# Supplementary material for: Palladium-Catalyzed Esterification of Aryl Fluorosulfates with Aryl Formates
Source: MDPI journal article supplement (doi:10.3390/molecules29091991), 2024-04-26

# Supporting Information

## Palladium-catalyzed esterification of aryl fluorosulfates with aryl formates

Xue Chen,<sup>a</sup> Yuan Liang,<sup>a</sup> Wen-Wen Wang,<sup>a</sup> Chengping Miao,<sup>b</sup> Xue-Qiang Chu,<sup>a</sup> Weidong Rao,<sup>c</sup>  
Hao Xu,<sup>\*,a</sup> Xiaocong Zhou,<sup>\*,a,b</sup> and Zhi-Liang Shen<sup>\*,a</sup>

<sup>a</sup> Technical Institute of Fluorochemistry (TIF), Institute of Advanced Synthesis, School of Chemistry and Molecular Engineering, Nanjing Tech University, Nanjing 211816, China. E-mail: xuhao@njtech.edu.cn, ias\_zlshen@njtech.edu.cn

<sup>b</sup> College of Biological, Chemical Science and Engineering, Jiaxing University, 118 Jiahang Road, Jiaxing 314001, China. E-mail: xczhou@zjxu.edu.cn

<sup>c</sup> Jiangsu Provincial Key Lab for the Chemistry and Utilization of Agro-Forest Biomass, College of Chemical Engineering, Nanjing Forestry University, Nanjing 210037, China.

### Table of Contents

|                                                                                                 |          |
|-------------------------------------------------------------------------------------------------|----------|
| Optimization of reaction conditions.....                                                        | page S6  |
| <b>Figure S1.</b> <sup>1</sup> H NMR spectrum of <b>2s</b> (400 MHz, CDCl <sub>3</sub> ) .....  | page S8  |
| <b>Figure S2.</b> <sup>13</sup> C NMR spectrum of <b>2s</b> (100 MHz, CDCl <sub>3</sub> ) ..... | page S8  |
| <b>Figure S3.</b> <sup>1</sup> H NMR spectrum of <b>3a</b> (400 MHz, CDCl <sub>3</sub> ) .....  | page S9  |
| <b>Figure S4.</b> <sup>13</sup> C NMR spectrum of <b>3a</b> (100 MHz, CDCl <sub>3</sub> ) ..... | page S9  |
| <b>Figure S5.</b> <sup>1</sup> H NMR spectrum of <b>3b</b> (400 MHz, CDCl <sub>3</sub> ) .....  | page S10 |
| <b>Figure S6.</b> <sup>13</sup> C NMR spectrum of <b>3b</b> (100 MHz, CDCl <sub>3</sub> ) ..... | page S10 |

|                                                                                                |          |
|------------------------------------------------------------------------------------------------|----------|
| <b>Figure S7.</b> $^1\text{H}$ NMR spectrum of <b>3c</b> (400 MHz, $\text{CDCl}_3$ ) .....     | page S11 |
| <b>Figure S8.</b> $^{13}\text{C}$ NMR spectrum of <b>3c</b> (100 MHz, $\text{CDCl}_3$ ) .....  | page S11 |
| <b>Figure S9.</b> $^1\text{H}$ NMR spectrum of <b>3d</b> (400 MHz, $\text{CDCl}_3$ ) .....     | page S12 |
| <b>Figure S10.</b> $^{13}\text{C}$ NMR spectrum of <b>3d</b> (100 MHz, $\text{CDCl}_3$ ) ..... | page S12 |
| <b>Figure S11.</b> $^1\text{H}$ NMR spectrum of <b>3e</b> (400 MHz, $\text{CDCl}_3$ ) .....    | page S13 |
| <b>Figure S12.</b> $^{13}\text{C}$ NMR spectrum of <b>3e</b> (100 MHz, $\text{CDCl}_3$ ) ..... | page S13 |
| <b>Figure S13.</b> $^{19}\text{F}$ NMR spectrum of <b>3e</b> (376 MHz, $\text{CDCl}_3$ ) ..... | page S14 |
| <b>Figure S14.</b> $^1\text{H}$ NMR spectrum of <b>3f</b> (400 MHz, $\text{CDCl}_3$ ) .....    | page S14 |
| <b>Figure S15.</b> $^{13}\text{C}$ NMR spectrum of <b>3f</b> (100 MHz, $\text{CDCl}_3$ ) ..... | page S15 |
| <b>Figure S16.</b> $^{19}\text{F}$ NMR spectrum of <b>3f</b> (376 MHz, $\text{CDCl}_3$ ) ..... | page S15 |
| <b>Figure S17.</b> $^1\text{H}$ NMR spectrum of <b>3g</b> (400 MHz, $\text{CDCl}_3$ ) .....    | page S16 |
| <b>Figure S18.</b> $^{13}\text{C}$ NMR spectrum of <b>3g</b> (100 MHz, $\text{CDCl}_3$ ) ..... | page S16 |
| <b>Figure S19.</b> $^1\text{H}$ NMR spectrum of <b>3h</b> (400 MHz, $\text{CDCl}_3$ ) .....    | page S17 |
| <b>Figure S20.</b> $^{13}\text{C}$ NMR spectrum of <b>3h</b> (100 MHz, $\text{CDCl}_3$ ) ..... | page S17 |
| <b>Figure S21.</b> $^1\text{H}$ NMR spectrum of <b>3i</b> (400 MHz, $\text{CDCl}_3$ ) .....    | page S18 |
| <b>Figure S22.</b> $^{13}\text{C}$ NMR spectrum of <b>3i</b> (100 MHz, $\text{CDCl}_3$ ) ..... | page S18 |
| <b>Figure S23.</b> $^1\text{H}$ NMR spectrum of <b>3j</b> (400 MHz, $\text{CDCl}_3$ ) .....    | page S19 |
| <b>Figure S24.</b> $^{13}\text{C}$ NMR spectrum of <b>3j</b> (100 MHz, $\text{CDCl}_3$ ) ..... | page S19 |
| <b>Figure S25.</b> $^1\text{H}$ NMR spectrum of <b>3k</b> (400 MHz, $\text{CDCl}_3$ ) .....    | page S20 |
| <b>Figure S26.</b> $^{13}\text{C}$ NMR spectrum of <b>3k</b> (100 MHz, $\text{CDCl}_3$ ) ..... | page S20 |
| <b>Figure S27.</b> $^1\text{H}$ NMR spectrum of <b>3l</b> (400 MHz, $\text{CDCl}_3$ ) .....    | page S21 |
| <b>Figure S28.</b> $^{13}\text{C}$ NMR spectrum of <b>3l</b> (100 MHz, $\text{CDCl}_3$ ) ..... | page S21 |

|                                                                                                |          |
|------------------------------------------------------------------------------------------------|----------|
| <b>Figure S29.</b> $^1\text{H}$ NMR spectrum of <b>3m</b> (400 MHz, $\text{CDCl}_3$ ) .....    | page S22 |
| <b>Figure S30.</b> $^{13}\text{C}$ NMR spectrum of <b>3m</b> (100 MHz, $\text{CDCl}_3$ ) ..... | page S22 |
| <b>Figure S31.</b> $^1\text{H}$ NMR spectrum of <b>3n</b> (400 MHz, $\text{CDCl}_3$ ) .....    | page S23 |
| <b>Figure S32.</b> $^{13}\text{C}$ NMR spectrum of <b>3n</b> (100 MHz, $\text{CDCl}_3$ ) ..... | page S23 |
| <b>Figure S33.</b> $^1\text{H}$ NMR spectrum of <b>3o</b> (400 MHz, $\text{CDCl}_3$ ) .....    | page S24 |
| <b>Figure S34.</b> $^{13}\text{C}$ NMR spectrum of <b>3o</b> (100 MHz, $\text{CDCl}_3$ ) ..... | page S24 |
| <b>Figure S35.</b> $^1\text{H}$ NMR spectrum of <b>3p</b> (400 MHz, $\text{CDCl}_3$ ) .....    | page S25 |
| <b>Figure S36.</b> $^{13}\text{C}$ NMR spectrum of <b>3p</b> (100 MHz, $\text{CDCl}_3$ ) ..... | page S25 |
| <b>Figure S37.</b> $^1\text{H}$ NMR spectrum of <b>3q</b> (400 MHz, $\text{CDCl}_3$ ) .....    | page S26 |
| <b>Figure S38.</b> $^{13}\text{C}$ NMR spectrum of <b>3q</b> (100 MHz, $\text{CDCl}_3$ ) ..... | page S26 |
| <b>Figure S39.</b> $^1\text{H}$ NMR spectrum of <b>3r</b> (400 MHz, $\text{CDCl}_3$ ) .....    | page S27 |
| <b>Figure S40.</b> $^{13}\text{C}$ NMR spectrum of <b>3r</b> (100 MHz, $\text{CDCl}_3$ ) ..... | page S27 |
| <b>Figure S41.</b> $^1\text{H}$ NMR spectrum of <b>4b</b> (400 MHz, $\text{CDCl}_3$ ) .....    | page S28 |
| <b>Figure S42.</b> $^{13}\text{C}$ NMR spectrum of <b>4b</b> (100 MHz, $\text{CDCl}_3$ ) ..... | page S28 |
| <b>Figure S43.</b> $^1\text{H}$ NMR spectrum of <b>4c</b> (400 MHz, $\text{CDCl}_3$ ) .....    | page S29 |
| <b>Figure S44.</b> $^{13}\text{C}$ NMR spectrum of <b>4c</b> (100 MHz, $\text{CDCl}_3$ ) ..... | page S29 |
| <b>Figure S45.</b> $^{19}\text{F}$ NMR spectrum of <b>4c</b> (376 MHz, $\text{CDCl}_3$ ) ..... | page S30 |
| <b>Figure S46.</b> $^1\text{H}$ NMR spectrum of <b>4d</b> (400 MHz, $\text{CDCl}_3$ ) .....    | page S30 |
| <b>Figure S47.</b> $^{13}\text{C}$ NMR spectrum of <b>4d</b> (100 MHz, $\text{CDCl}_3$ ) ..... | page S31 |
| <b>Figure S48.</b> $^{19}\text{F}$ NMR spectrum of <b>4d</b> (376 MHz, $\text{CDCl}_3$ ) ..... | page S31 |
| <b>Figure S49.</b> $^1\text{H}$ NMR spectrum of <b>4e</b> (400 MHz, $\text{CDCl}_3$ ) .....    | page S32 |
| <b>Figure S50.</b> $^{13}\text{C}$ NMR spectrum of <b>4e</b> (100 MHz, $\text{CDCl}_3$ ) ..... | page S32 |

|                                                                                                |          |
|------------------------------------------------------------------------------------------------|----------|
| <b>Figure S51.</b> $^{19}\text{F}$ NMR spectrum of <b>4e</b> (376 MHz, $\text{CDCl}_3$ ) ..... | page S33 |
| <b>Figure S52.</b> $^1\text{H}$ NMR spectrum of <b>4f</b> (400 MHz, $\text{CDCl}_3$ ) .....    | page S33 |
| <b>Figure S53.</b> $^{13}\text{C}$ NMR spectrum of <b>4f</b> (100 MHz, $\text{CDCl}_3$ ) ..... | page S34 |
| <b>Figure S54.</b> $^1\text{H}$ NMR spectrum of <b>4g</b> (400 MHz, $\text{CDCl}_3$ ) .....    | page S34 |
| <b>Figure S55.</b> $^{13}\text{C}$ NMR spectrum of <b>4g</b> (100 MHz, $\text{CDCl}_3$ ) ..... | page S35 |
| <b>Figure S56.</b> $^1\text{H}$ NMR spectrum of <b>4h</b> (400 MHz, $\text{CDCl}_3$ ) .....    | page S35 |
| <b>Figure S57.</b> $^{13}\text{C}$ NMR spectrum of <b>4h</b> (100 MHz, $\text{CDCl}_3$ ) ..... | page S36 |
| <b>Figure S58.</b> $^1\text{H}$ NMR spectrum of <b>4i</b> (400 MHz, $\text{CDCl}_3$ ) .....    | page S36 |
| <b>Figure S59.</b> $^{13}\text{C}$ NMR spectrum of <b>4i</b> (100 MHz, $\text{CDCl}_3$ ) ..... | page S37 |
| <b>Figure S60.</b> $^1\text{H}$ NMR spectrum of <b>4j</b> (400 MHz, $\text{CDCl}_3$ ) .....    | page S37 |
| <b>Figure S61.</b> $^{13}\text{C}$ NMR spectrum of <b>4j</b> (100 MHz, $\text{CDCl}_3$ ) ..... | page S38 |
| <b>Figure S62.</b> $^1\text{H}$ NMR spectrum of <b>4k</b> (400 MHz, $\text{CDCl}_3$ ) .....    | page S38 |
| <b>Figure S63.</b> $^{13}\text{C}$ NMR spectrum of <b>4k</b> (100 MHz, $\text{CDCl}_3$ ) ..... | page S39 |
| <b>Figure S64.</b> $^1\text{H}$ NMR spectrum of <b>4l</b> (400 MHz, $\text{CDCl}_3$ ) .....    | page S39 |
| <b>Figure S65.</b> $^{13}\text{C}$ NMR spectrum of <b>4l</b> (100 MHz, $\text{CDCl}_3$ ) ..... | page S40 |
| <b>Figure S66.</b> $^1\text{H}$ NMR spectrum of <b>4m</b> (400 MHz, $\text{CDCl}_3$ ) .....    | page S40 |
| <b>Figure S67.</b> $^{13}\text{C}$ NMR spectrum of <b>4m</b> (100 MHz, $\text{CDCl}_3$ ) ..... | page S41 |
| <b>Figure S68.</b> $^1\text{H}$ NMR spectrum of <b>4n</b> (400 MHz, $\text{CDCl}_3$ ) .....    | page S41 |
| <b>Figure S69.</b> $^{13}\text{C}$ NMR spectrum of <b>4n</b> (100 MHz, $\text{CDCl}_3$ ) ..... | page S42 |
| <b>Figure S70.</b> $^1\text{H}$ NMR spectrum of <b>4o</b> (400 MHz, $\text{CDCl}_3$ ) .....    | page S42 |
| <b>Figure S71.</b> $^{13}\text{C}$ NMR spectrum of <b>4o</b> (100 MHz, $\text{CDCl}_3$ ) ..... | page S43 |
| <b>Figure S72.</b> $^1\text{H}$ NMR spectrum of <b>4p</b> (400 MHz, $\text{CDCl}_3$ ) .....    | page S43 |

|                                                                                                |          |
|------------------------------------------------------------------------------------------------|----------|
| <b>Figure S73.</b> $^{13}\text{C}$ NMR spectrum of <b>4p</b> (100 MHz, $\text{CDCl}_3$ ) ..... | page S44 |
| <b>Figure S74.</b> $^1\text{H}$ NMR spectrum of <b>4q</b> (400 MHz, $\text{CDCl}_3$ ) .....    | page S44 |
| <b>Figure S75.</b> $^{13}\text{C}$ NMR spectrum of <b>4q</b> (100 MHz, $\text{CDCl}_3$ ) ..... | page S45 |
| <b>Figure S76.</b> $^1\text{H}$ NMR spectrum of <b>4s</b> (400 MHz, $\text{CDCl}_3$ ) .....    | page S45 |
| <b>Figure S77.</b> $^{13}\text{C}$ NMR spectrum of <b>4s</b> (100 MHz, $\text{CDCl}_3$ ) ..... | page S46 |

## Optimization of reaction conditions

**Table S1.** Optimization of reaction conditions by using different ligands<sup>a</sup>

|  |  |  |  |  |  |
|--|--|--|--|--|--|
|  |  |  |  |  |  |
|  |  |  |  |  |  |
|  |  |  |  |  |  |
|  |  |  |  |  |  |
|  |  |  |  |  |  |

  

| Entry | Ligand     | Yield (%) <sup>b</sup> | Entry | Ligand     | Yield (%) <sup>b</sup> |
|-------|------------|------------------------|-------|------------|------------------------|
| 1     | <b>L1</b>  | 0                      | 11    | <b>L11</b> | trace                  |
| 2     | <b>L2</b>  | 0                      | 12    | <b>L12</b> | 8                      |
| 3     | <b>L3</b>  | 0                      | 13    | <b>L13</b> | 82 (84) <sup>c</sup>   |
| 4     | <b>L4</b>  | 0                      | 14    | <b>L14</b> | trace                  |
| 5     | <b>L5</b>  | 0                      | 15    | <b>L15</b> | trace                  |
| 6     | <b>L6</b>  | trace                  | 16    | <b>L16</b> | trace                  |
| 7     | <b>L7</b>  | 75                     | 17    | <b>L17</b> | 0                      |
| 8     | <b>L8</b>  | 76                     | 18    | <b>L18</b> | 0                      |
| 9     | <b>L9</b>  | 78                     | 19    | <b>L19</b> | trace                  |
| 10    | <b>L10</b> | 13                     | 20    | <b>L20</b> | 0                      |

<sup>a</sup> The reactions were performed at 80 °C for 12 h under nitrogen atmosphere by using **1a** (0.5 mmol), **2a** (1.0 mmol), Pd(OAc)<sub>2</sub> (5 mol%), ligand (5 mol%), and Et<sub>3</sub>N (1.0 mmol) in anhydrous DMF (2 mL). <sup>b</sup> Yields were determined by NMR analysis of crude reaction mixture after work-up by using 1,4-dimethoxybenzene as an internal standard.

<sup>c</sup> Isolated yield.

**Table S2.** Optimization of reaction conditions by using different bases<sup>a</sup>

$\text{1a (1 equiv.)} + \text{2a (2 equiv.)} \xrightarrow[\text{DMF, N}_2, 80\text{ }^\circ\text{C, 12 h}]{\text{Pd(OAc)}_2\text{ (5 mol\%)} \\ \text{XantPhos (5 mol\%)} \\ \text{base (2 equiv.)}}$

| Entry    | Base                   | Yield (%) <sup>b</sup>     | Entry | Base                            | Yield (%) <sup>b</sup> |
|----------|------------------------|----------------------------|-------|---------------------------------|------------------------|
| <b>1</b> | <b>Et<sub>3</sub>N</b> | <b>82 (84)<sup>c</sup></b> | 6     | <sup>t</sup> BuONa              | 15                     |
| 2        | DIPEA                  | 79                         | 7     | Cs <sub>2</sub> CO <sub>3</sub> | trace                  |
| 3        | DMAP                   | 77                         | 8     | K <sub>2</sub> CO <sub>3</sub>  | 28                     |
| 4        | DBU                    | 0                          | 9     | NaHCO <sub>3</sub>              | 54                     |
| 5        | Pyridine               | 0                          | 10    | NaOH                            | trace                  |

<sup>a</sup> The reactions were performed at 80 °C for 12 h under nitrogen atmosphere by using **1a** (0.5 mmol), **2a** (1.0 mmol), Pd(OAc)<sub>2</sub> (5 mol%), XantPhos (5 mol%), and base (1.0 mmol) in anhydrous DMF (2 mL). <sup>b</sup> Yields were determined by NMR analysis of crude reaction mixture after work-up by using 1,4-dimethoxybenzene as an internal standard. <sup>c</sup> Isolated yield.

**Table S3.** Optimization of reaction conditions by using different solvents<sup>a</sup>

$\text{1a (1 equiv.)} + \text{2a (2 equiv.)} \xrightarrow[\text{solvent, N}_2, 80\text{ }^\circ\text{C, 12 h}]{\text{Pd(OAc)}_2\text{ (5 mol\%)} \\ \text{XantPhos (5 mol\%)} \\ \text{Et}_3\text{N (2 equiv.)}}$

| Entry    | Solvent    | Yield (%) <sup>b</sup>     | Entry | Solvent     | Yield (%) <sup>b</sup> |
|----------|------------|----------------------------|-------|-------------|------------------------|
| <b>1</b> | <b>DMF</b> | <b>82 (84)<sup>c</sup></b> | 6     | MeCN        | 10                     |
| 2        | DMA        | 15                         | 7     | MeOH        | 0                      |
| 3        | NMP        | 18                         | 8     | 1,4-dioxane | 30                     |
| 4        | DMPU       | 13                         | 9     | THF         | 80                     |
| 5        | DMSO       | 49                         | 10    | toluene     | 27                     |

<sup>a</sup> The reactions were performed at 80 °C for 12 h under nitrogen atmosphere by using **1a** (0.5 mmol), **2a** (1.0 mmol), Pd(OAc)<sub>2</sub> (5 mol%), XantPhos (5 mol%), and Et<sub>3</sub>N (1.0 mmol) in solvent (2 mL). <sup>b</sup> Yields were determined by NMR analysis of crude reaction mixture after work-up by using 1,4-dimethoxybenzene as an internal standard. <sup>c</sup> Isolated yield.

**Figure S1.**  $^1\text{H}$  NMR spectrum of **2s** (400 MHz,  $\text{CDCl}_3$ )

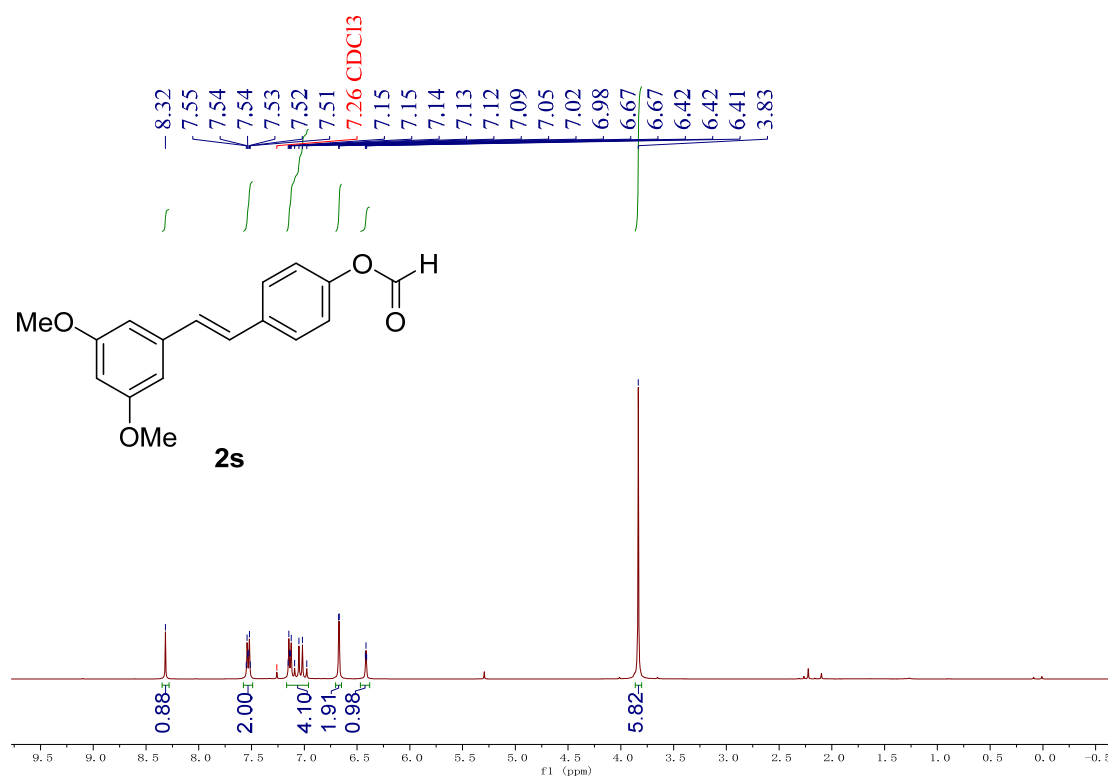

**Figure S2.**  $^{13}\text{C}$  NMR spectrum of **2s** (100 MHz,  $\text{CDCl}_3$ )

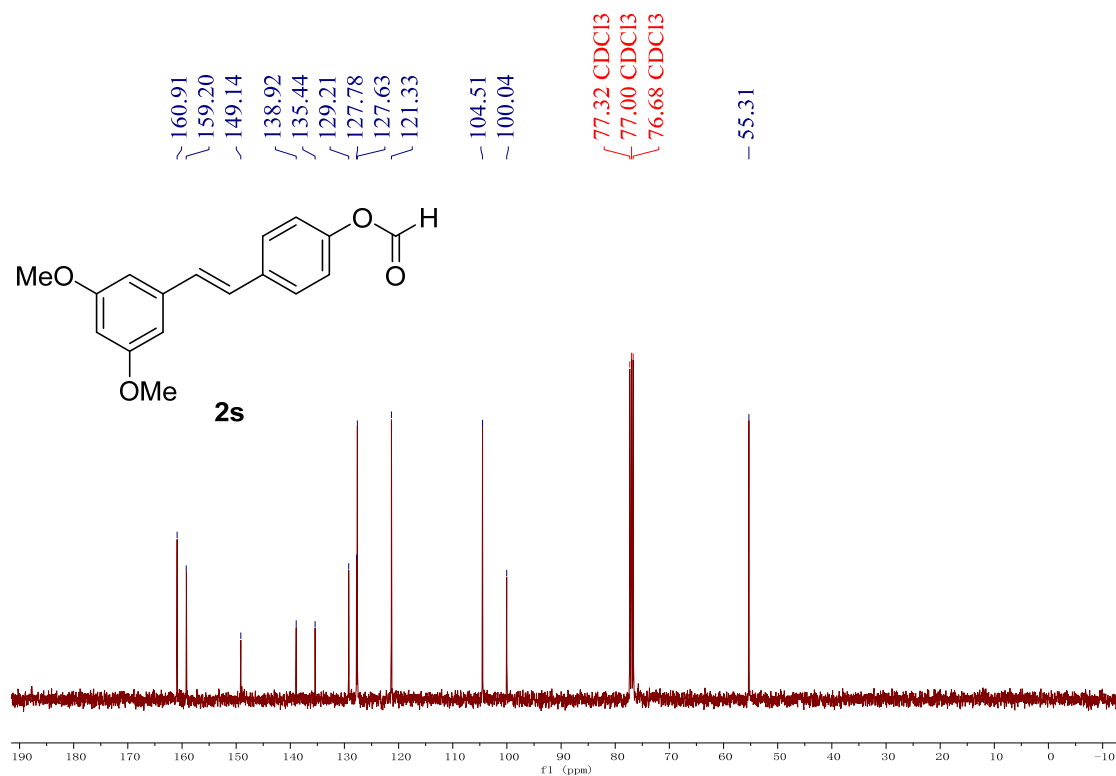



**Figure S3.**  $^1\text{H}$  NMR spectrum of **3a** (400 MHz,  $\text{CDCl}_3$ )

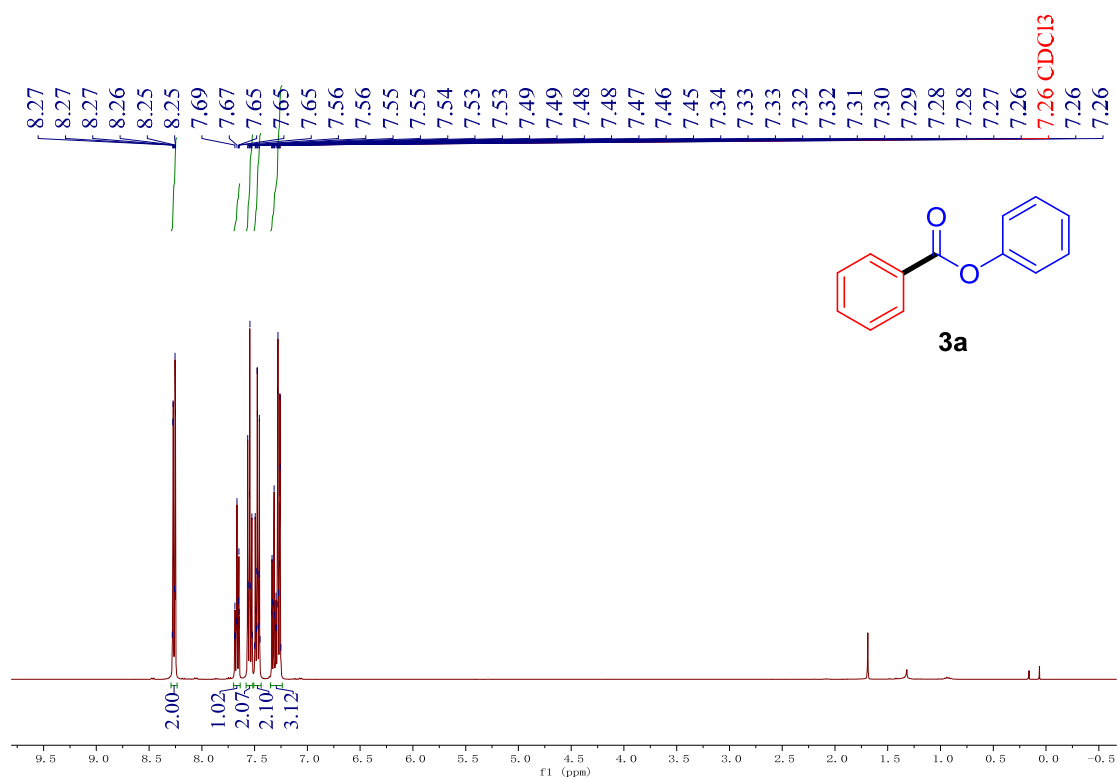

**Figure S4.**  $^{13}\text{C}$  NMR spectrum of **3a** (100 MHz,  $\text{CDCl}_3$ )

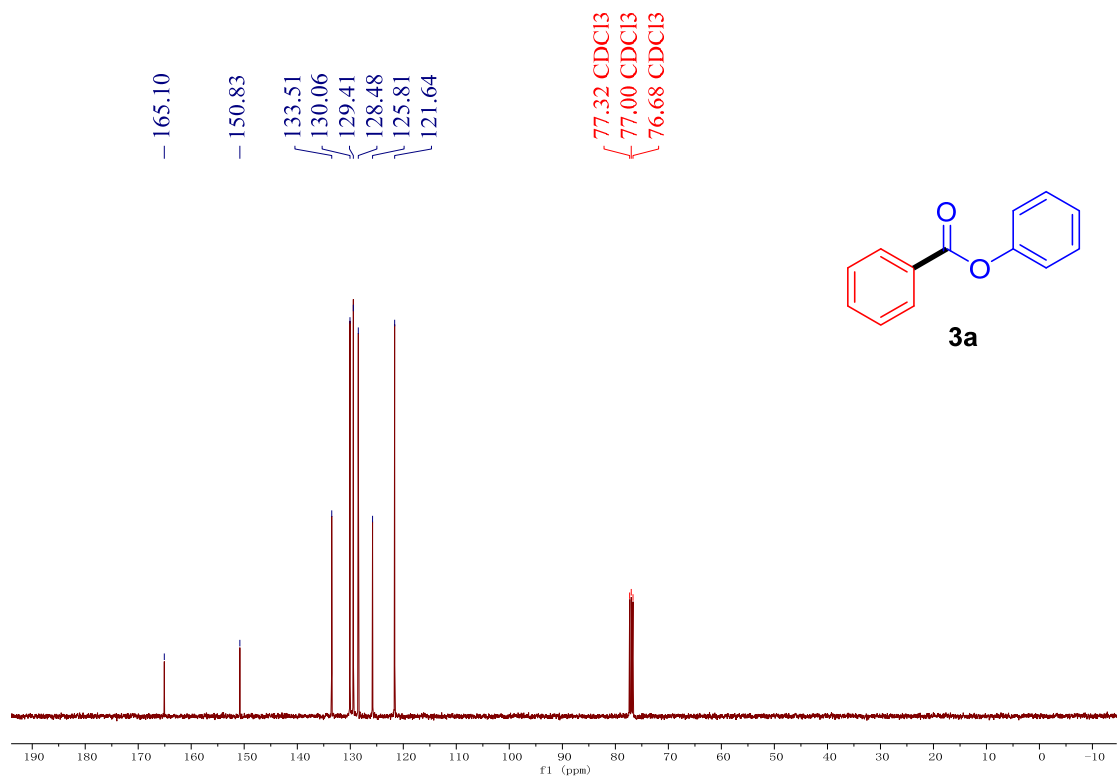

**Figure S5.**  $^1\text{H}$  NMR spectrum of **3b** (400 MHz,  $\text{CDCl}_3$ )

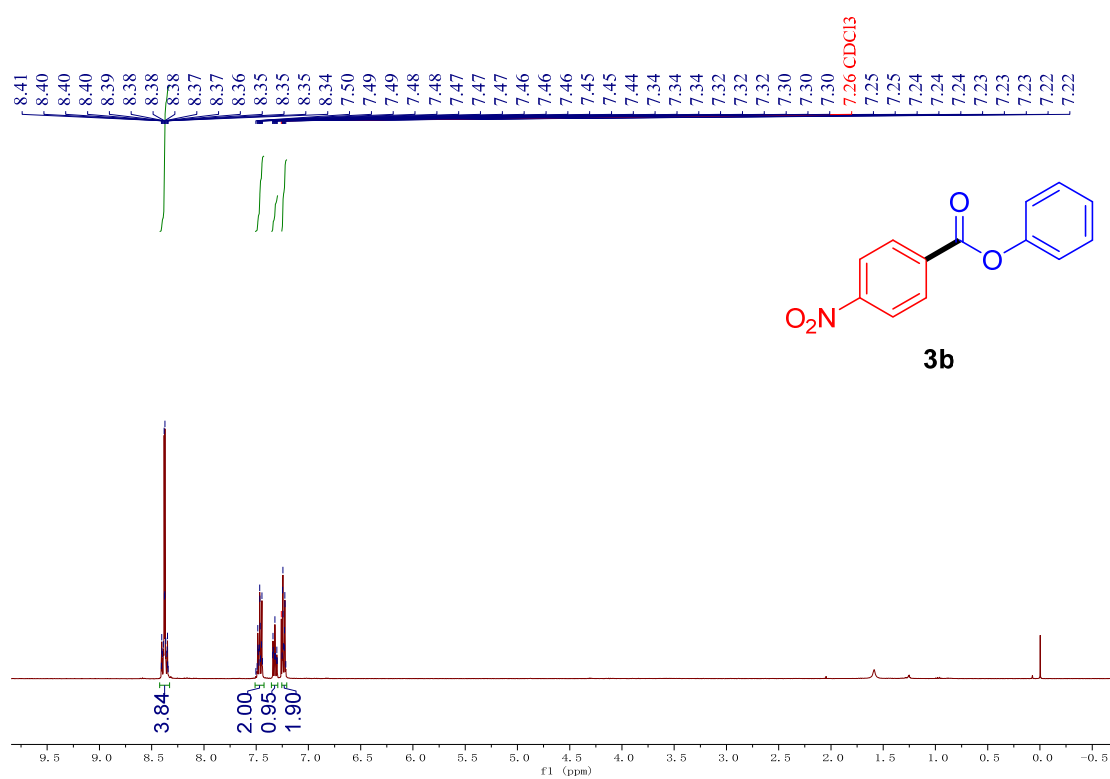

**Figure S6.**  $^{13}\text{C}$  NMR spectrum of **3b** (100 MHz,  $\text{CDCl}_3$ )

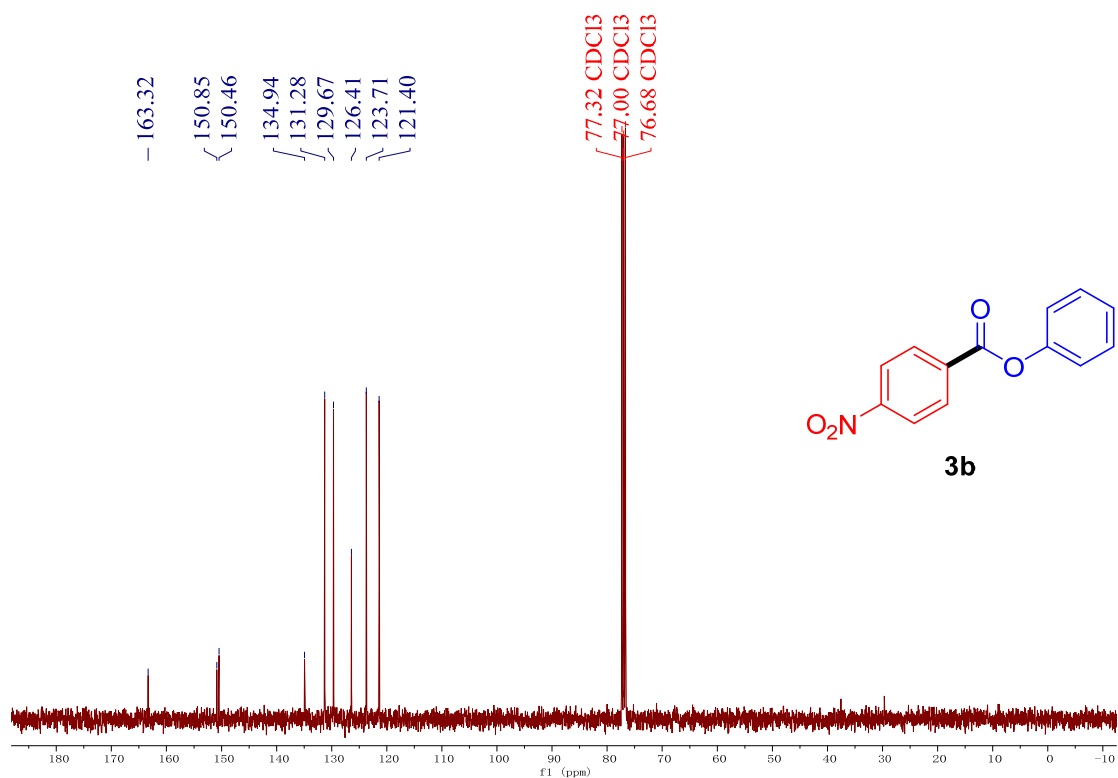

**Figure S7.**  $^1\text{H}$  NMR spectrum of **3c** (400 MHz,  $\text{CDCl}_3$ )

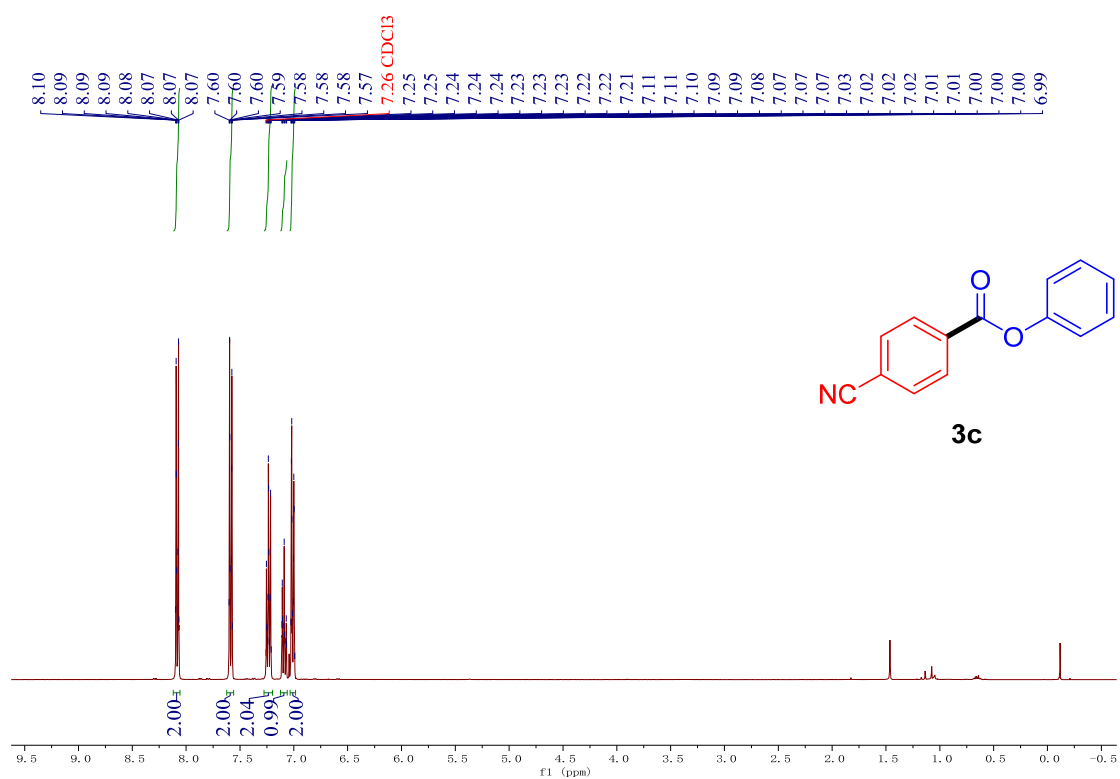

**Figure S8.**  $^{13}\text{C}$  NMR spectrum of **3c** (100 MHz,  $\text{CDCl}_3$ )

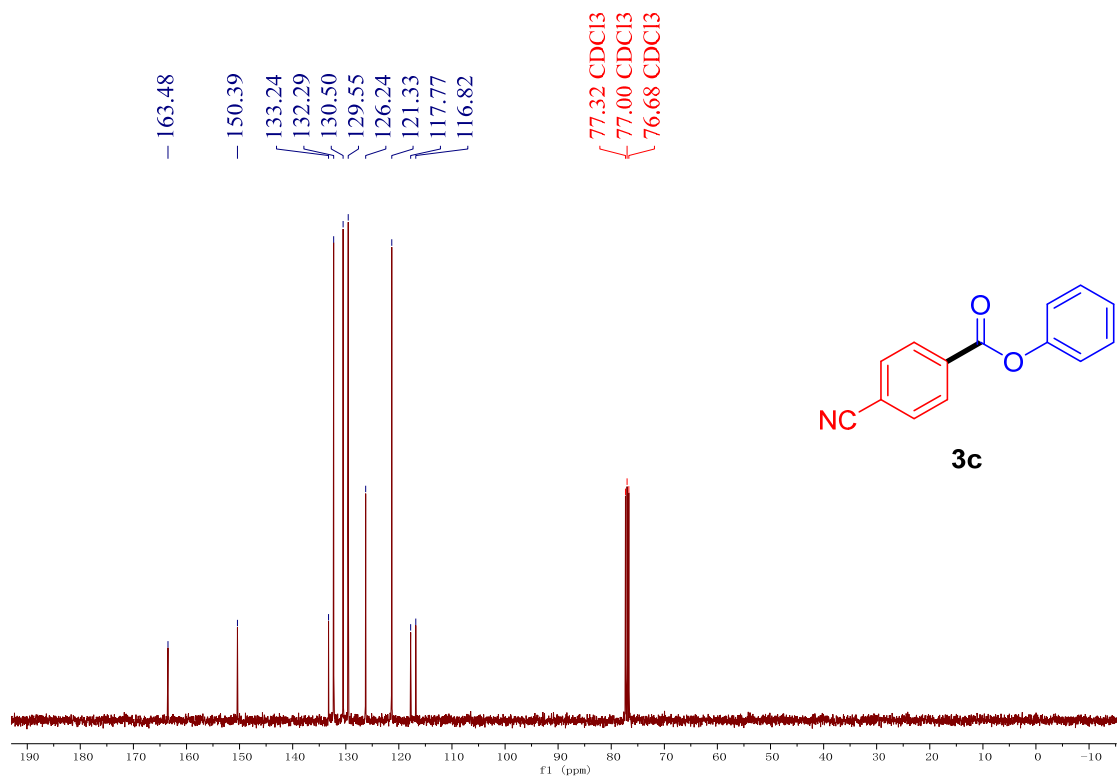

**Figure S9.**  $^1\text{H}$  NMR spectrum of **3d** (400 MHz,  $\text{CDCl}_3$ )

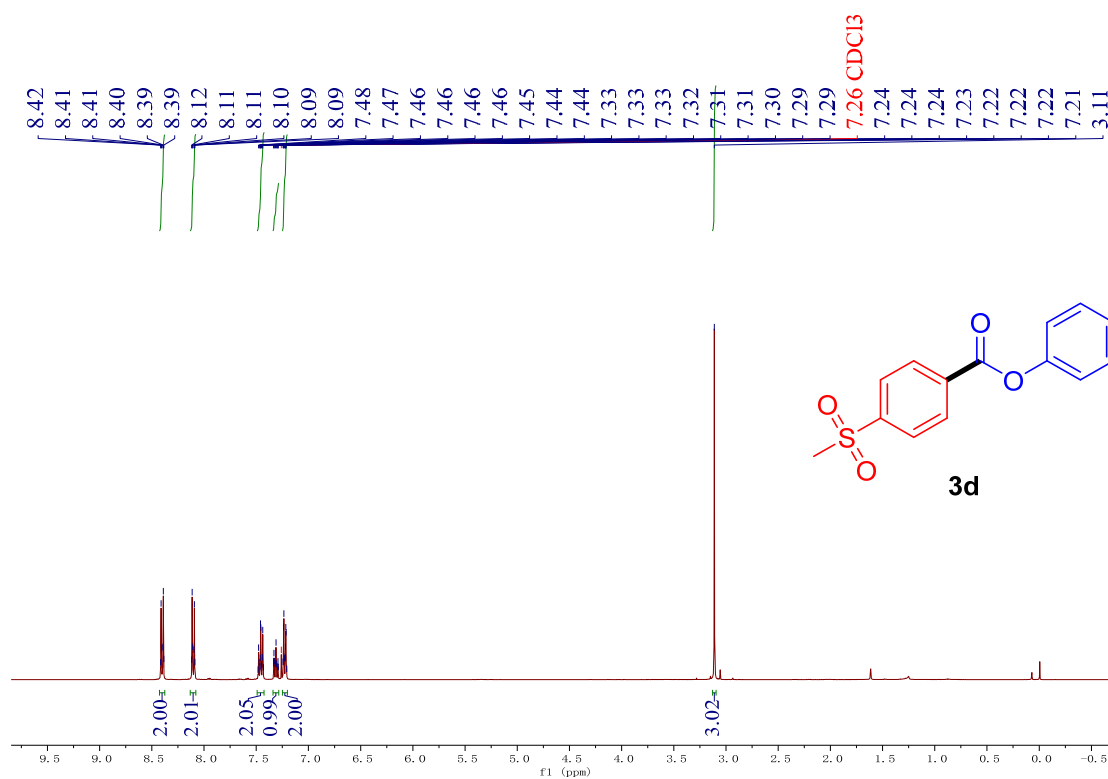

**Figure S10.**  $^{13}\text{C}$  NMR spectrum of **3d** (100 MHz,  $\text{CDCl}_3$ )

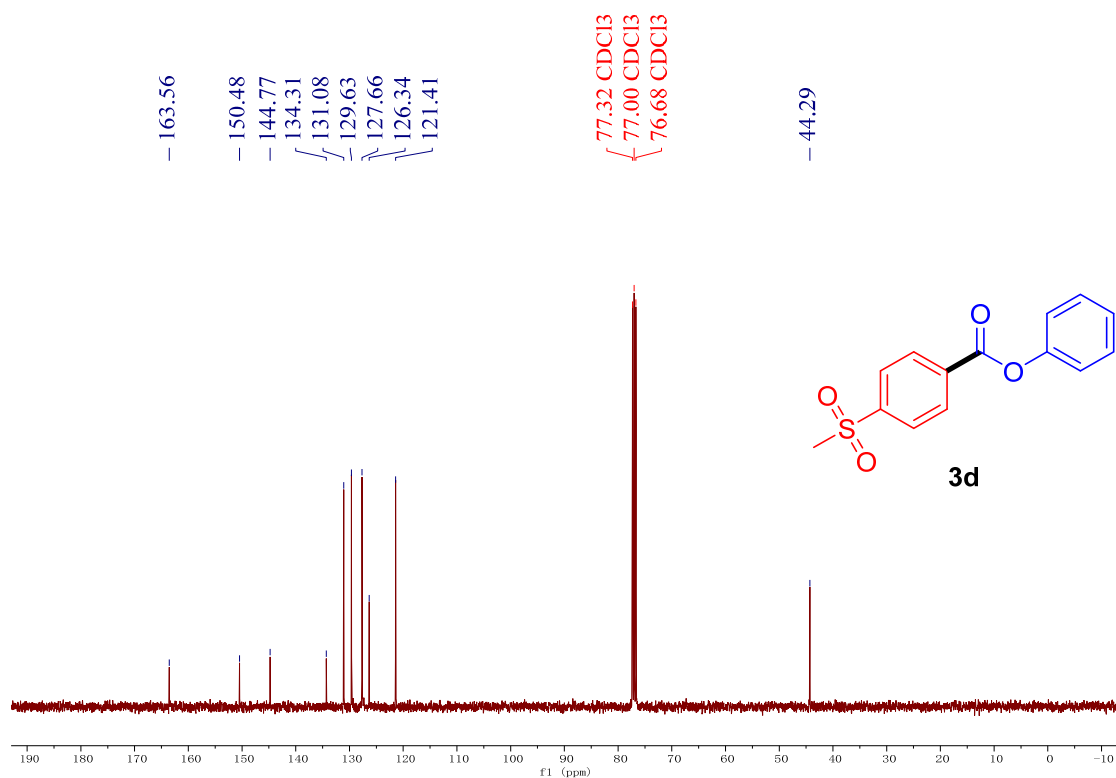

**Figure S11.**  $^1\text{H}$  NMR spectrum of **3e** (400 MHz,  $\text{CDCl}_3$ )

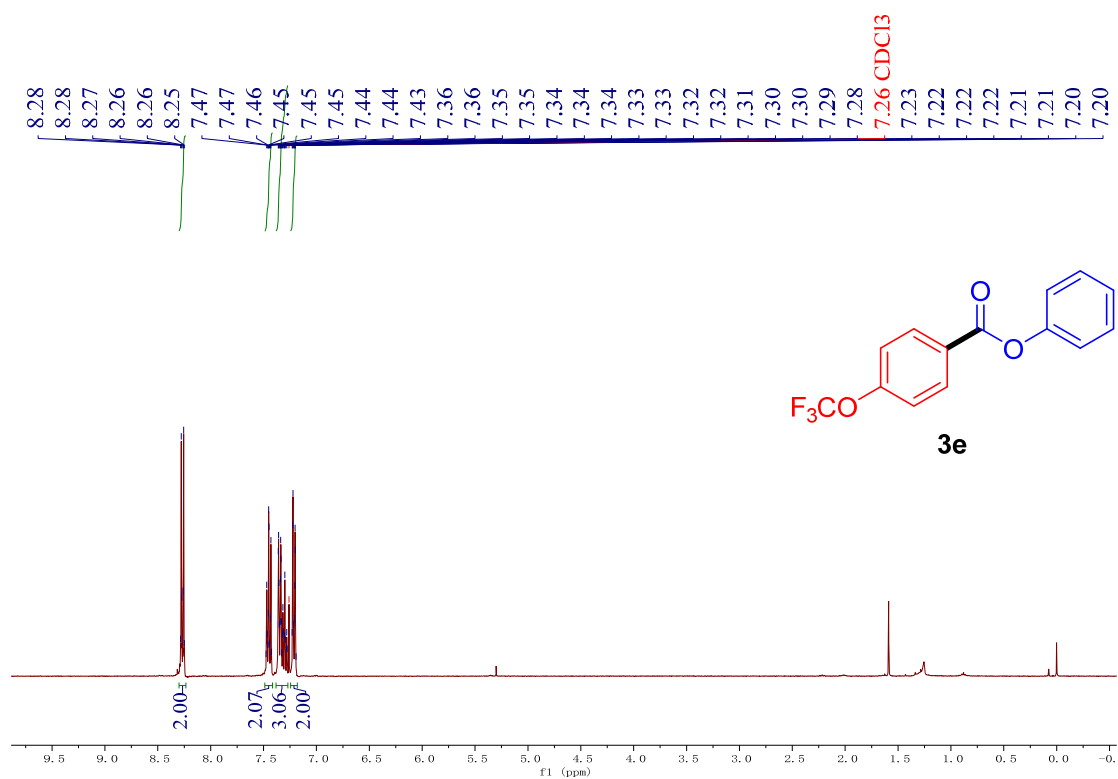

**Figure S12.**  $^{13}\text{C}$  NMR spectrum of **3e** (100 MHz,  $\text{CDCl}_3$ )

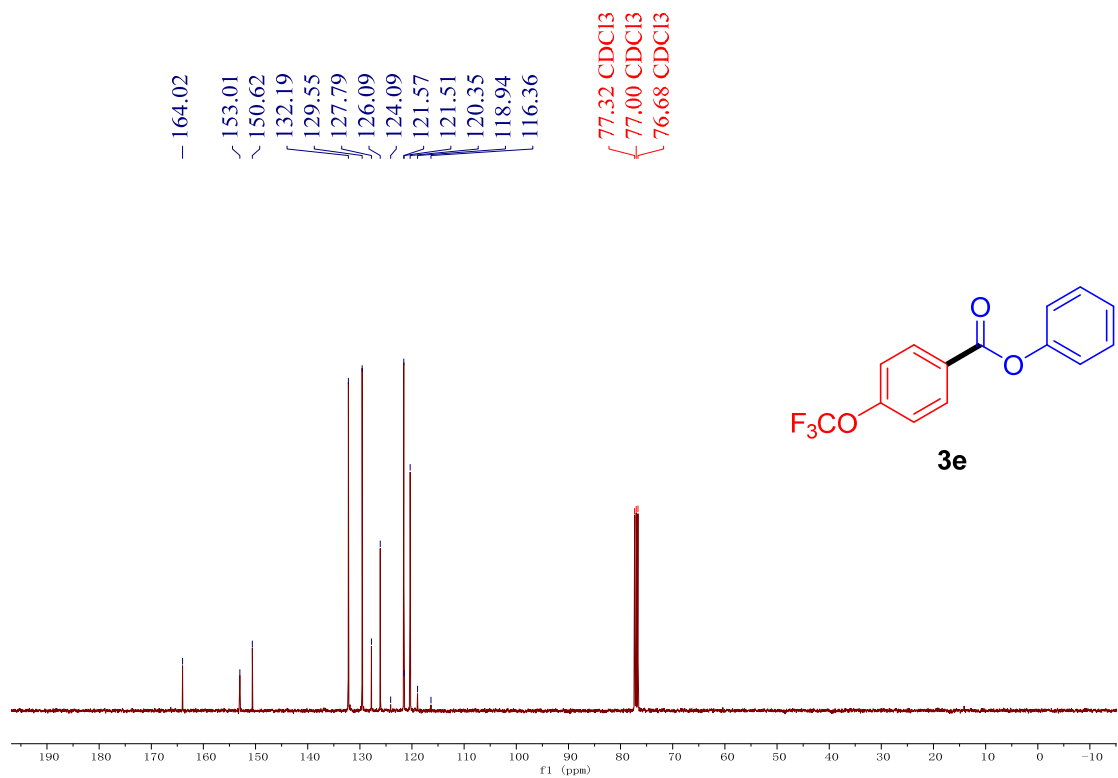

**Figure S13.**  $^{19}\text{F}$  NMR spectrum of **3e** (376 MHz,  $\text{CDCl}_3$ )

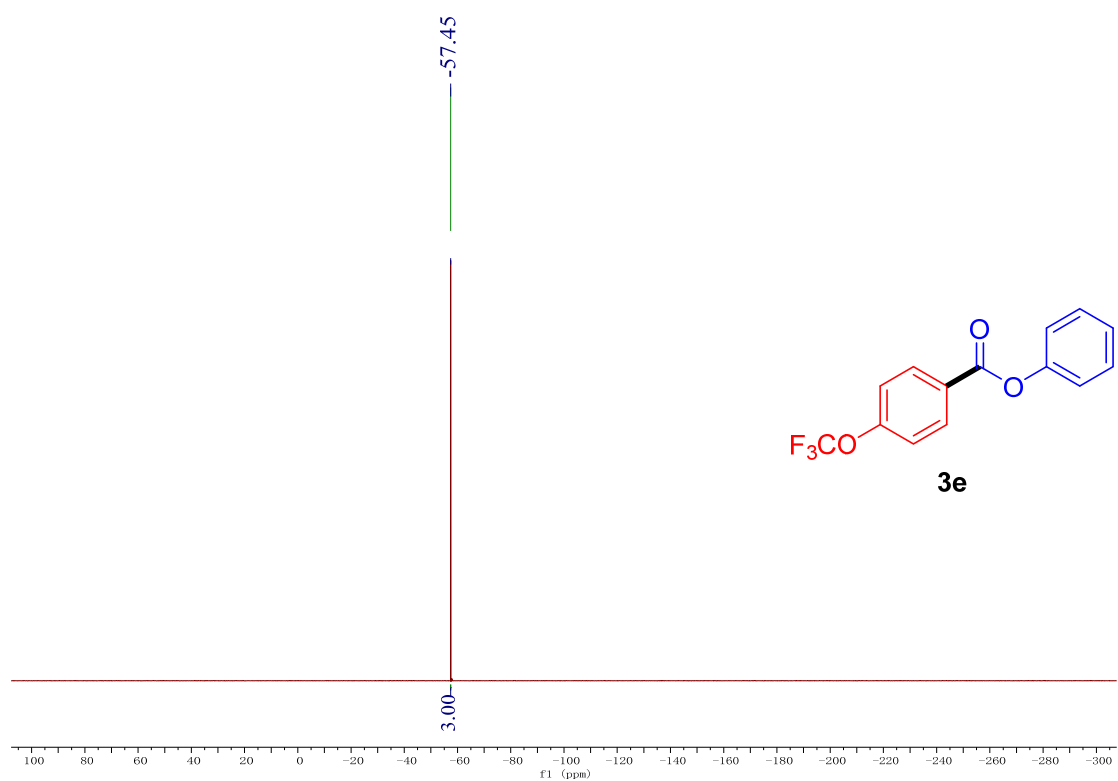

**Figure S14.**  $^1\text{H}$  NMR spectrum of **3f** (400 MHz,  $\text{CDCl}_3$ )

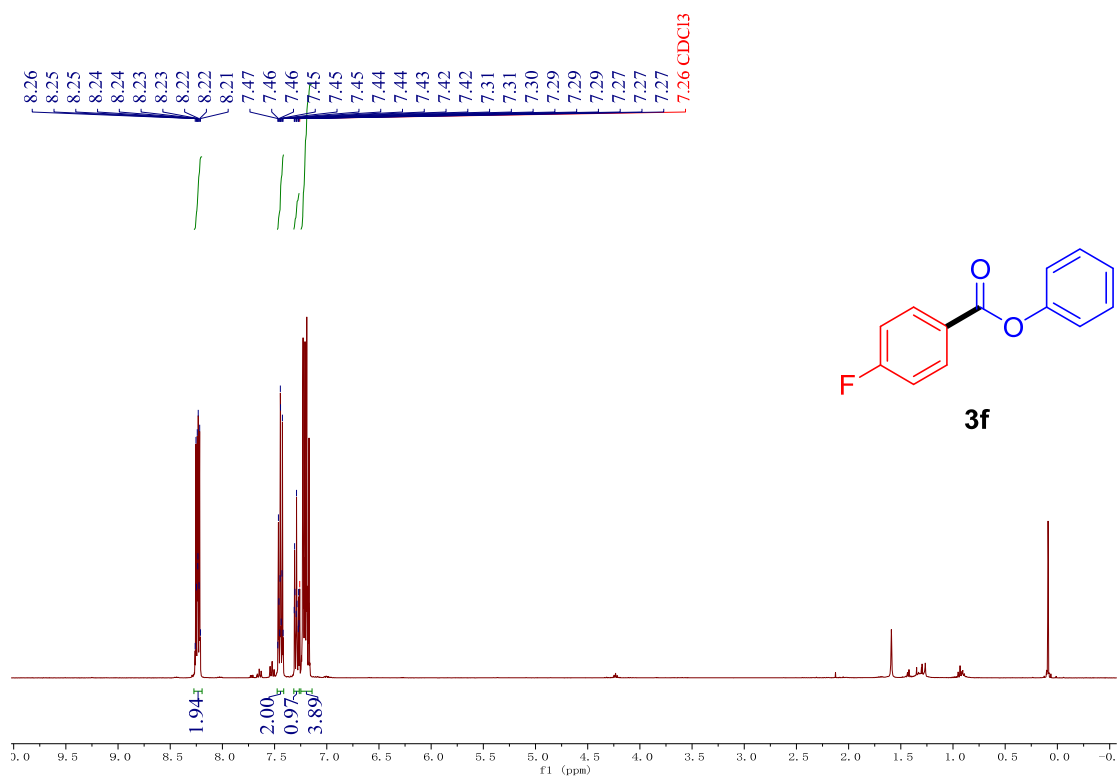

**Figure S15.**  $^{13}\text{C}$  NMR spectrum of **3f** (100 MHz,  $\text{CDCl}_3$ )

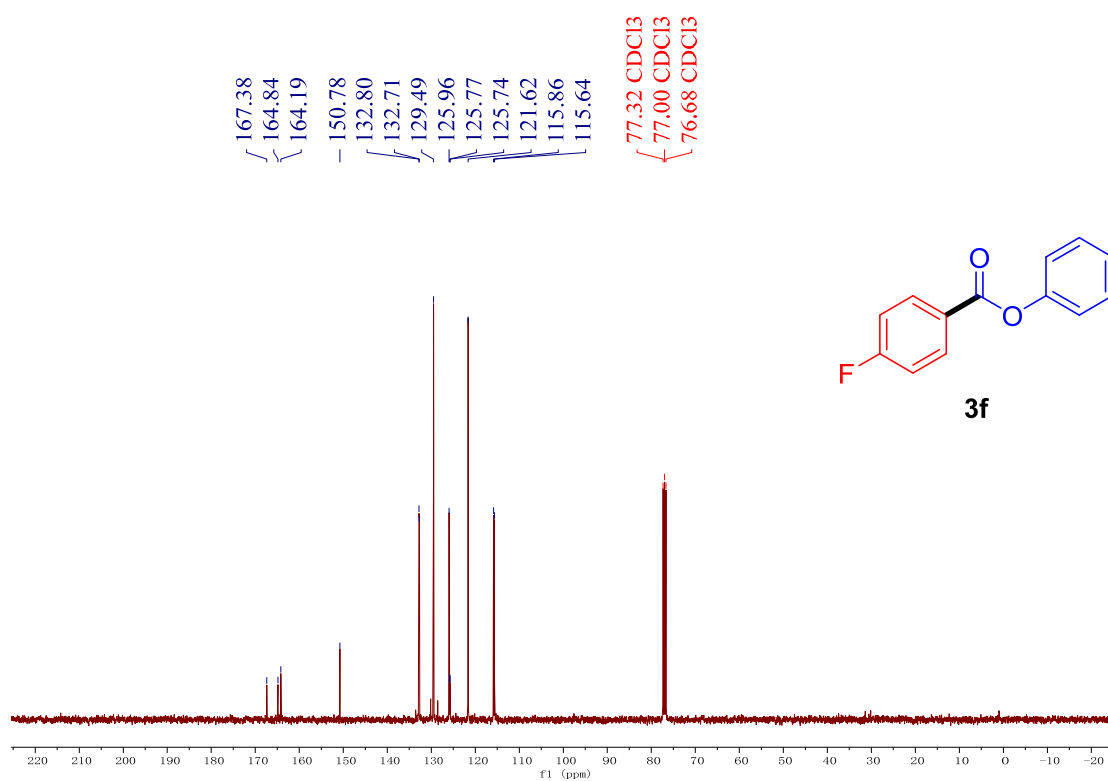

**Figure S16.**  $^{19}\text{F}$  NMR spectrum of **3f** (376 MHz,  $\text{CDCl}_3$ )

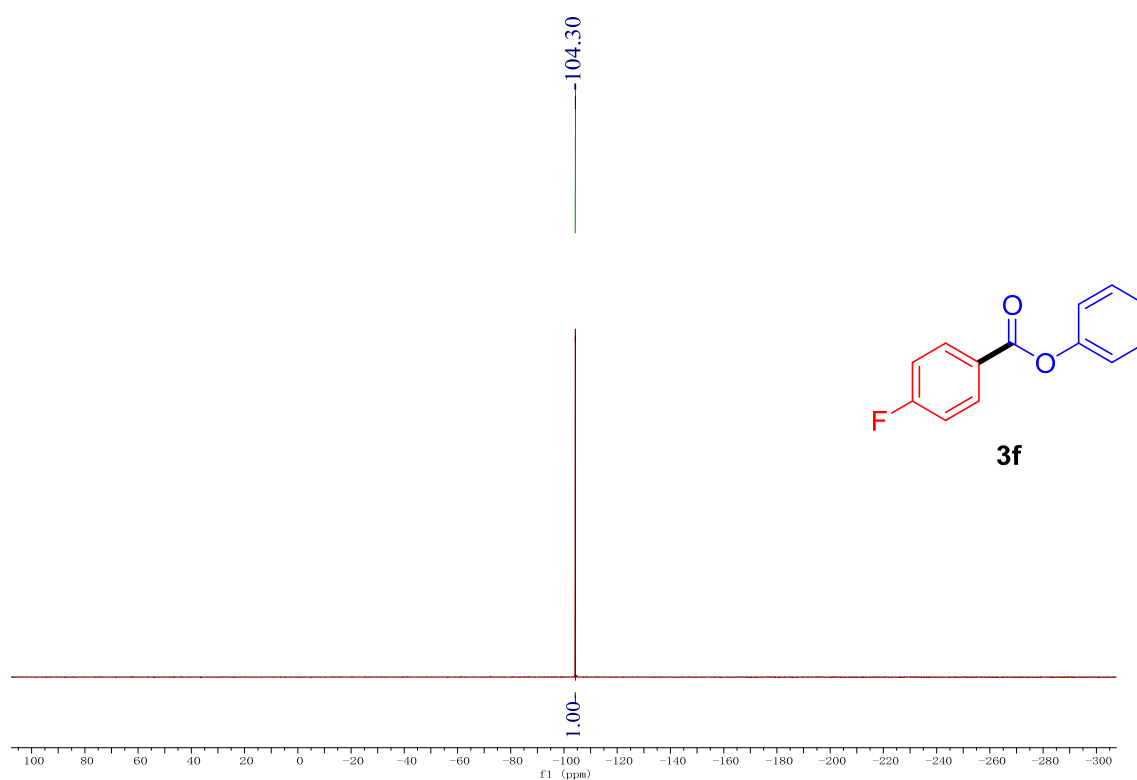

**Figure S17.**  $^1\text{H}$  NMR spectrum of **3g** (400 MHz,  $\text{CDCl}_3$ )

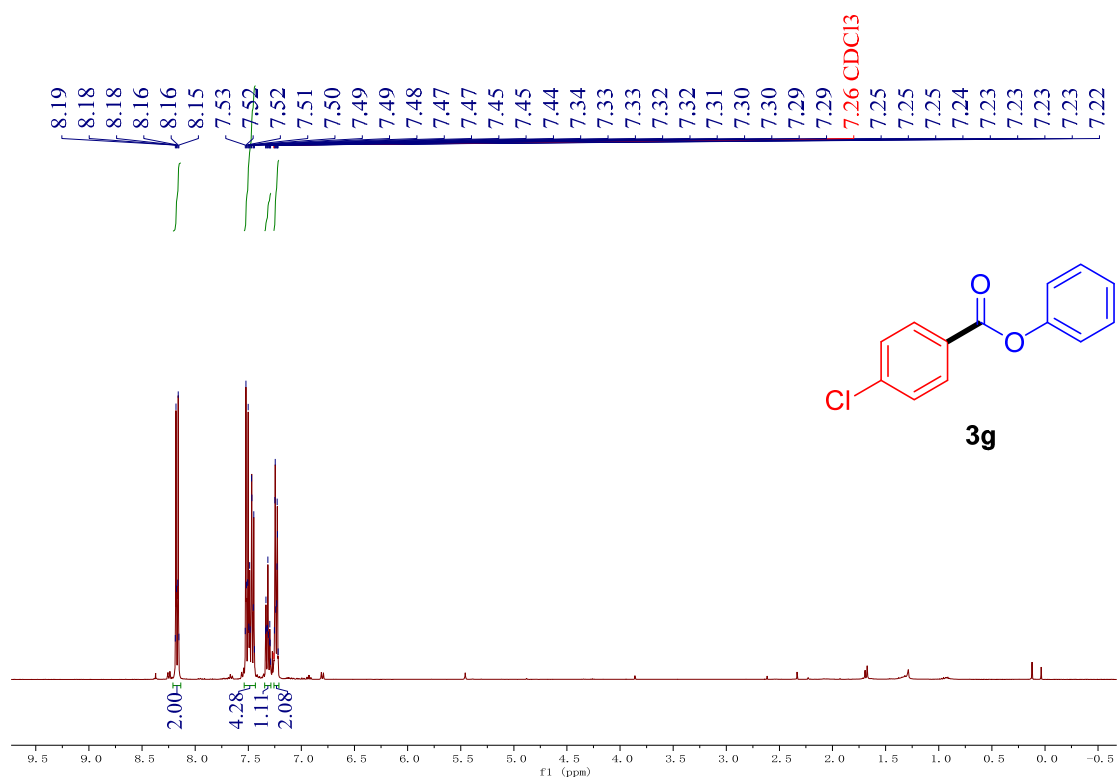

**Figure S18.**  $^{13}\text{C}$  NMR spectrum of **3g** (100 MHz,  $\text{CDCl}_3$ )

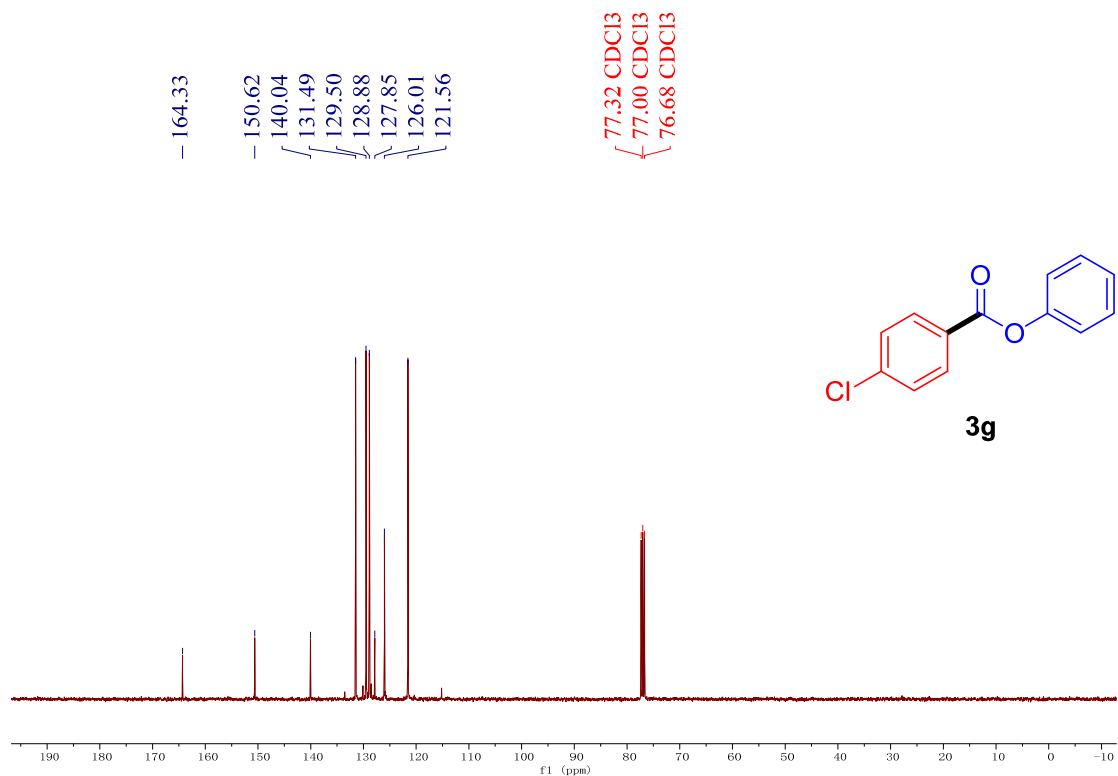



**Figure S19.**  $^1\text{H}$  NMR spectrum of **3h** (400 MHz,  $\text{CDCl}_3$ )

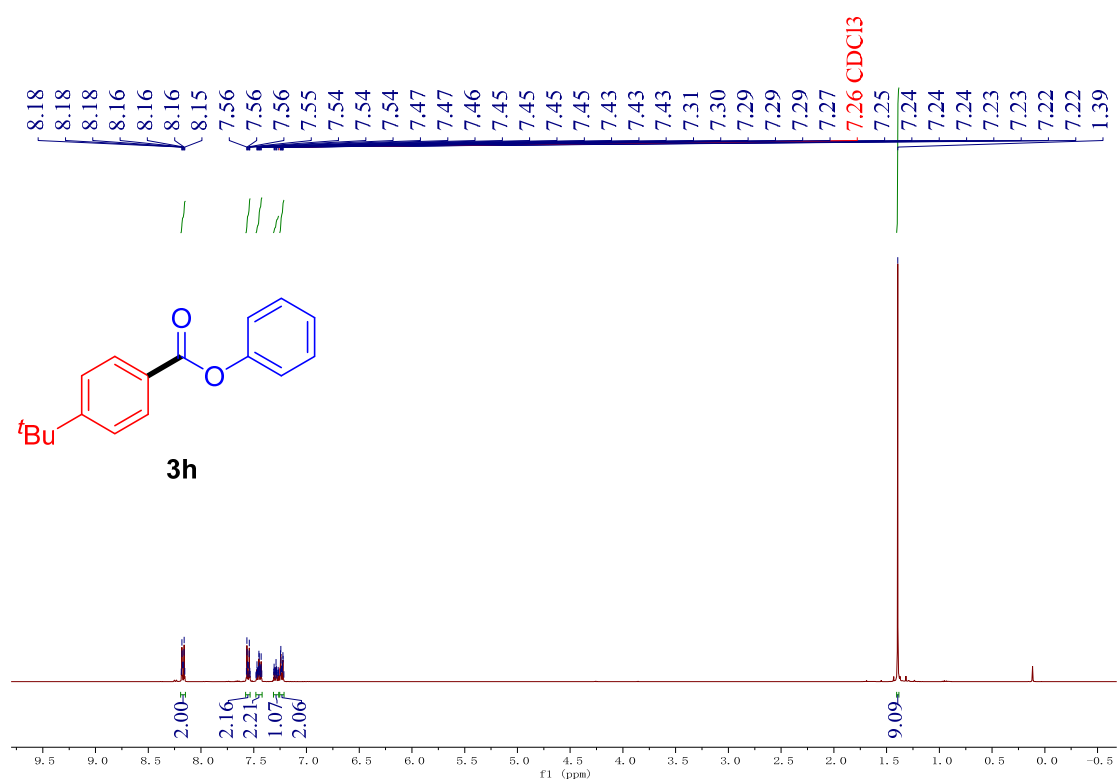

**Figure S20.**  $^{13}\text{C}$  NMR spectrum of **3h** (100 MHz,  $\text{CDCl}_3$ )

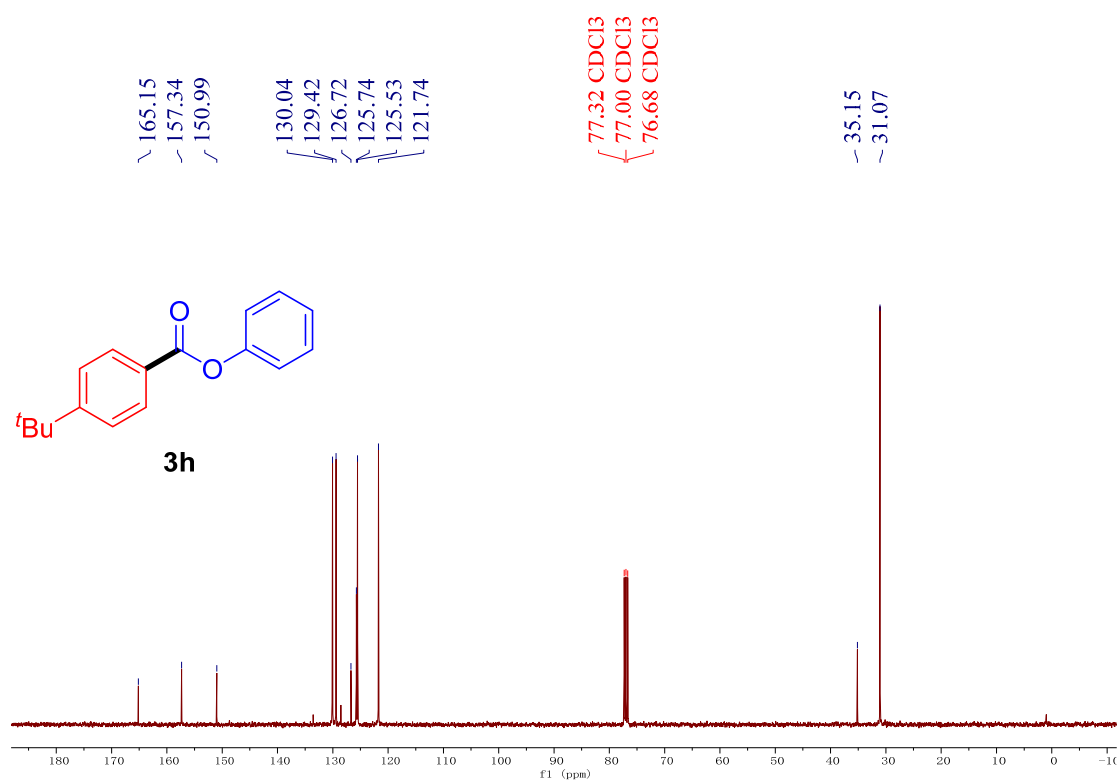

**Figure S21.**  $^1\text{H}$  NMR spectrum of **3i** (400 MHz,  $\text{CDCl}_3$ )

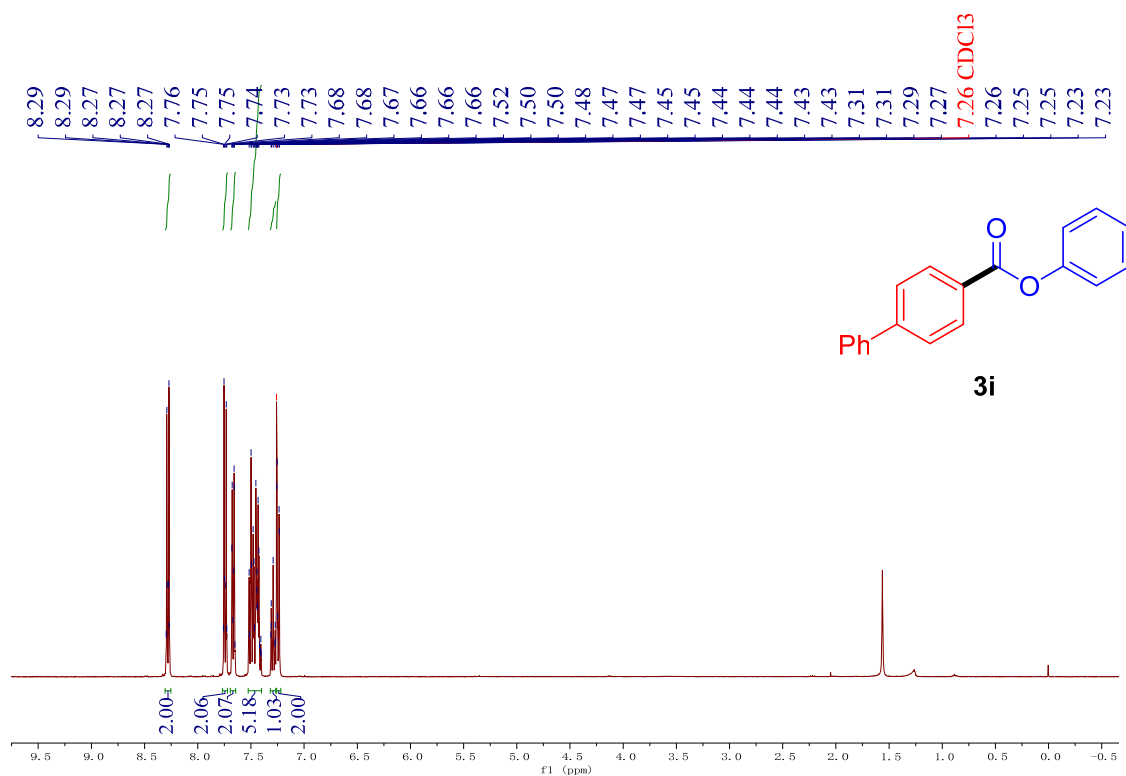

**Figure S22.**  $^{13}\text{C}$  NMR spectrum of **3i** (100 MHz,  $\text{CDCl}_3$ )

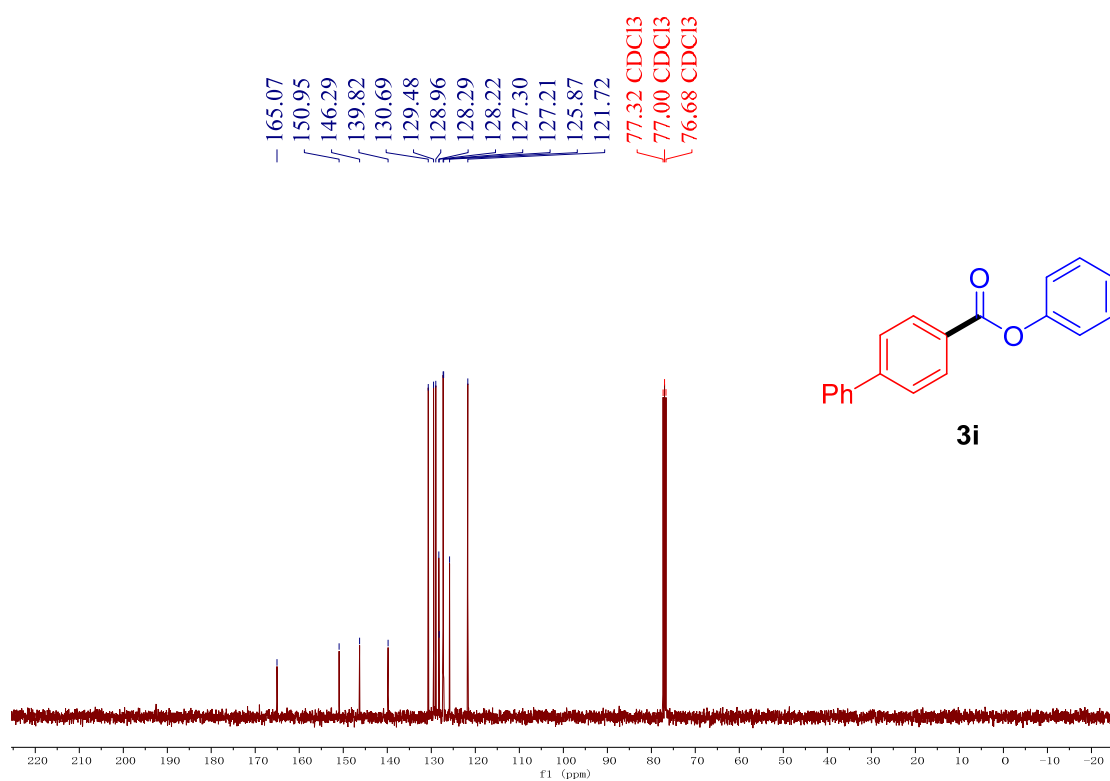

**Figure S23.**  $^1\text{H}$  NMR spectrum of **3j** (400 MHz,  $\text{CDCl}_3$ )

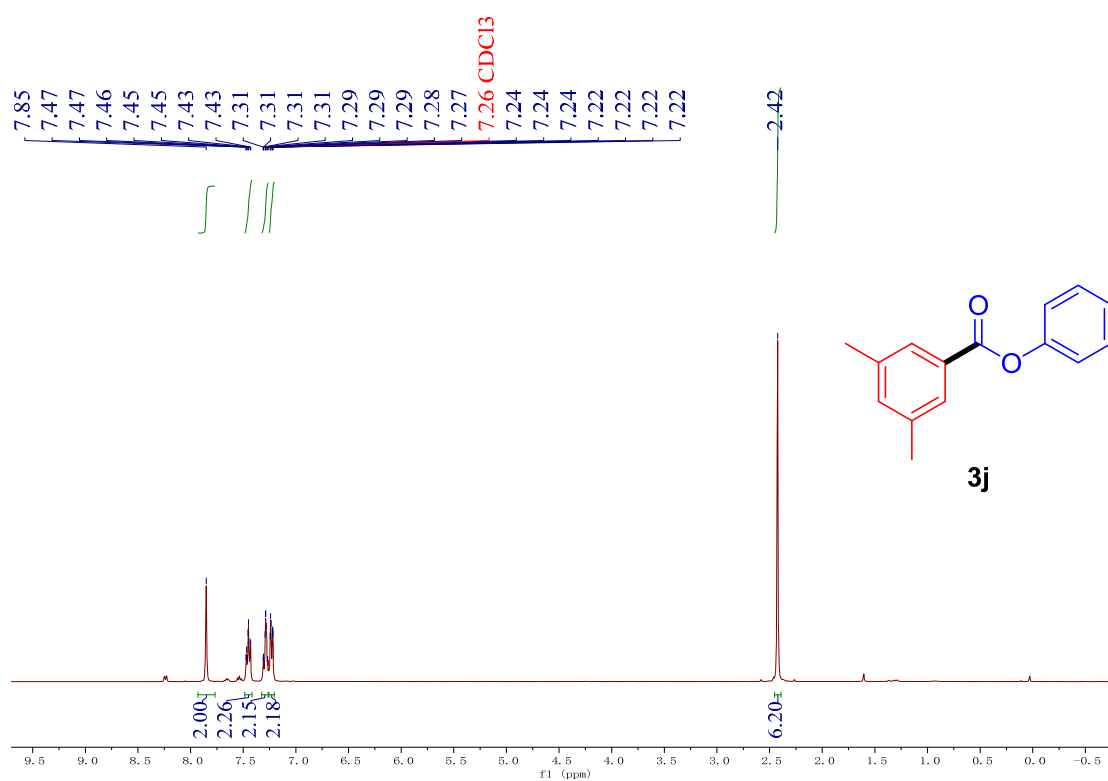

**Figure S24.**  $^{13}\text{C}$  NMR spectrum of **3j** (100 MHz,  $\text{CDCl}_3$ )

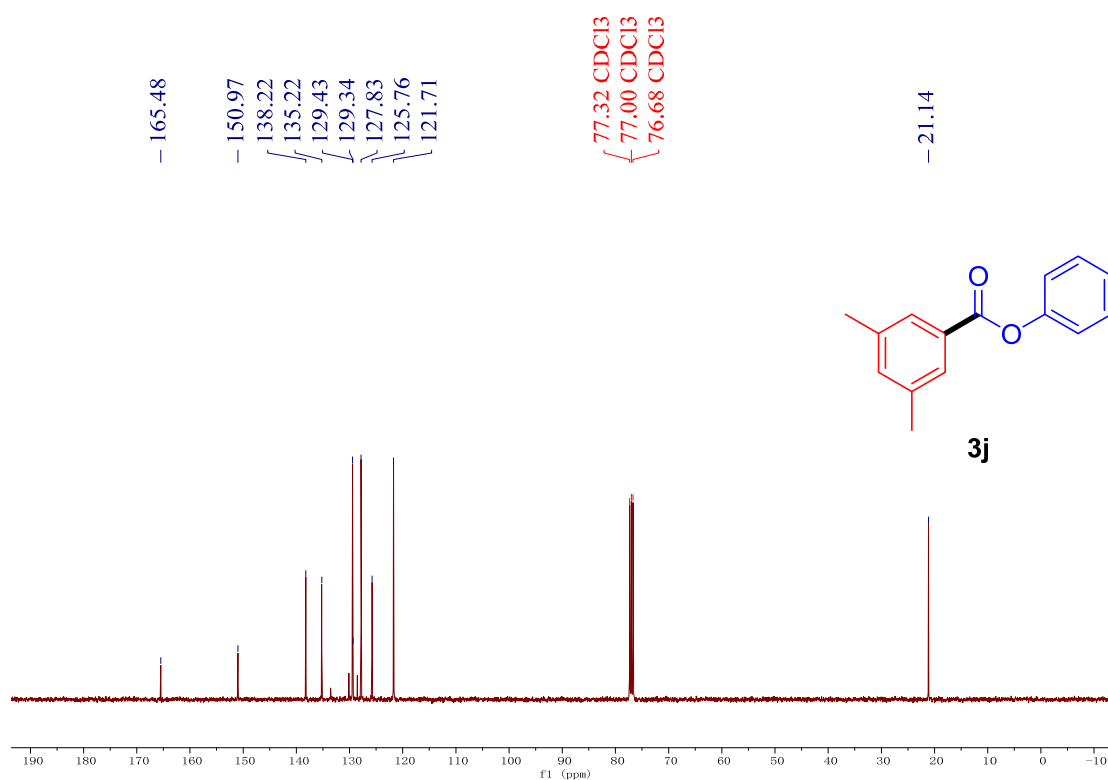

**Figure S25.**  $^1\text{H}$  NMR spectrum of **3k** (400 MHz,  $\text{CDCl}_3$ )

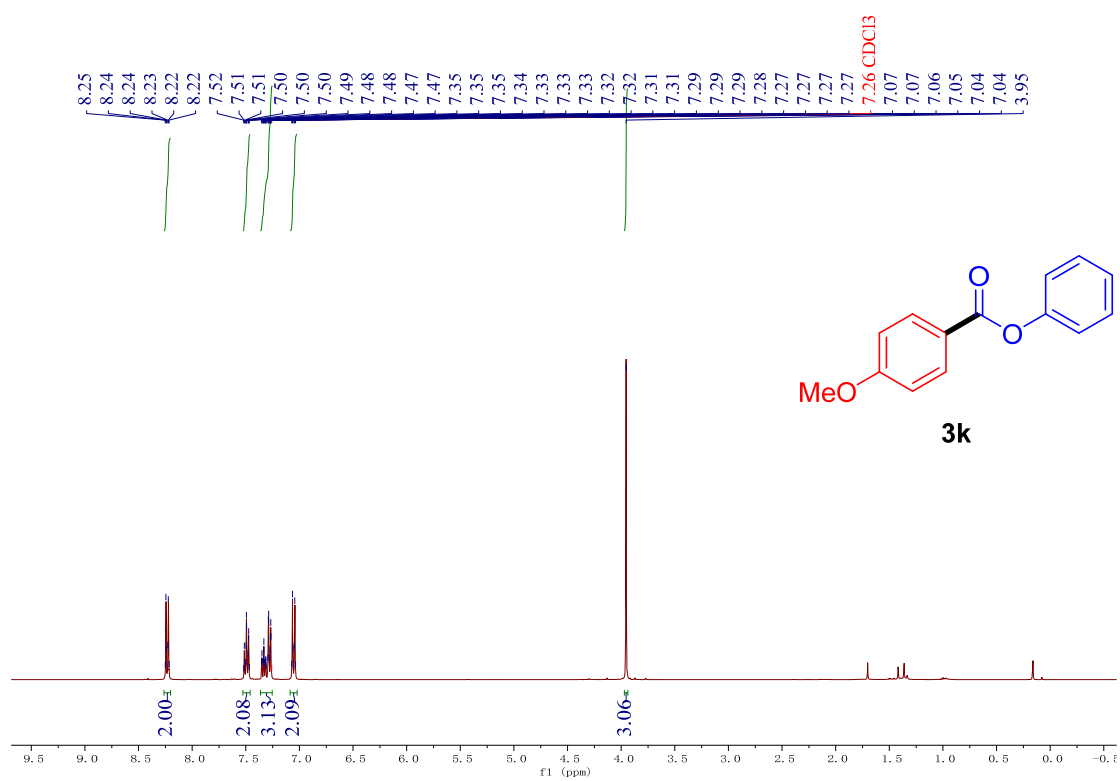

**Figure S26.**  $^{13}\text{C}$  NMR spectrum of **3k** (100 MHz,  $\text{CDCl}_3$ )

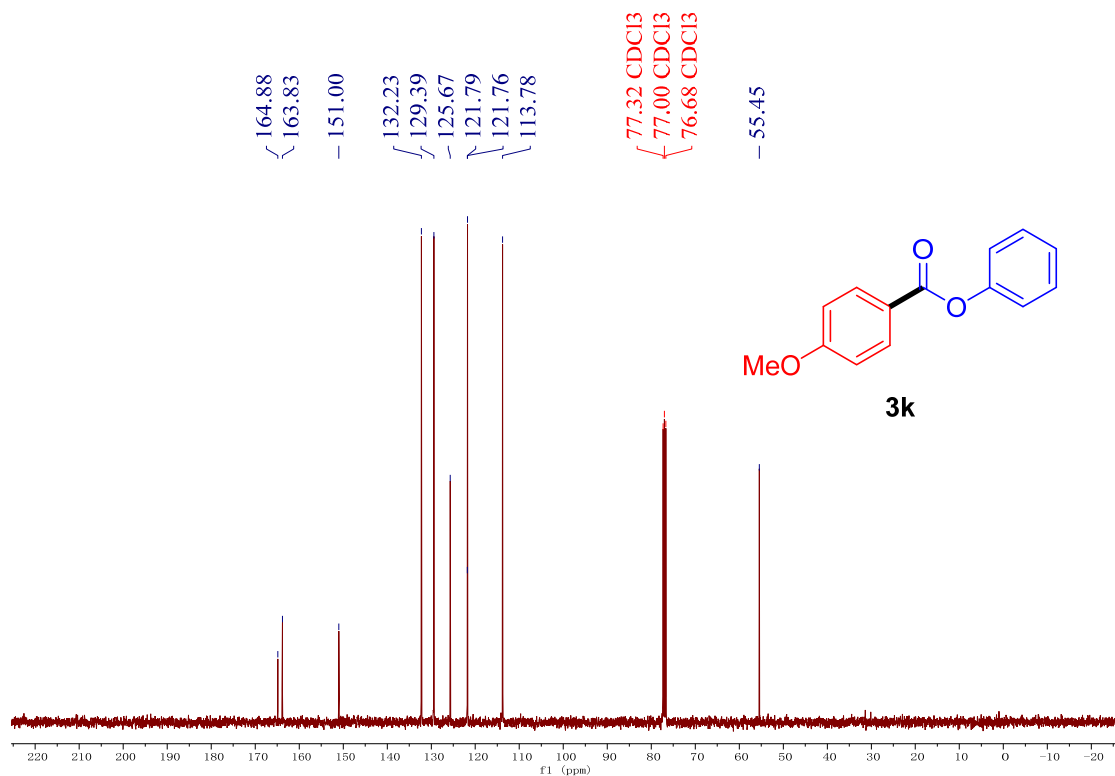

**Figure S27.**  $^1\text{H}$  NMR spectrum of **3I** (400 MHz,  $\text{CDCl}_3$ )

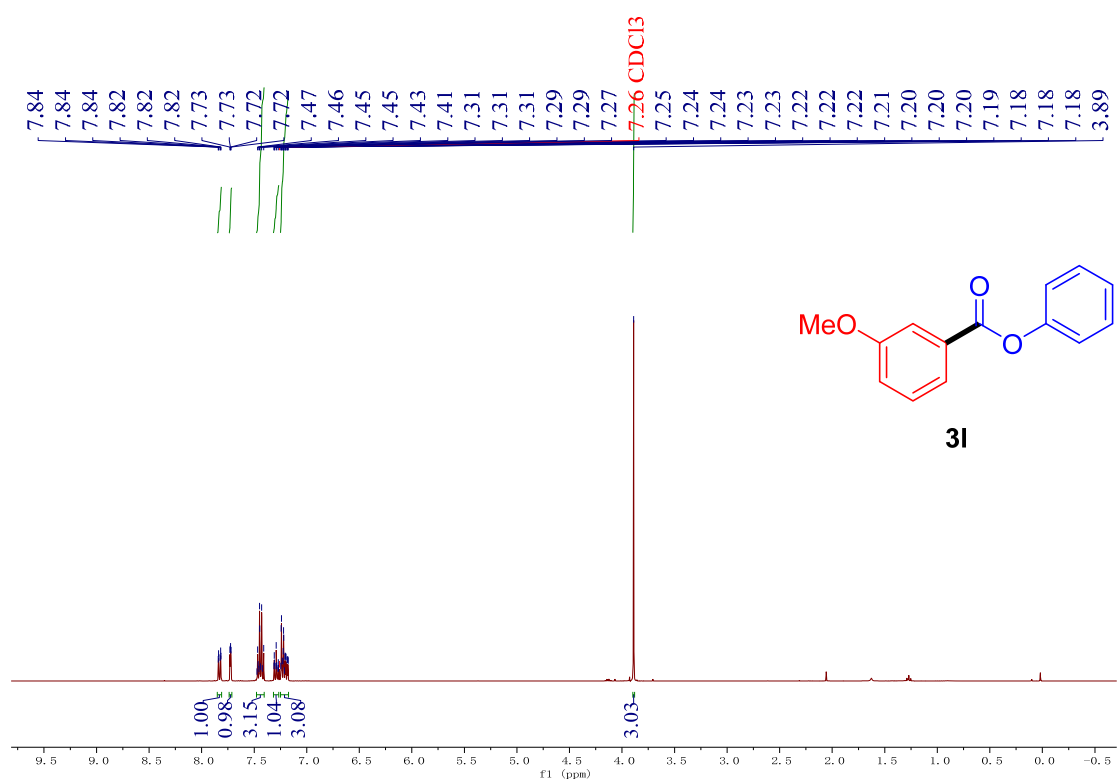

**Figure S28.**  $^{13}\text{C}$  NMR spectrum of **3I** (100 MHz,  $\text{CDCl}_3$ )

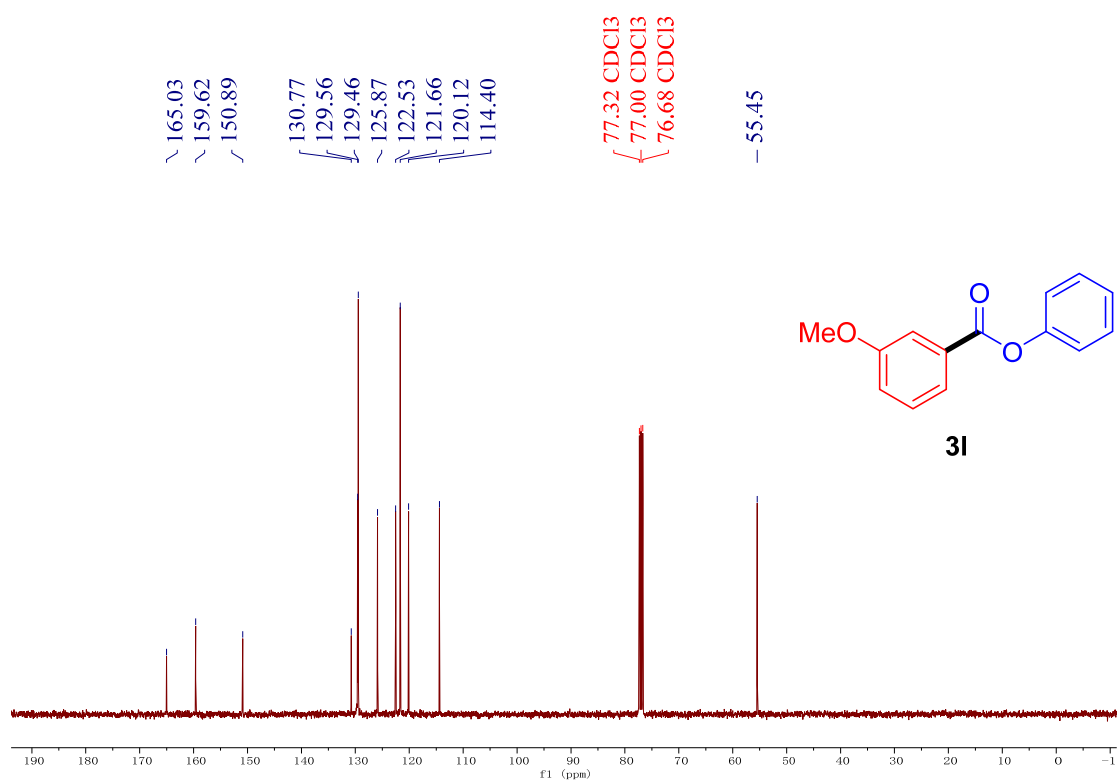

**Figure S29.**  $^1\text{H}$  NMR spectrum of **3m** (400 MHz,  $\text{CDCl}_3$ )

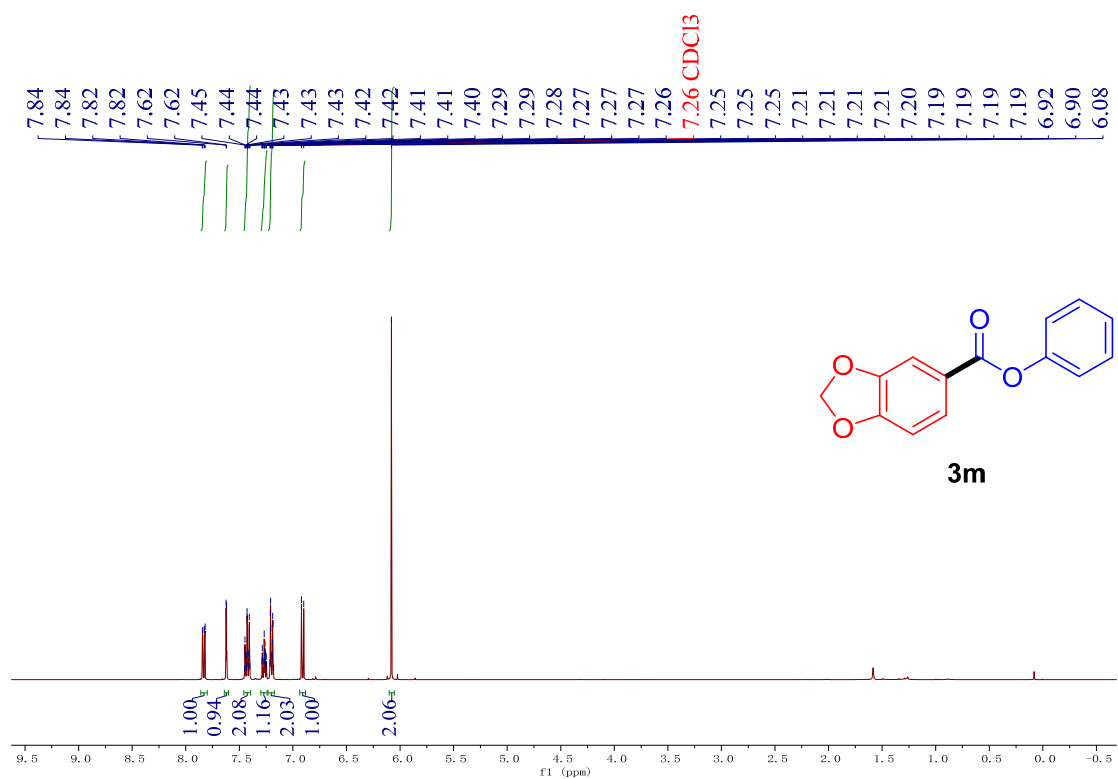

**Figure S30.**  $^{13}\text{C}$  NMR spectrum of **3m** (100 MHz,  $\text{CDCl}_3$ )

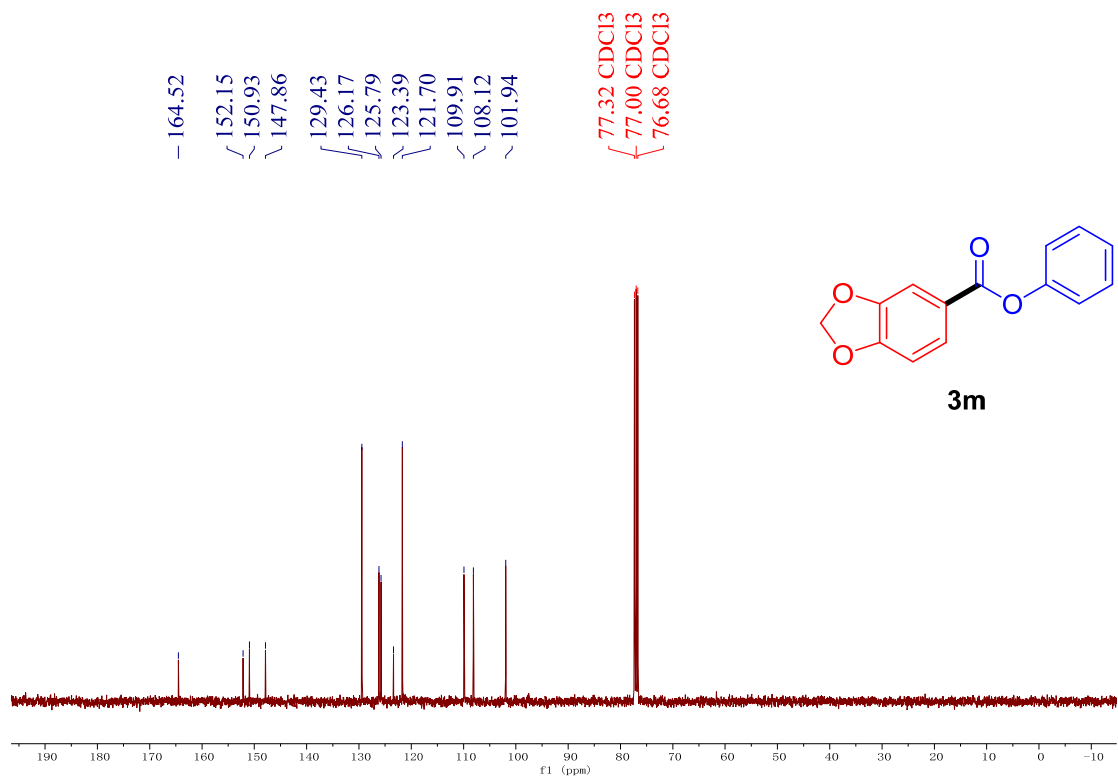

**Figure S31.**  $^1\text{H}$  NMR spectrum of **3n** (400 MHz,  $\text{CDCl}_3$ )

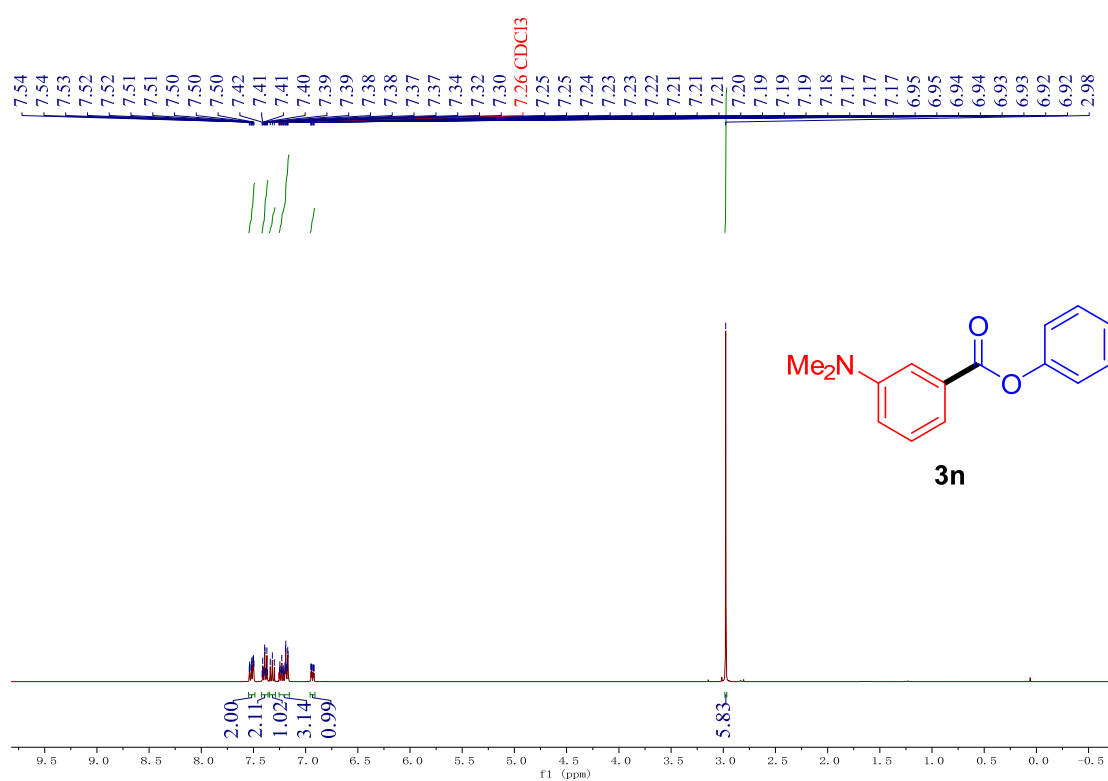

**Figure S32.**  $^{13}\text{C}$  NMR spectrum of **3n** (100 MHz,  $\text{CDCl}_3$ )

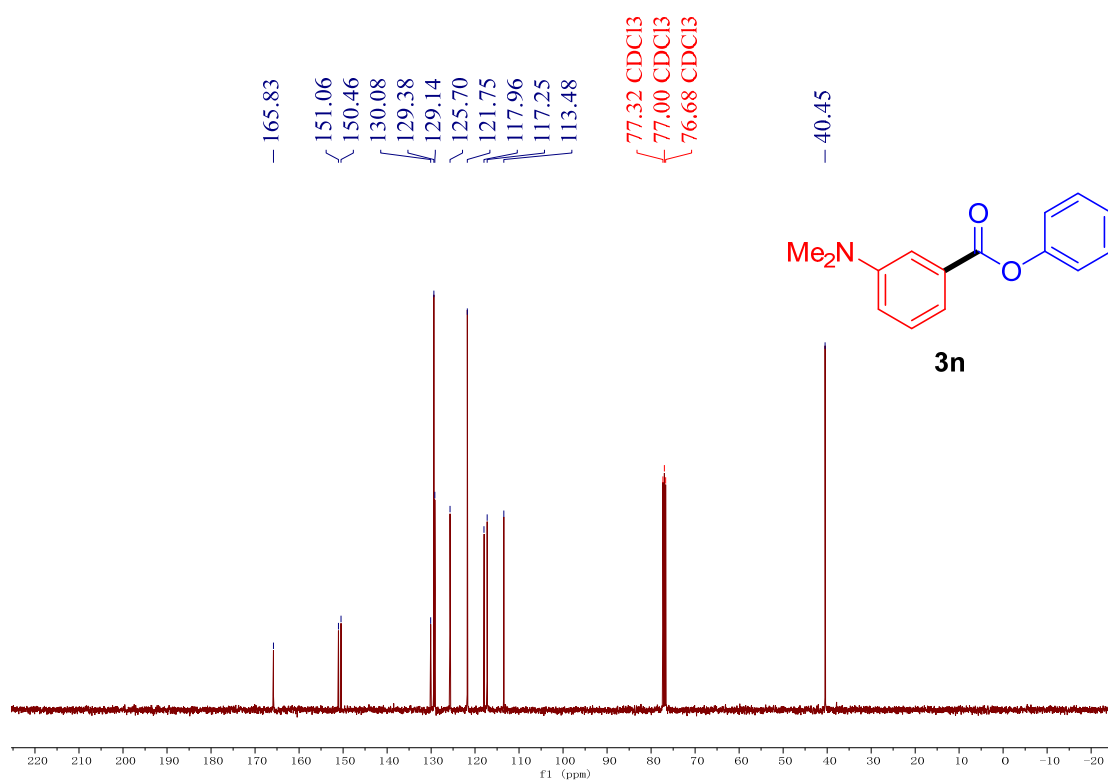

**Figure S33.**  $^1\text{H}$  NMR spectrum of **3o** (400 MHz,  $\text{CDCl}_3$ )

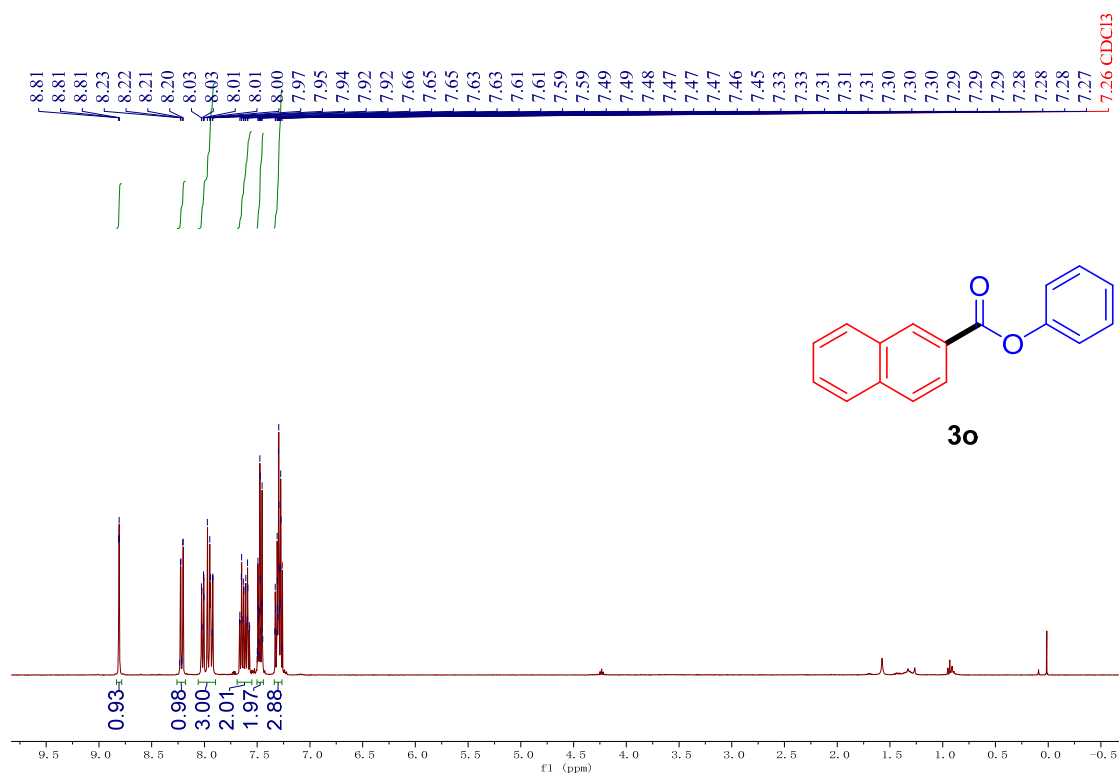

**Figure S34.**  $^{13}\text{C}$  NMR spectrum of **3o** (100 MHz,  $\text{CDCl}_3$ )

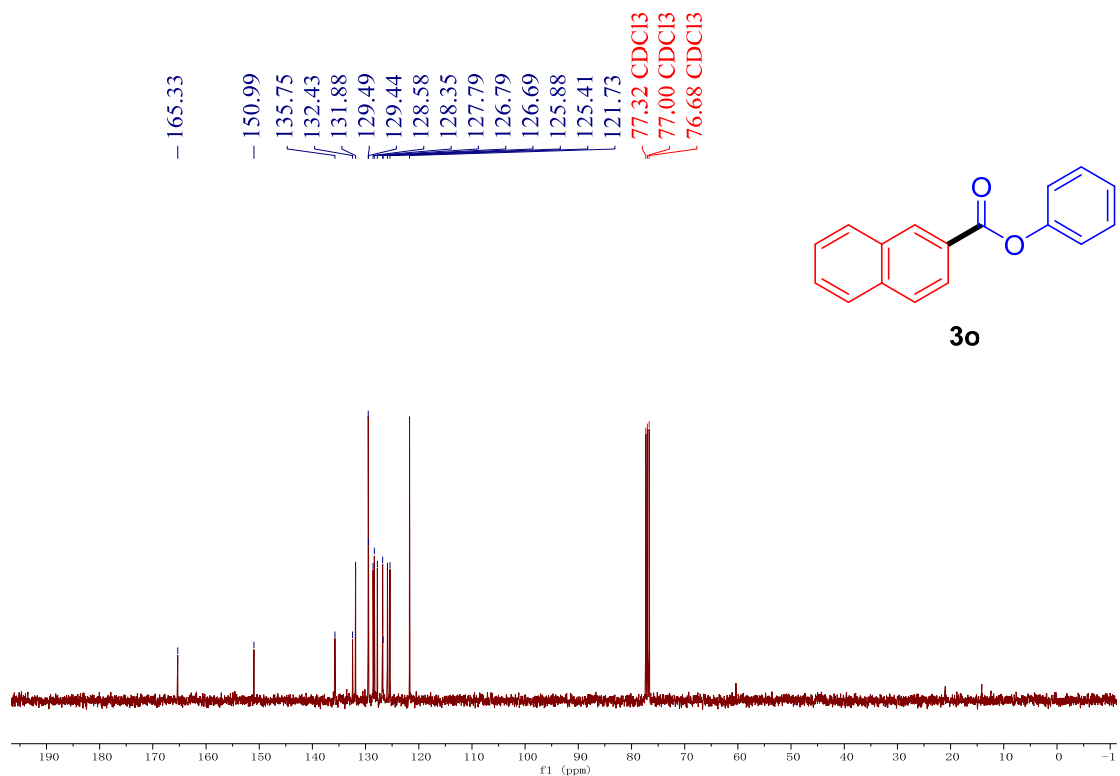



**Figure S35.**  $^1\text{H}$  NMR spectrum of **3p** (400 MHz,  $\text{CDCl}_3$ )

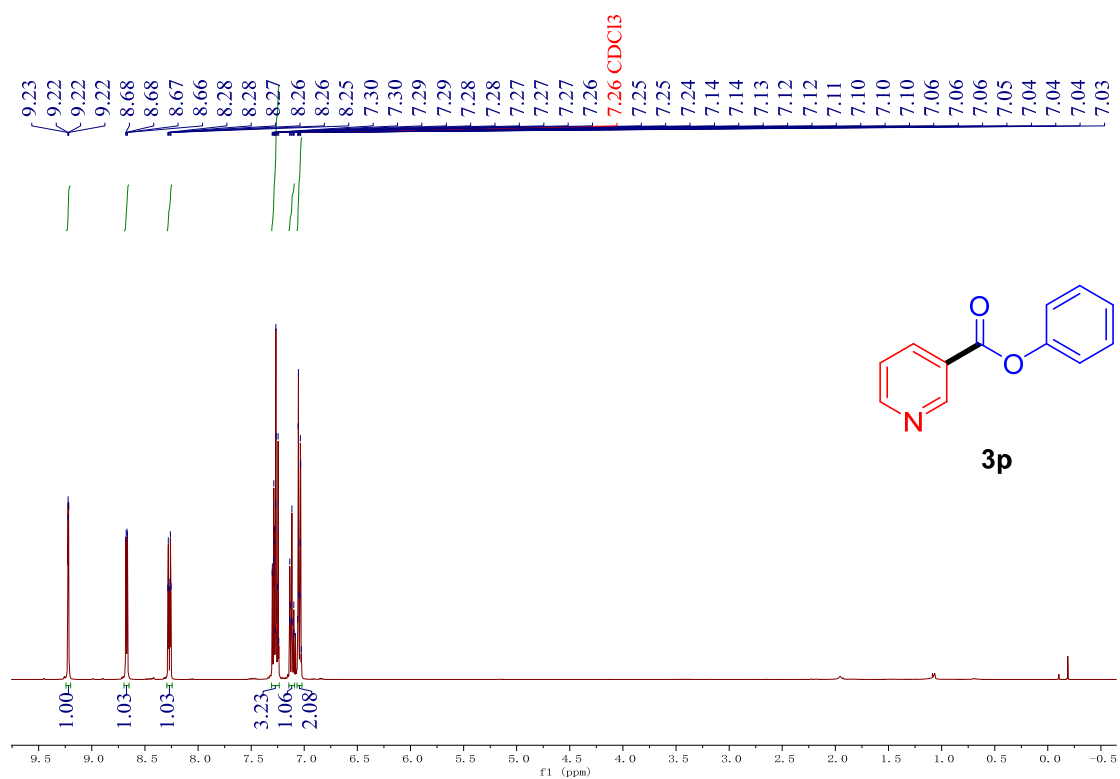

**Figure S36.**  $^{13}\text{C}$  NMR spectrum of **3p** (100 MHz,  $\text{CDCl}_3$ )

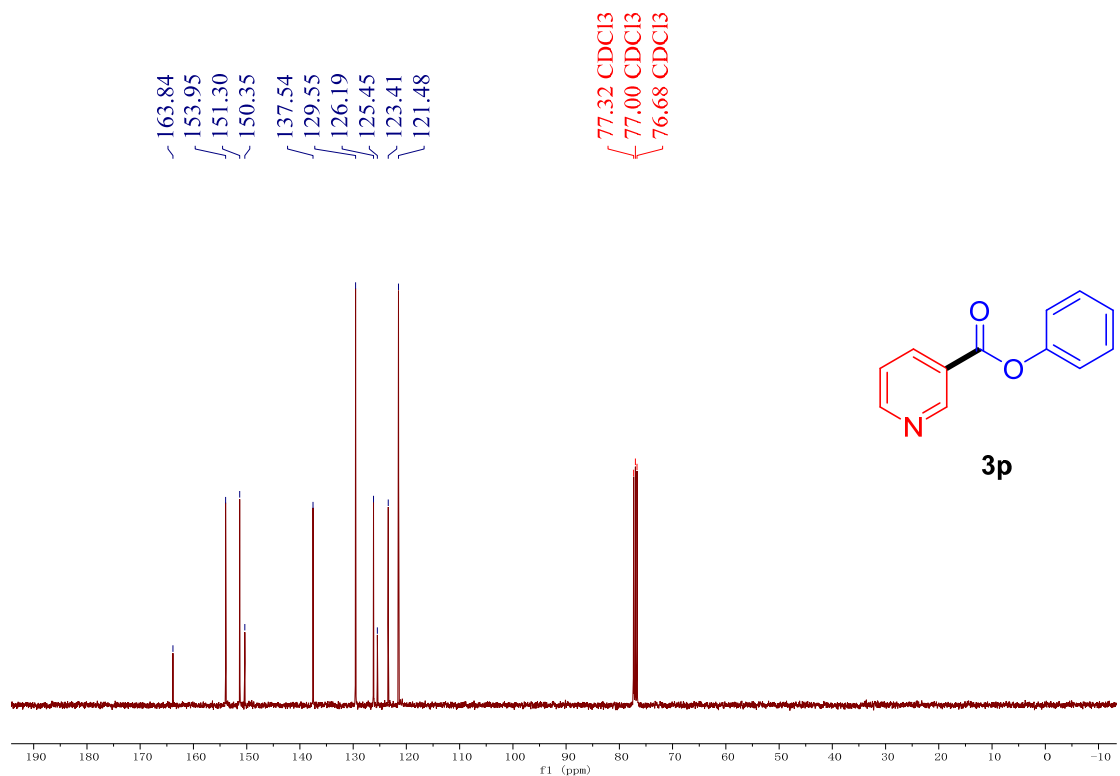

**Figure S37.**  $^1\text{H}$  NMR spectrum of **3q** (400 MHz,  $\text{CDCl}_3$ )

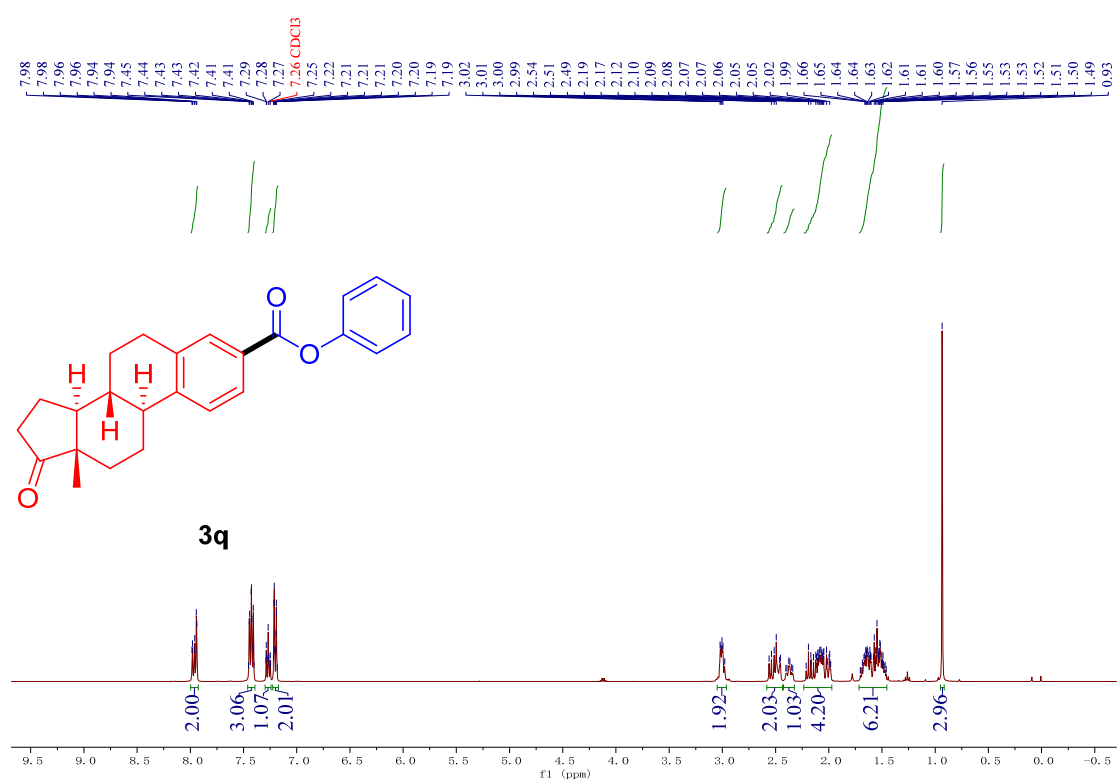

**Figure S38.**  $^{13}\text{C}$  NMR spectrum of **3q** (100 MHz,  $\text{CDCl}_3$ )

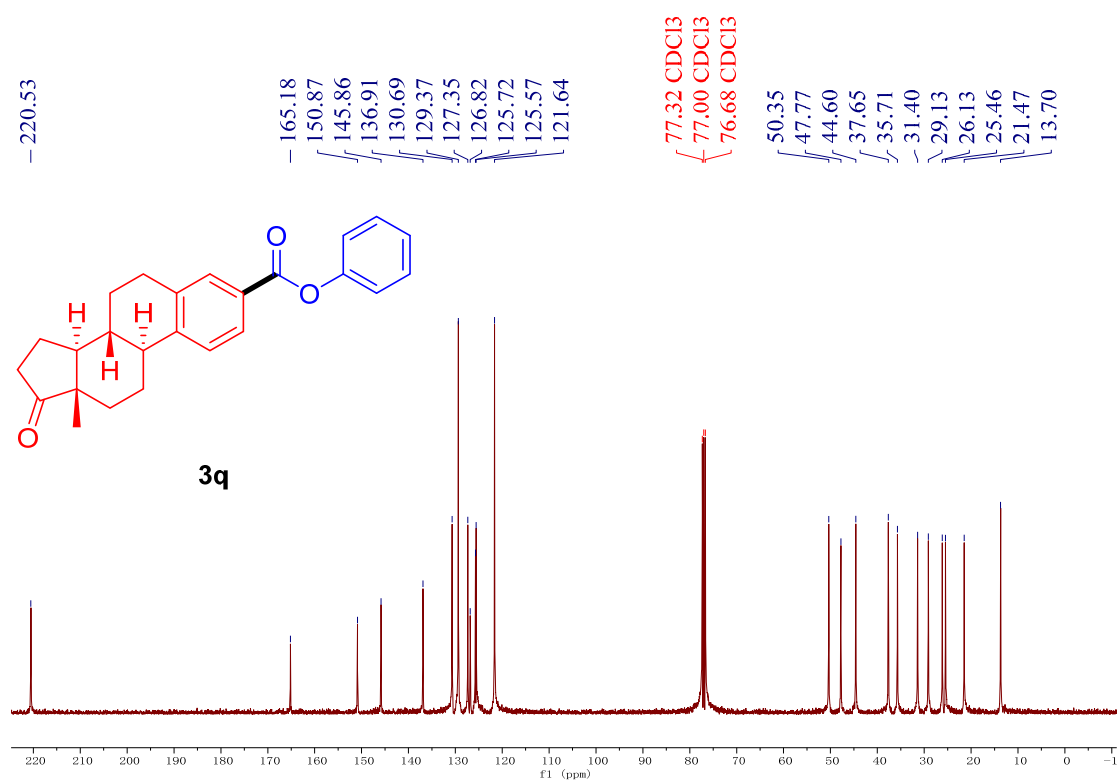

**Figure S39.**  $^1\text{H}$  NMR spectrum of **3r** (400 MHz,  $\text{CDCl}_3$ )

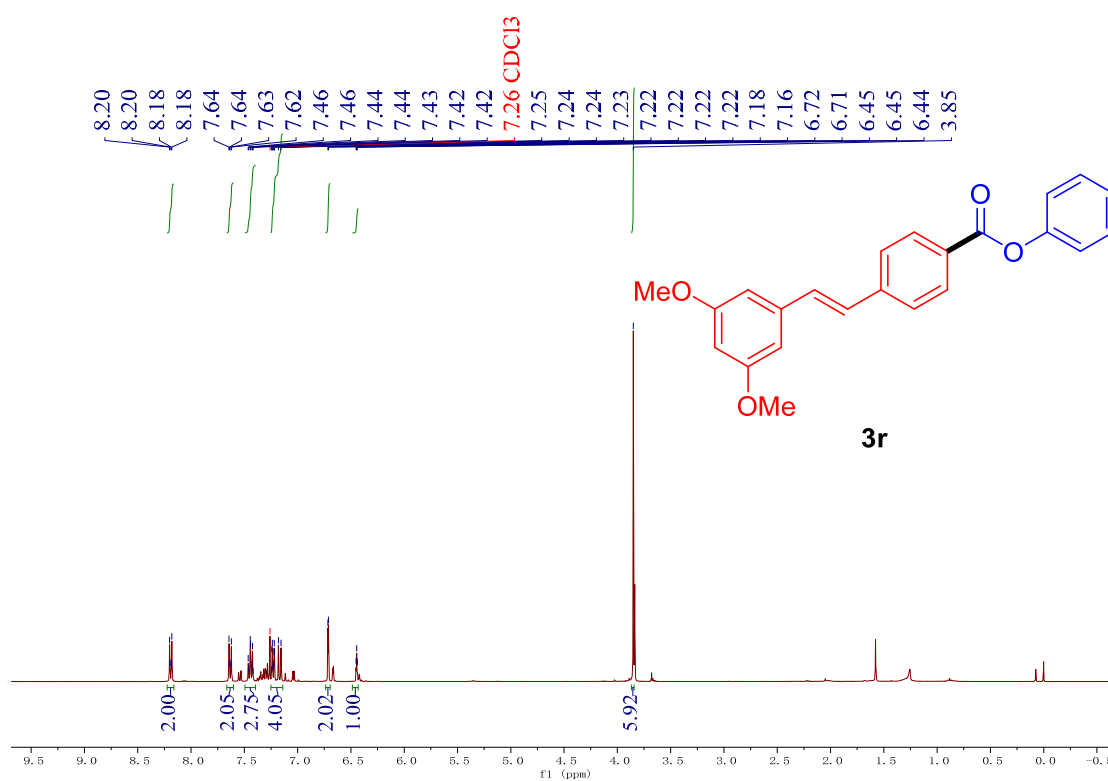

**Figure S40.**  $^{13}\text{C}$  NMR spectrum of **3r** (100 MHz,  $\text{CDCl}_3$ )

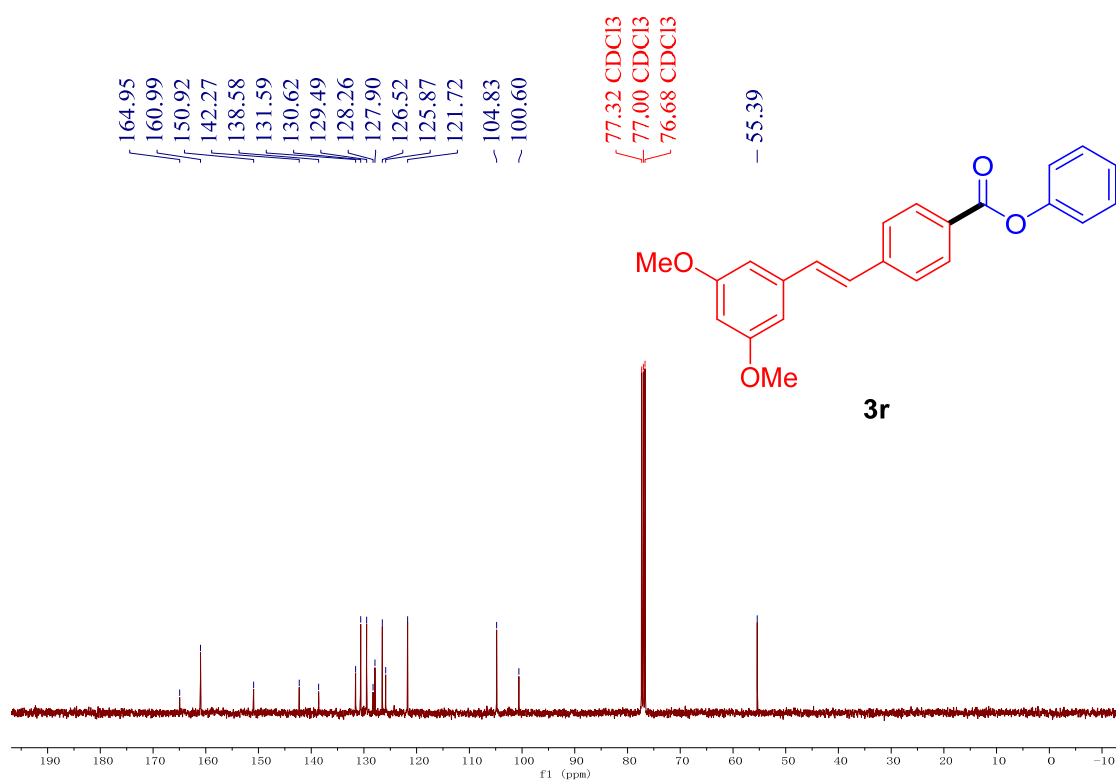

**Figure S41.**  $^1\text{H}$  NMR spectrum of **4b** (400 MHz,  $\text{CDCl}_3$ )

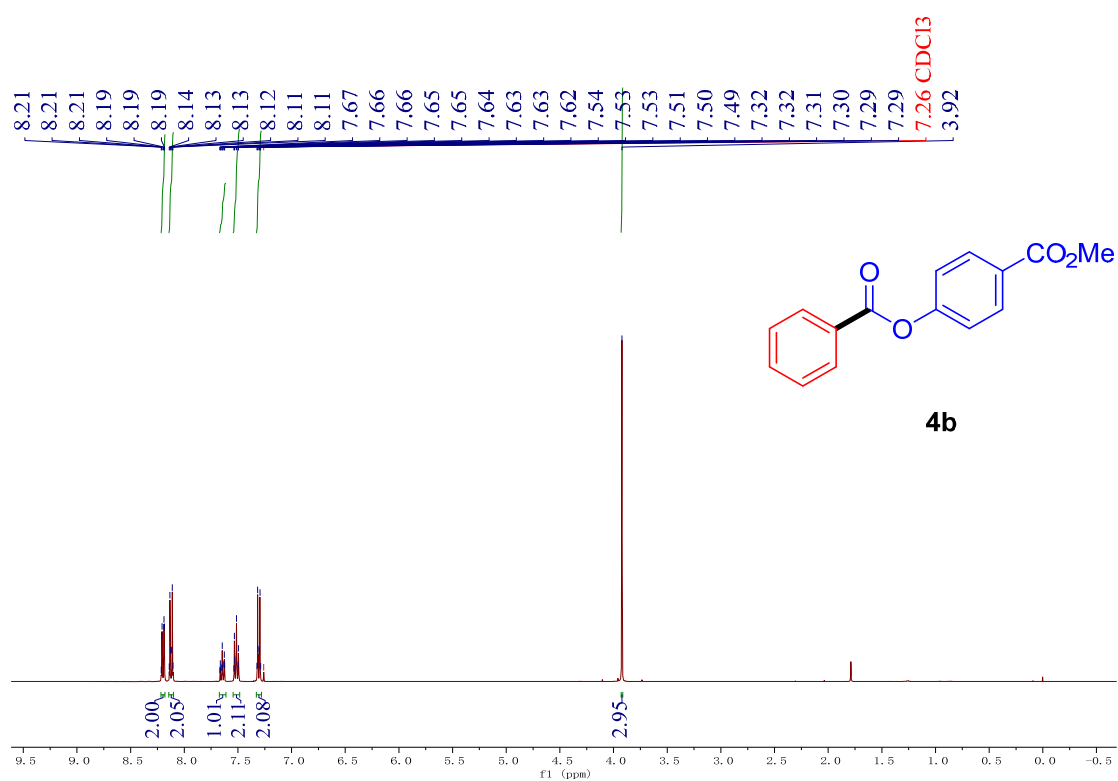

**Figure S42.**  $^{13}\text{C}$  NMR spectrum of **4b** (100 MHz,  $\text{CDCl}_3$ )

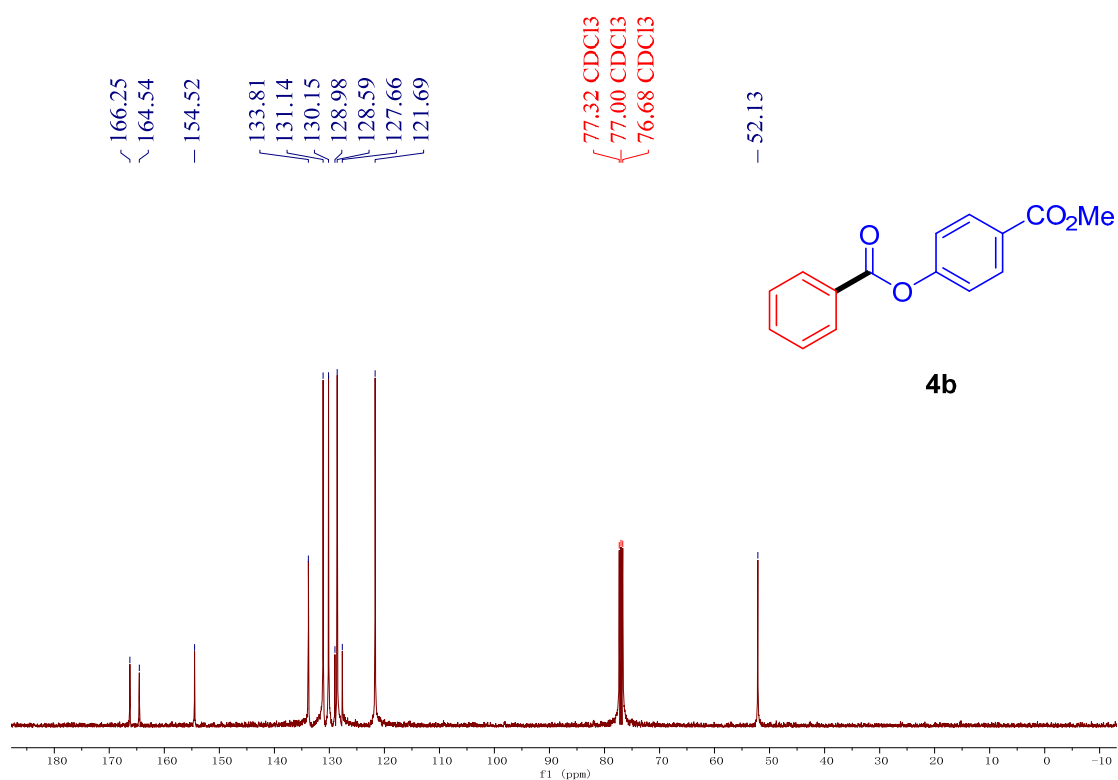

**Figure S43.**  $^1\text{H}$  NMR spectrum of **4c** (400 MHz,  $\text{CDCl}_3$ )

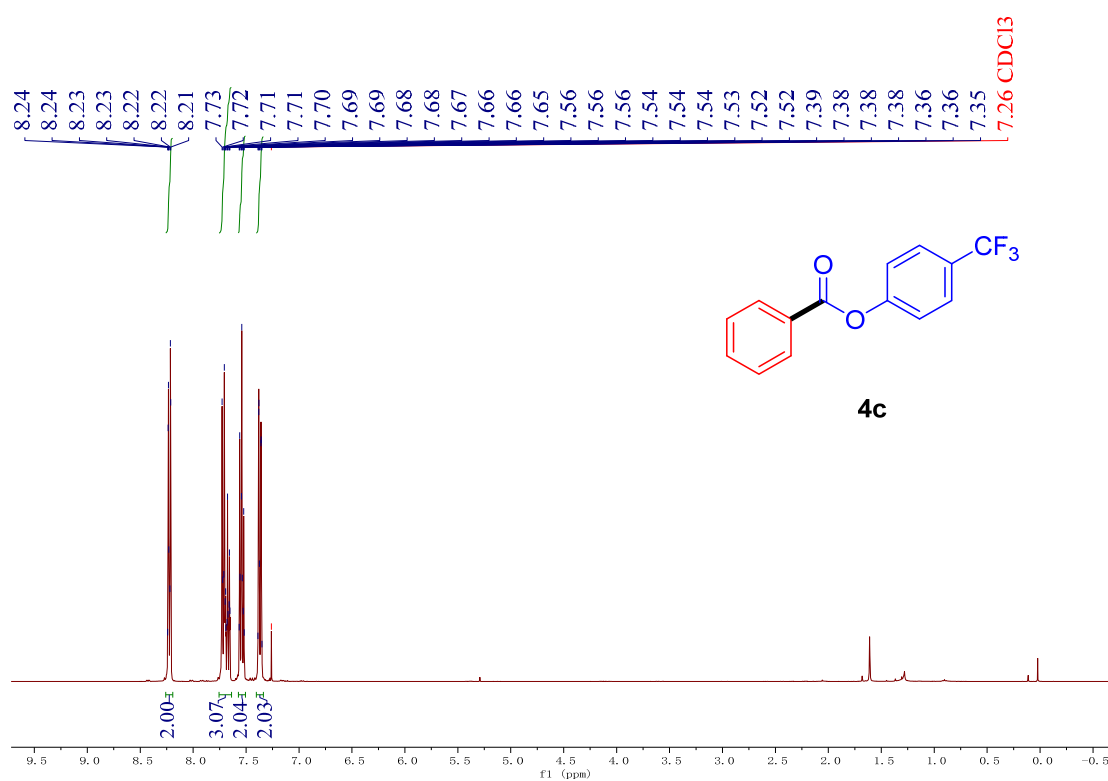

**Figure S44.**  $^{13}\text{C}$  NMR spectrum of **4c** (100 MHz,  $\text{CDCl}_3$ )

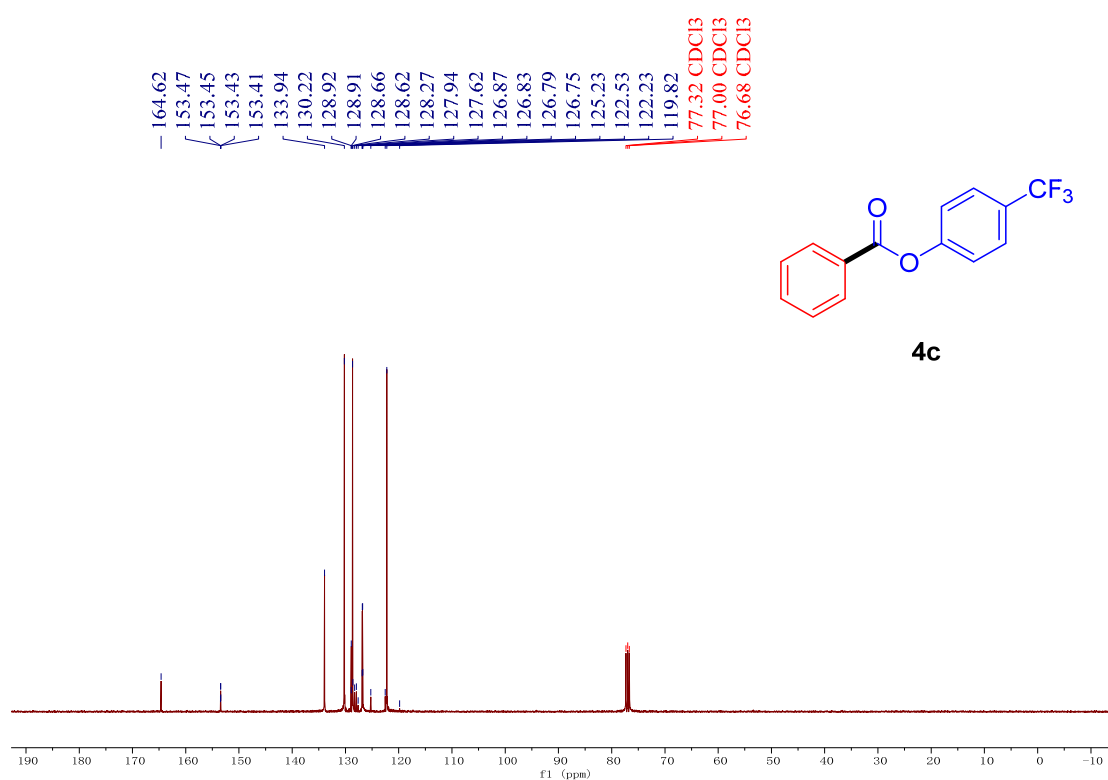

**Figure S45.**  $^{19}\text{F}$  NMR spectrum of **4c** (376 MHz,  $\text{CDCl}_3$ )

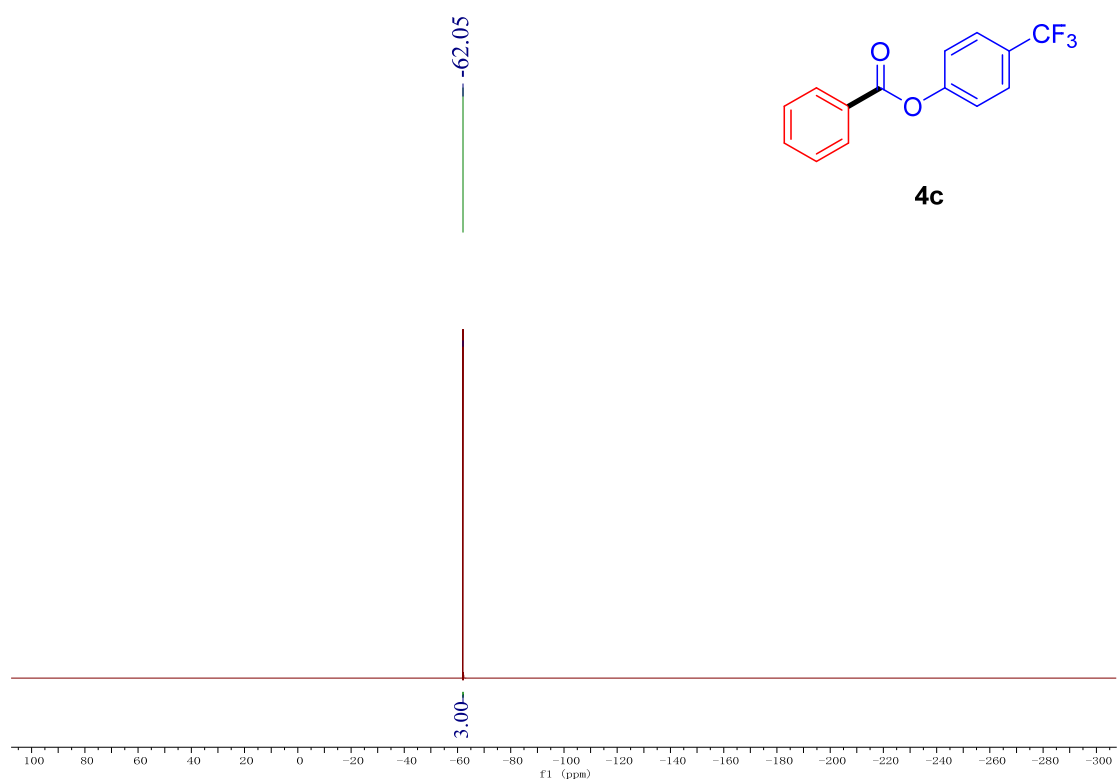

**Figure S46.**  $^1\text{H}$  NMR spectrum of **4d** (400 MHz,  $\text{CDCl}_3$ )

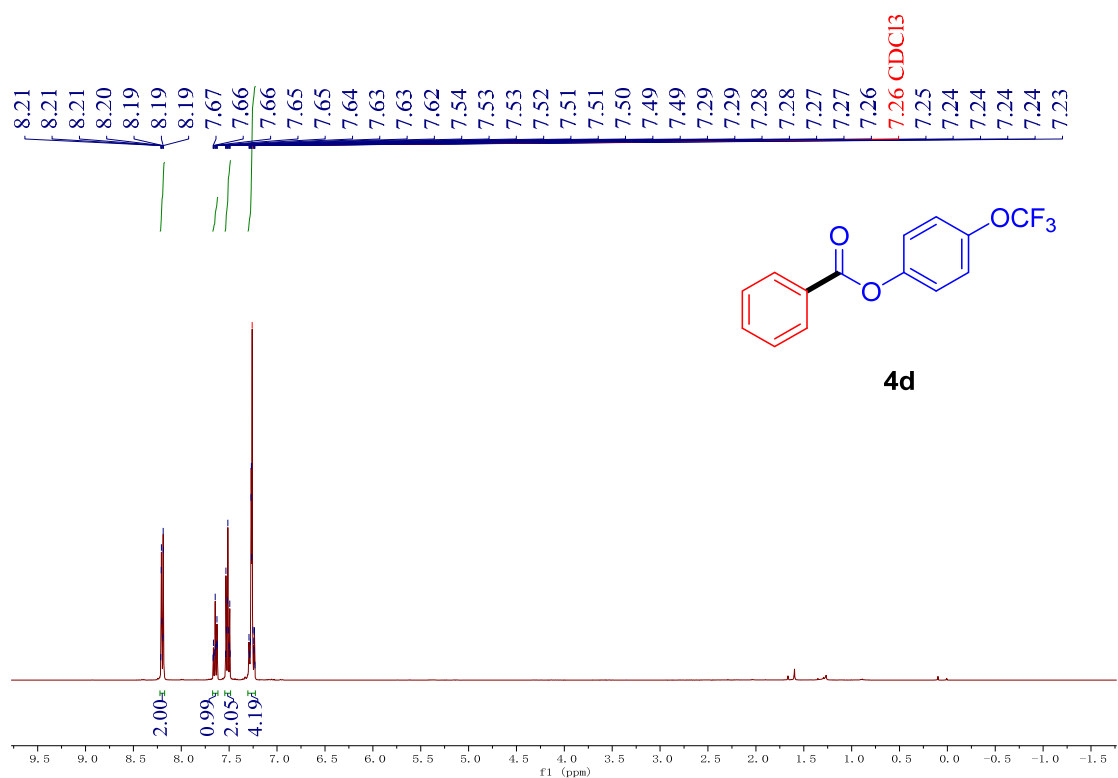

**Figure S47.**  $^{13}\text{C}$  NMR spectrum of **4d** (100 MHz,  $\text{CDCl}_3$ )

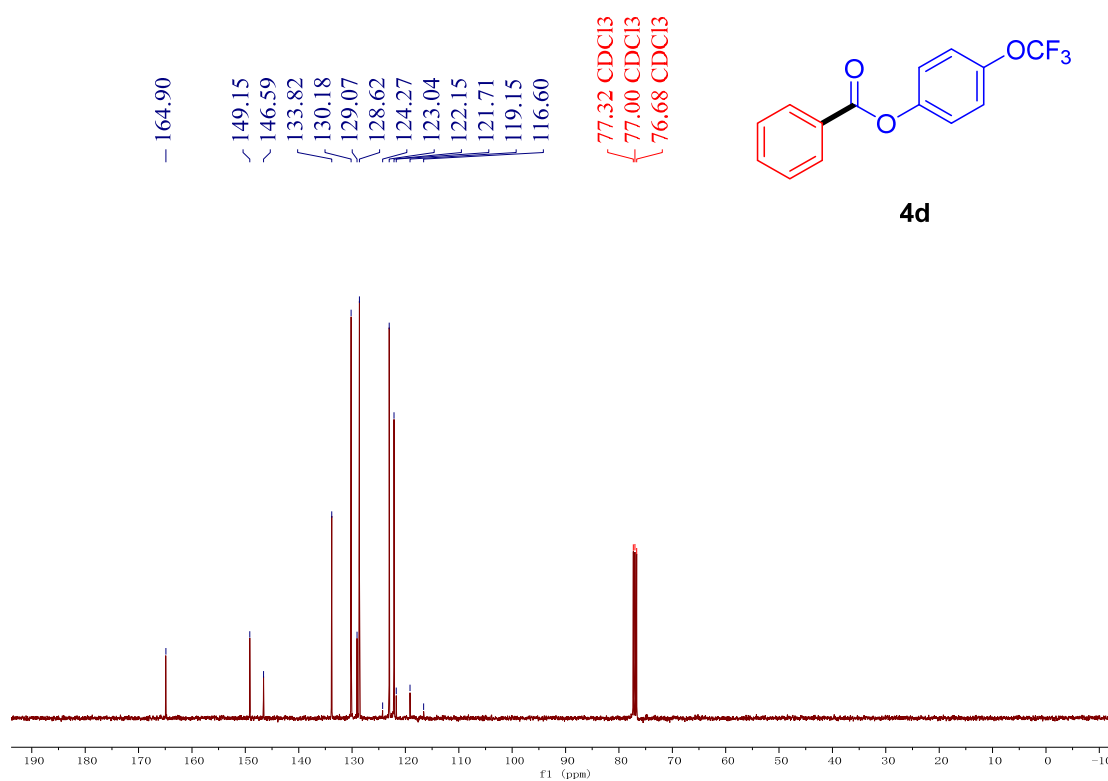

**Figure S48.**  $^{19}\text{F}$  NMR spectrum of **4d** (376 MHz,  $\text{CDCl}_3$ )

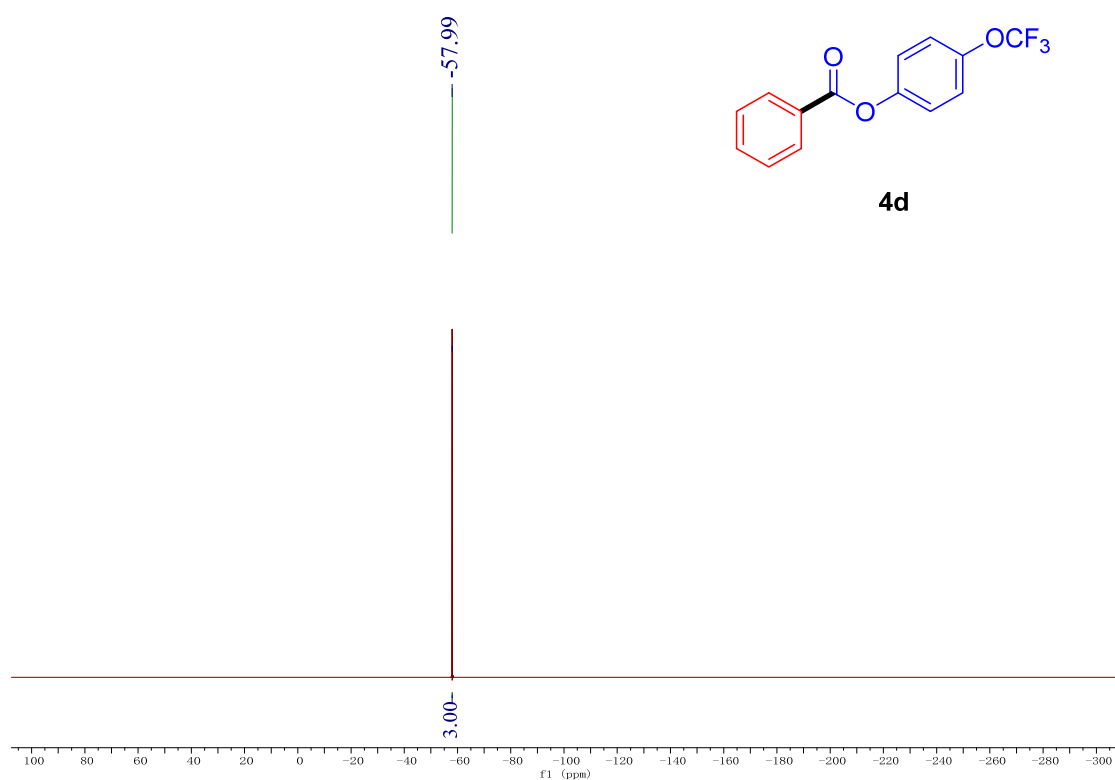

**Figure S49.**  $^1\text{H}$  NMR spectrum of **4e** (400 MHz,  $\text{CDCl}_3$ )

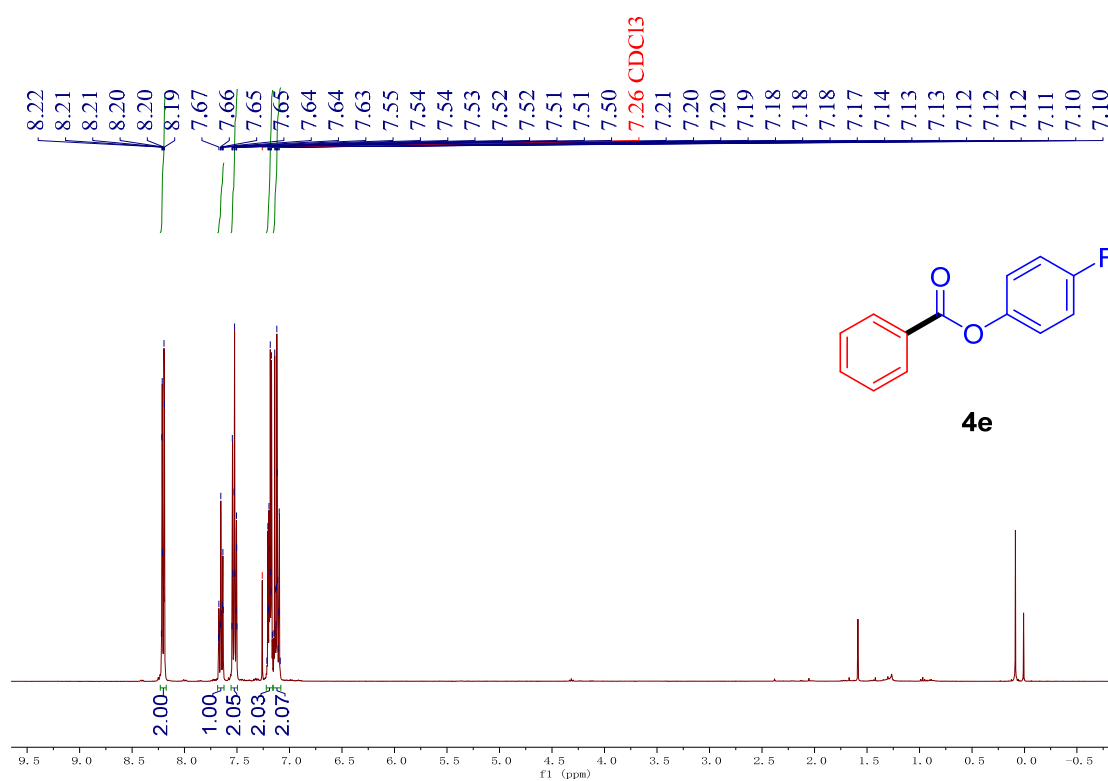

**Figure S50.**  $^{13}\text{C}$  NMR spectrum of **4e** (100 MHz,  $\text{CDCl}_3$ )

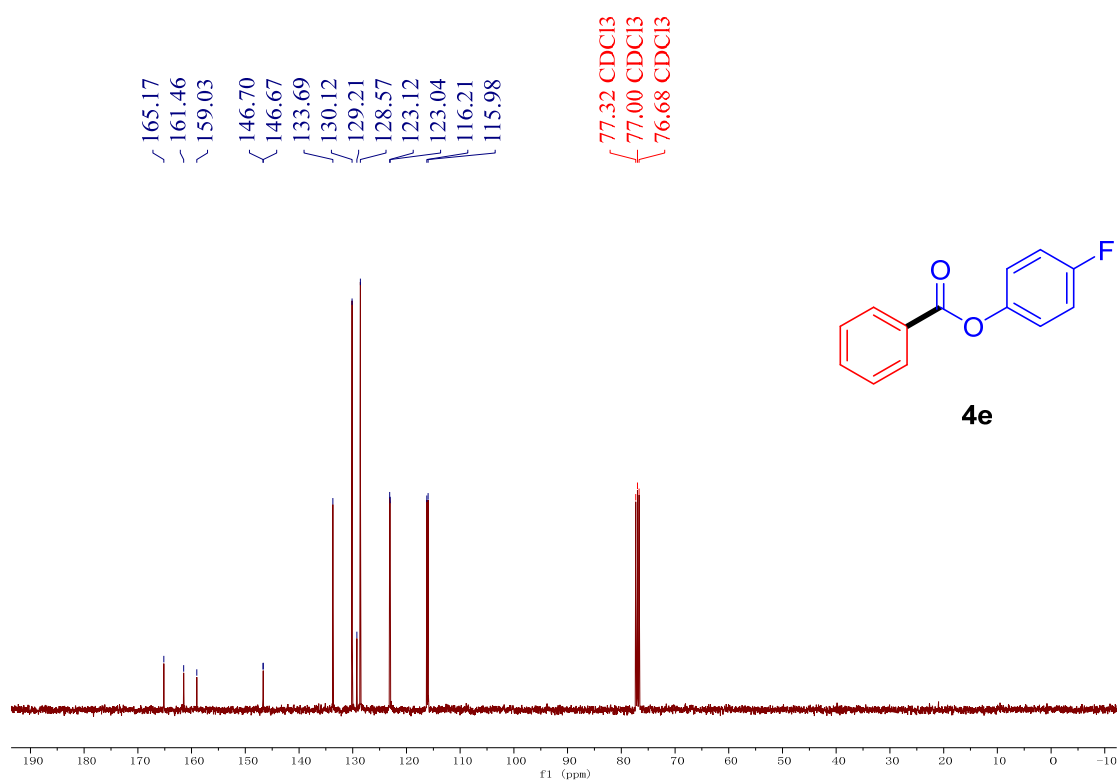



**Figure S51.**  $^{19}\text{F}$  NMR spectrum of **4e** (376 MHz,  $\text{CDCl}_3$ )

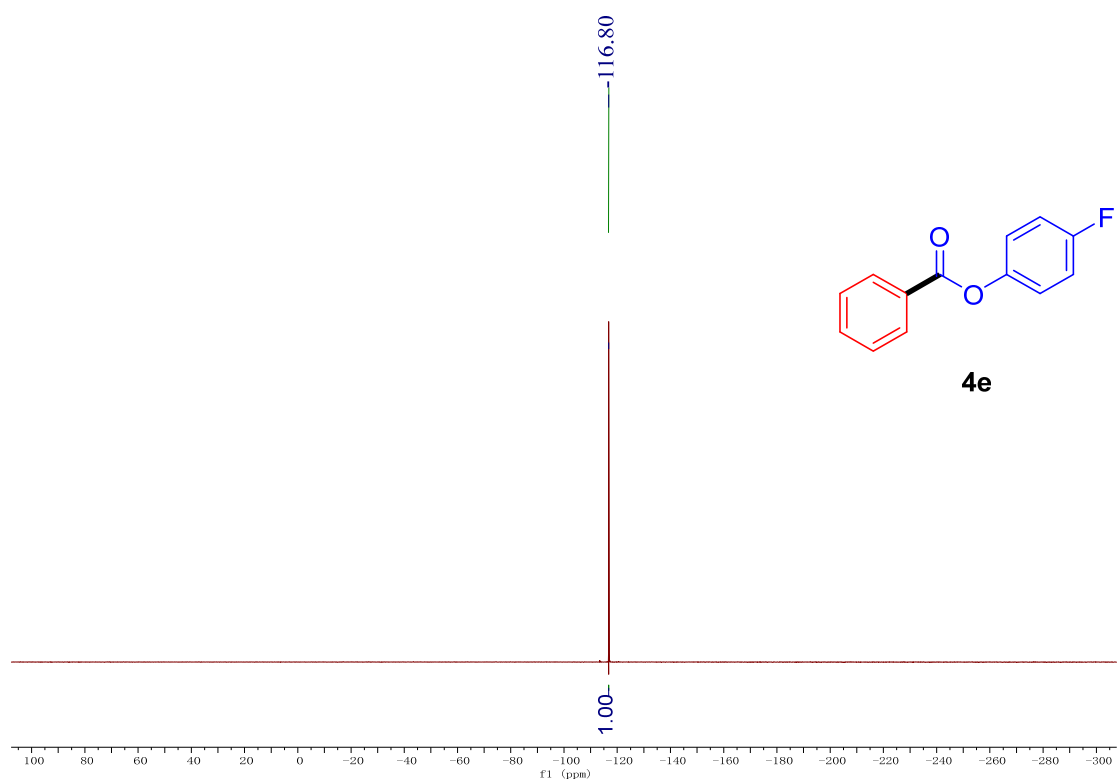

**Figure S52.**  $^1\text{H}$  NMR spectrum of **4f** (400 MHz,  $\text{CDCl}_3$ )

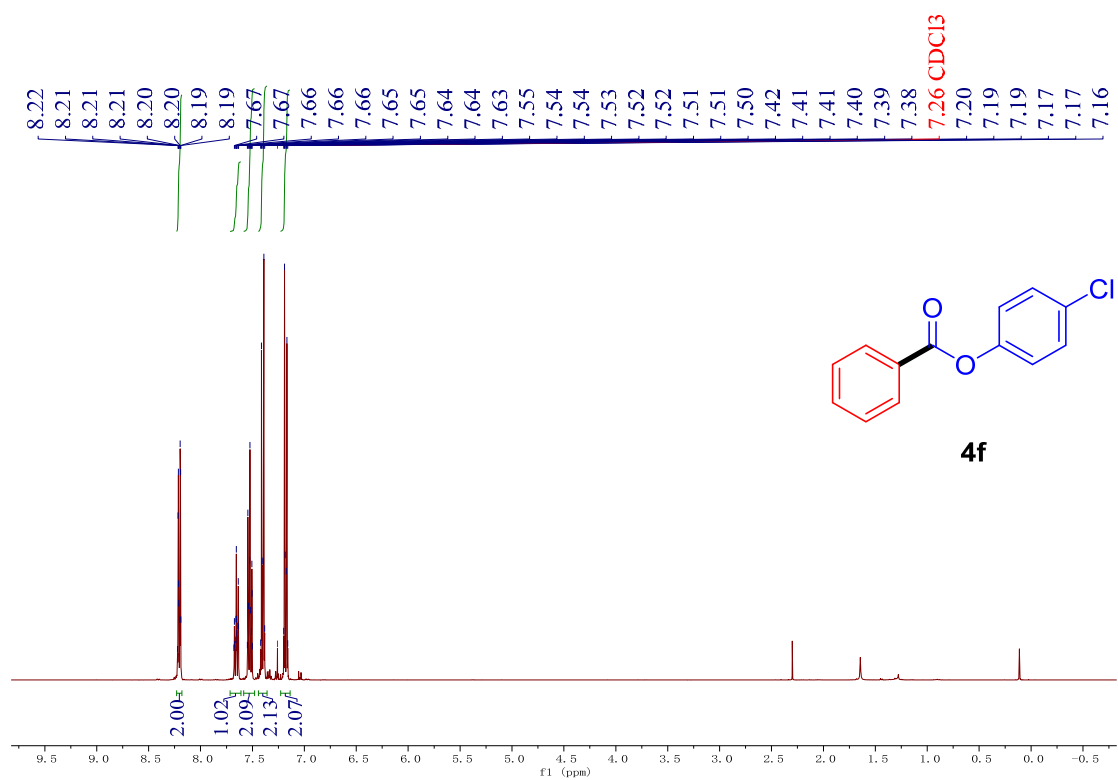

**Figure S53.**  $^{13}\text{C}$  NMR spectrum of **4f** (100 MHz,  $\text{CDCl}_3$ )

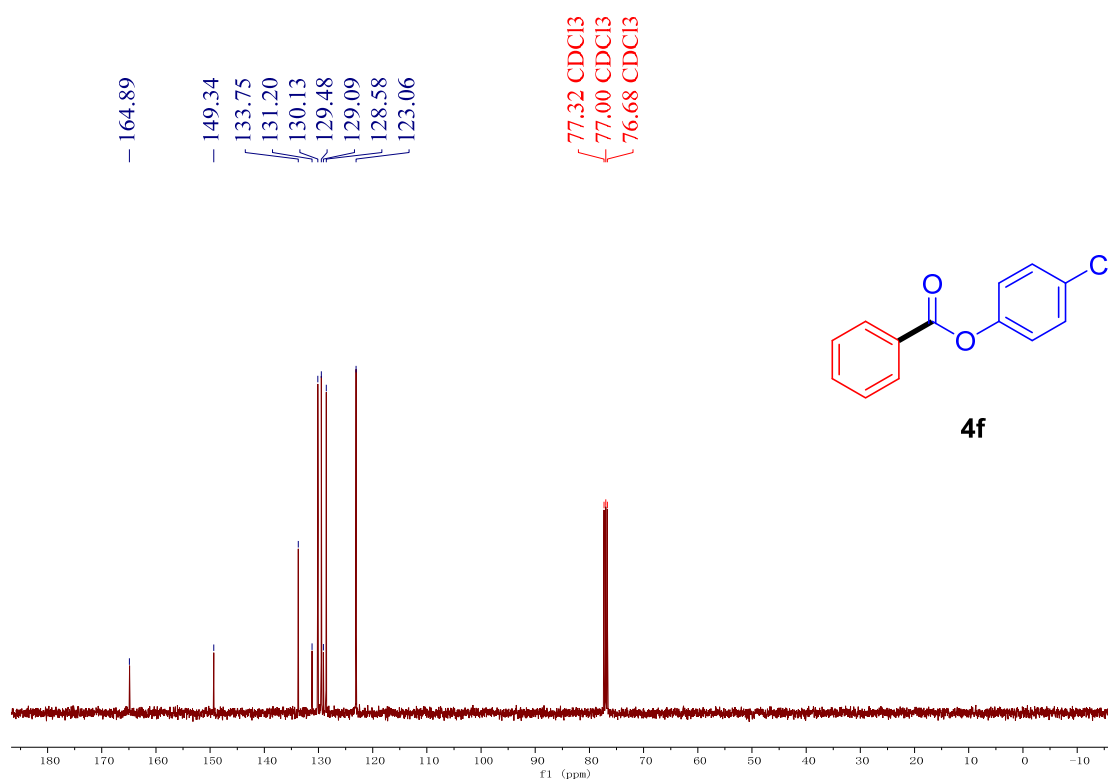

**Figure S54.**  $^1\text{H}$  NMR spectrum of **4g** (400 MHz,  $\text{CDCl}_3$ )

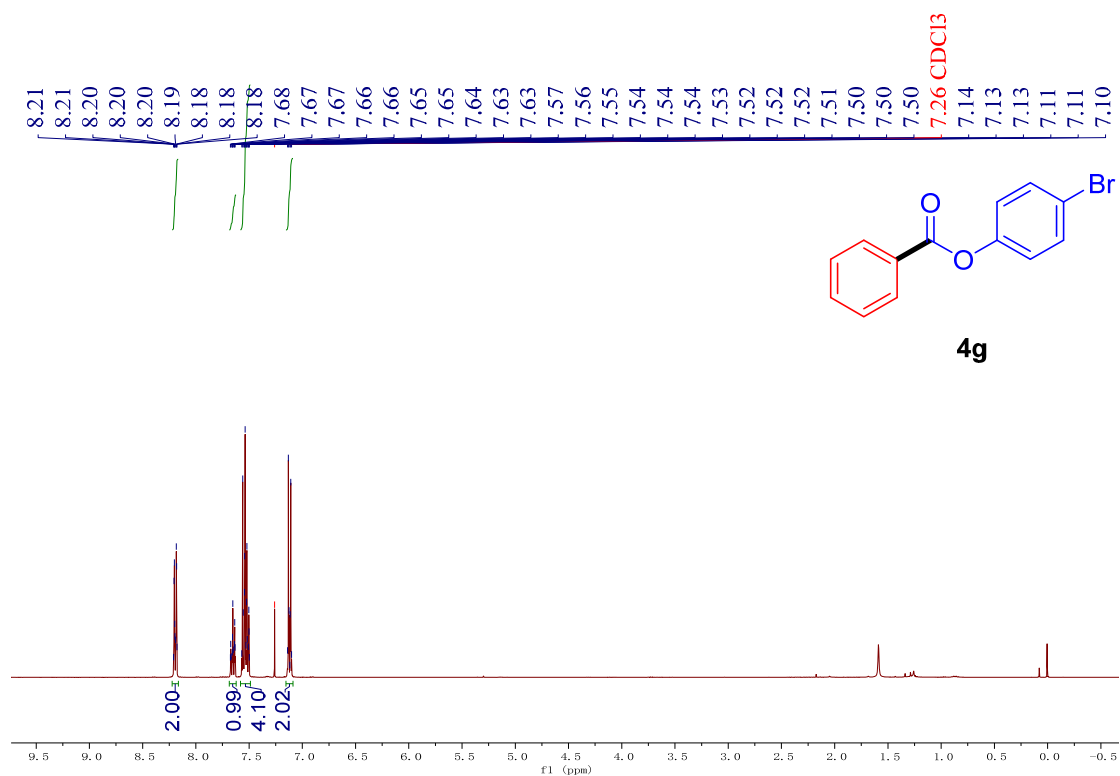

**Figure S55.**  $^{13}\text{C}$  NMR spectrum of **4g** (100 MHz,  $\text{CDCl}_3$ )

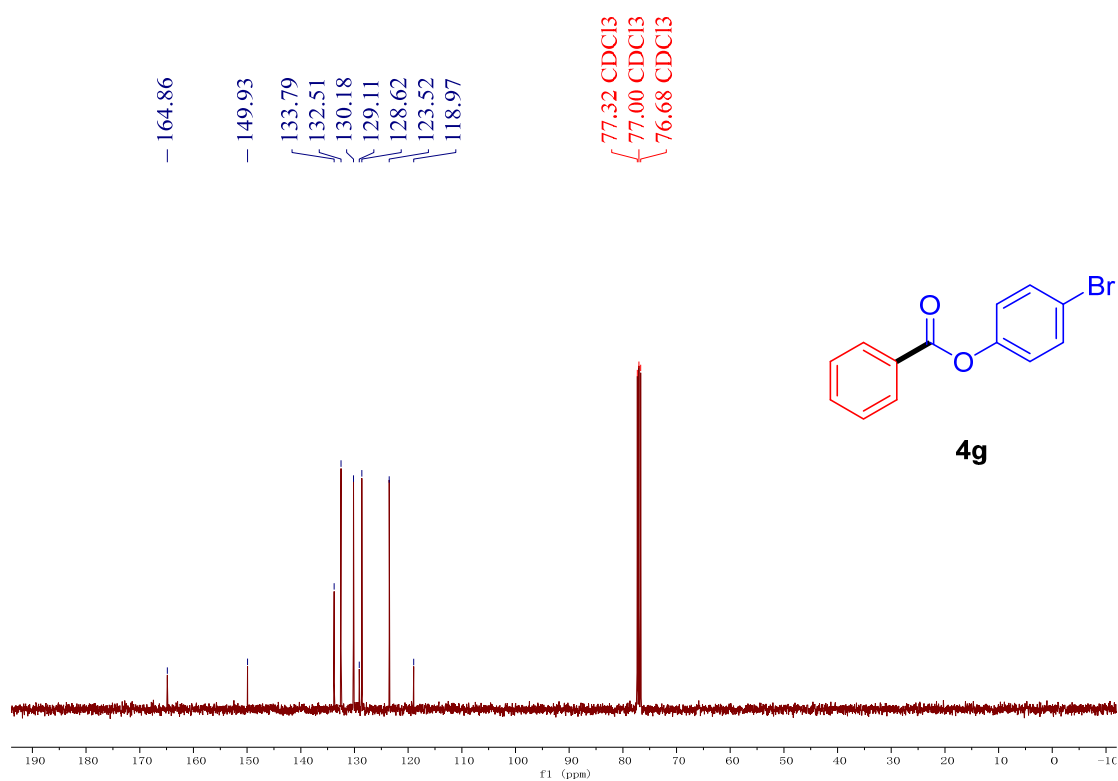

**Figure S56.**  $^1\text{H}$  NMR spectrum of **4h** (400 MHz,  $\text{CDCl}_3$ )

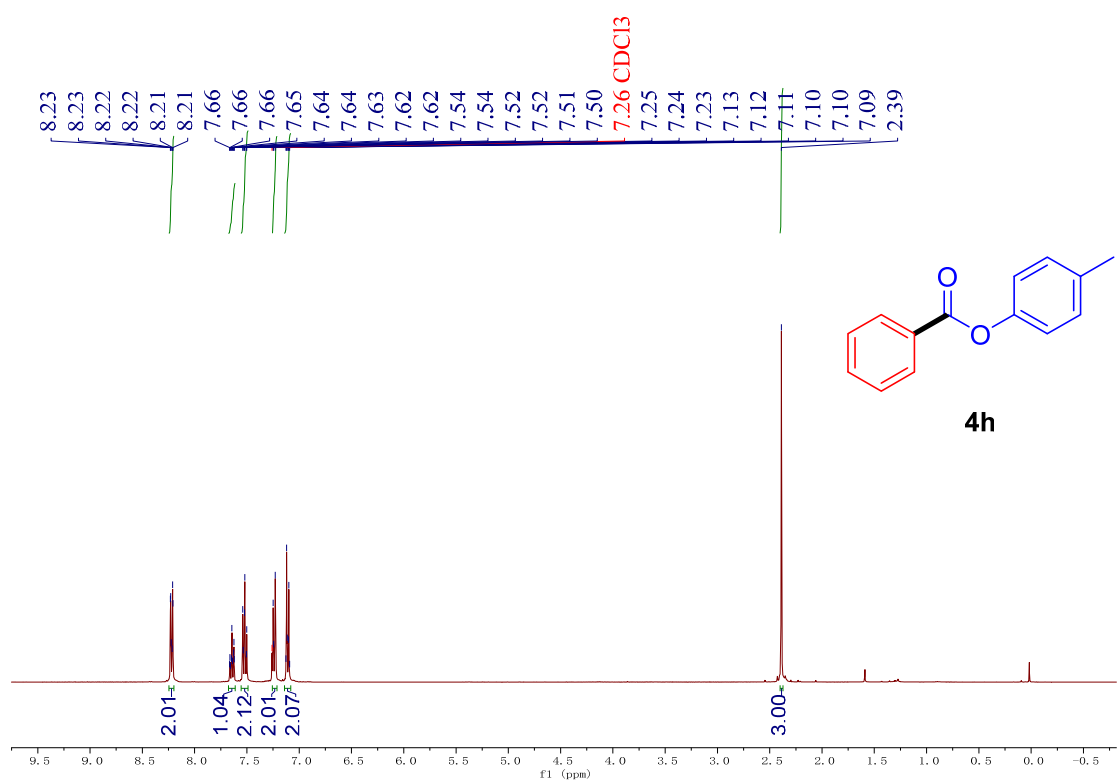

**Figure S57.**  $^{13}\text{C}$  NMR spectrum of **4h** (100 MHz,  $\text{CDCl}_3$ )

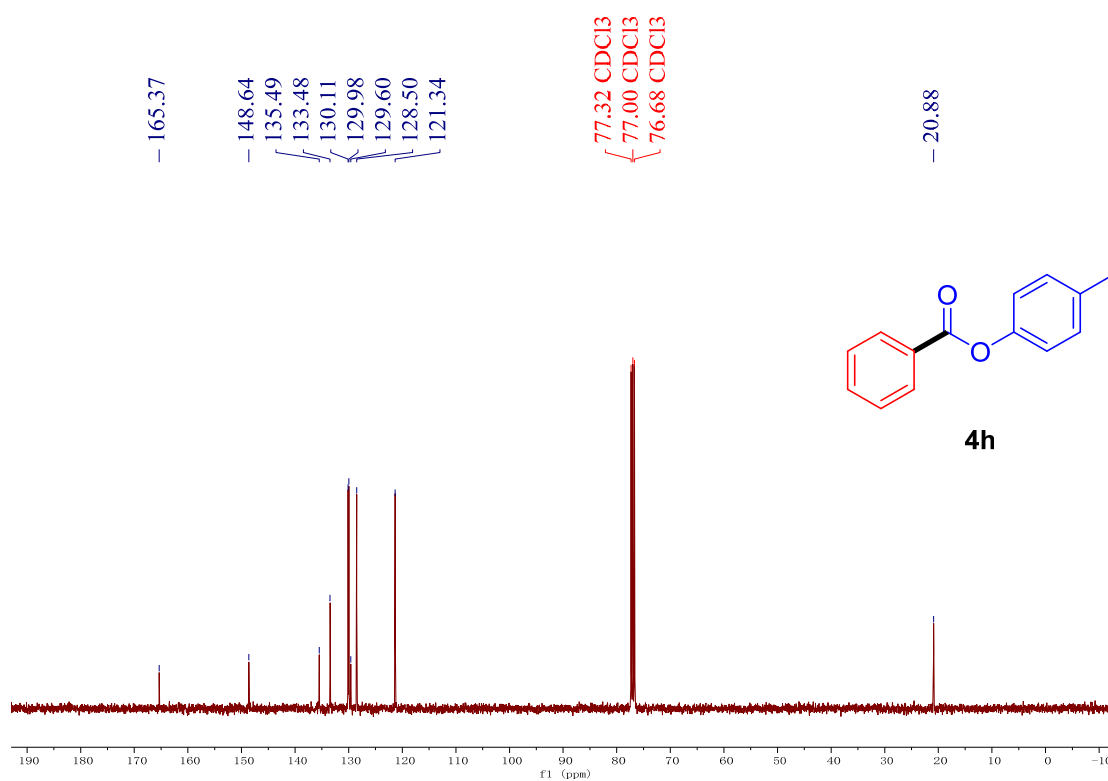

**Figure S58.**  $^1\text{H}$  NMR spectrum of **4i** (400 MHz,  $\text{CDCl}_3$ )

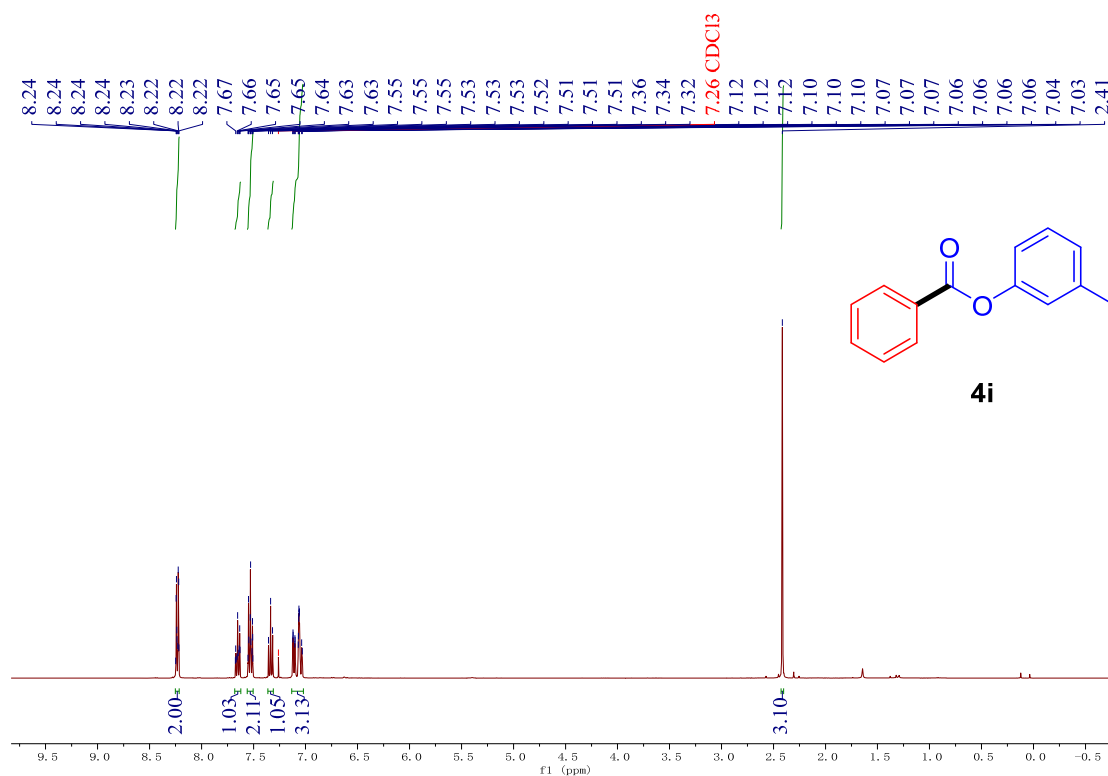

**Figure S59.**  $^{13}\text{C}$  NMR spectrum of **4i** (100 MHz,  $\text{CDCl}_3$ )

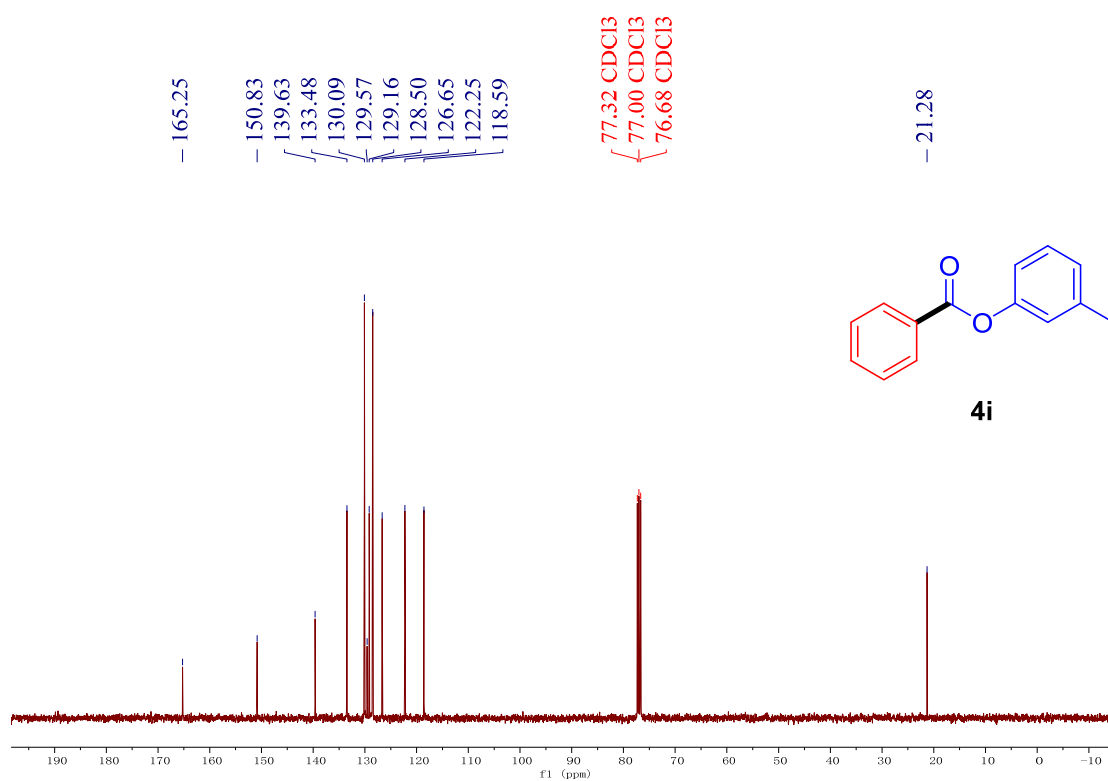

**Figure S60.**  $^1\text{H}$  NMR spectrum of **4j** (400 MHz,  $\text{CDCl}_3$ )

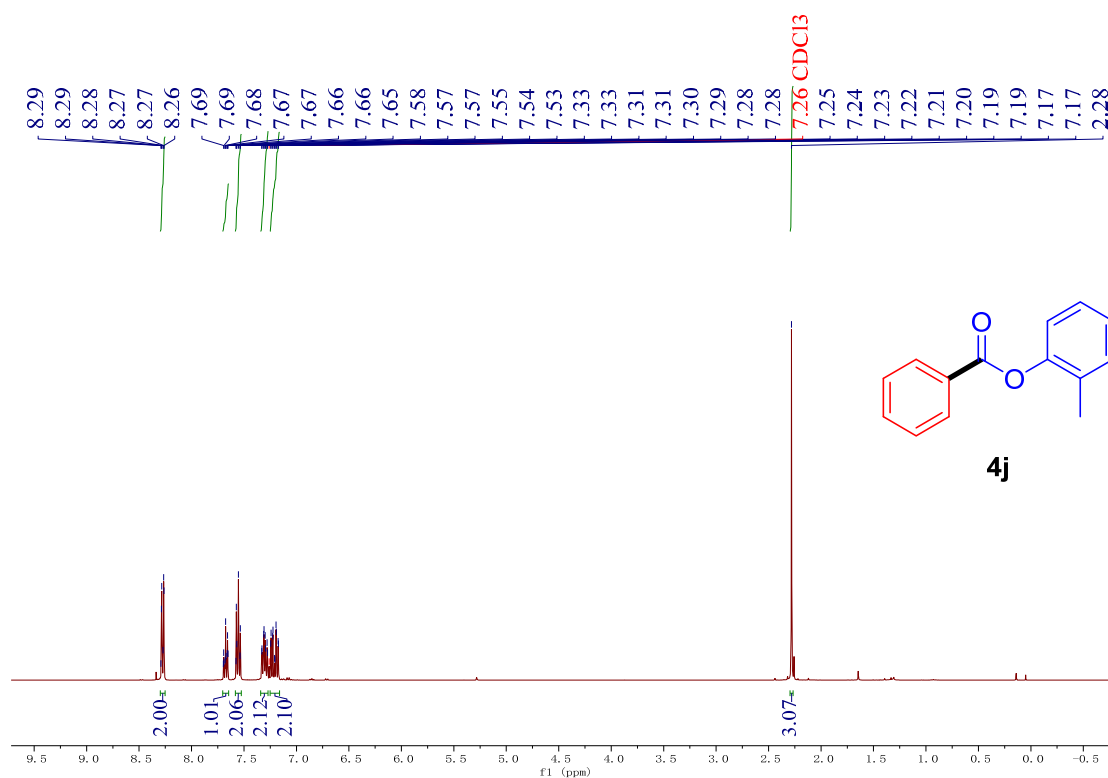

**Figure S61.**  $^{13}\text{C}$  NMR spectrum of **4j** (100 MHz,  $\text{CDCl}_3$ )

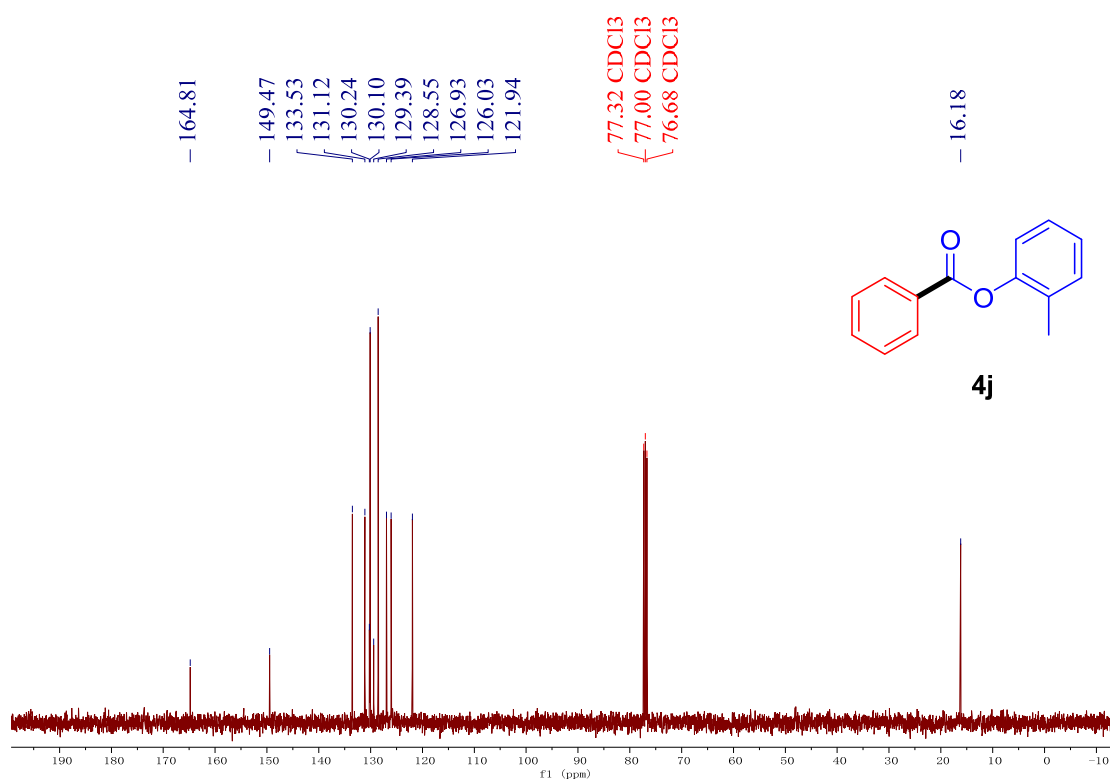

**Figure S62.**  $^1\text{H}$  NMR spectrum of **4k** (400 MHz,  $\text{CDCl}_3$ )

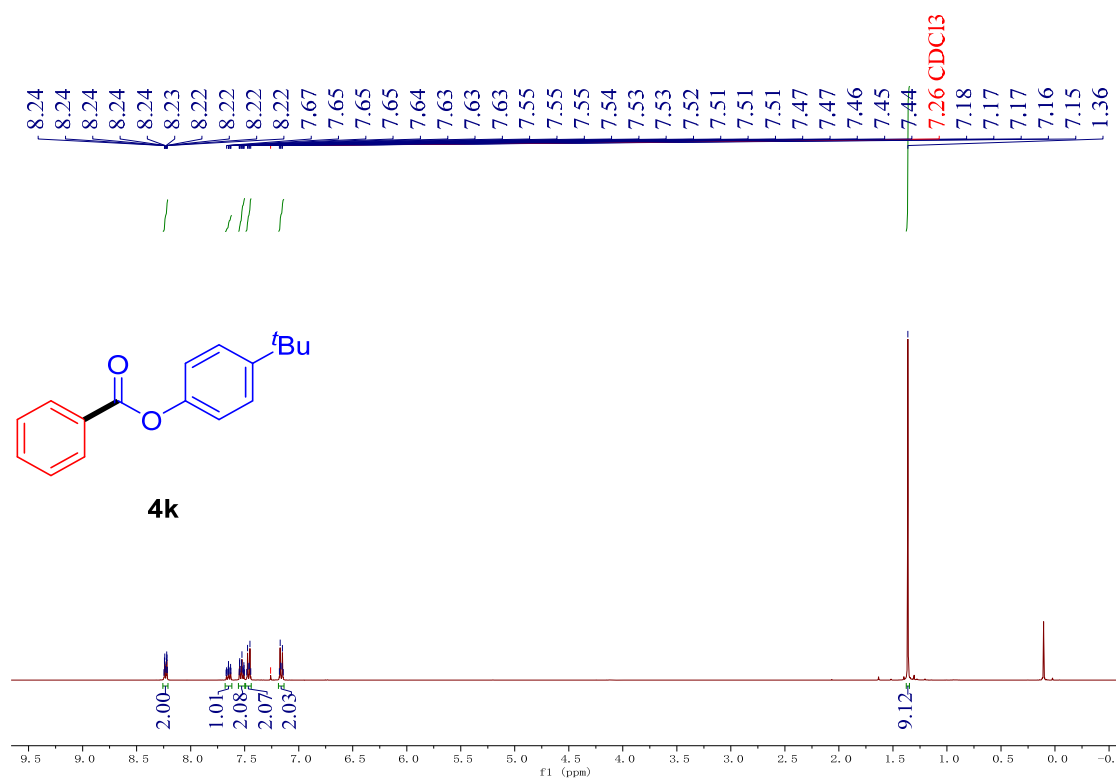

**Figure S63.**  $^{13}\text{C}$  NMR spectrum of **4k** (100 MHz,  $\text{CDCl}_3$ )

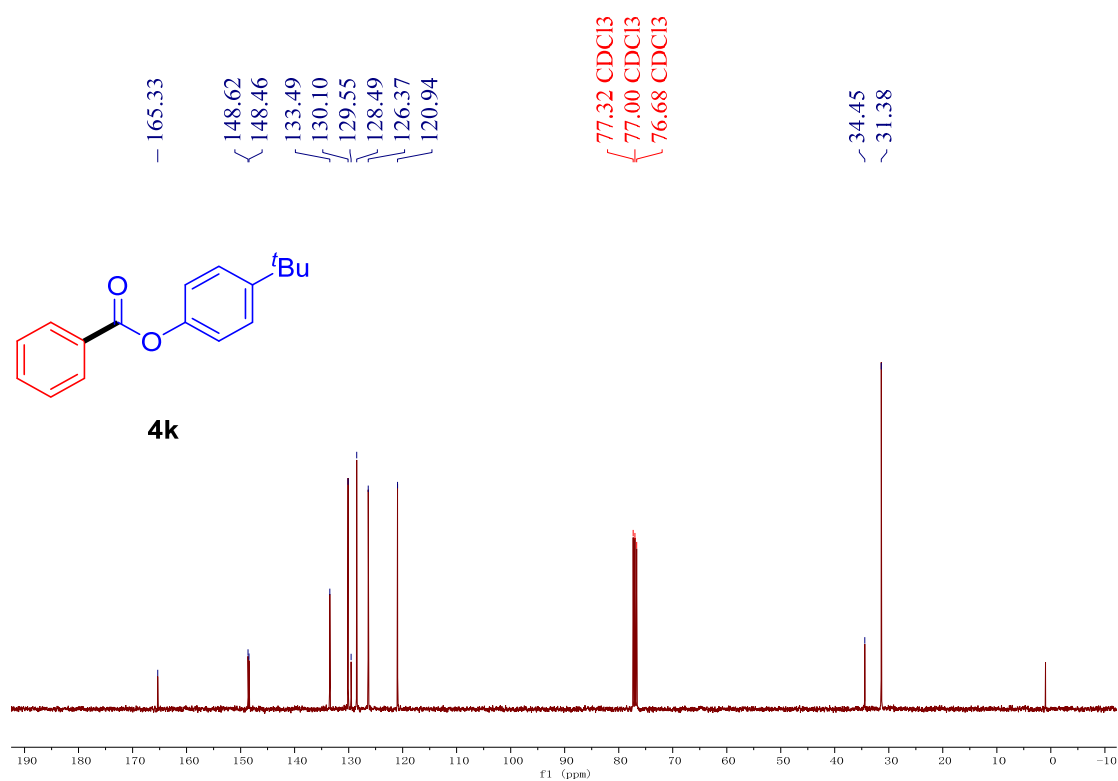

**Figure S64.**  $^1\text{H}$  NMR spectrum of **4l** (400 MHz,  $\text{CDCl}_3$ )

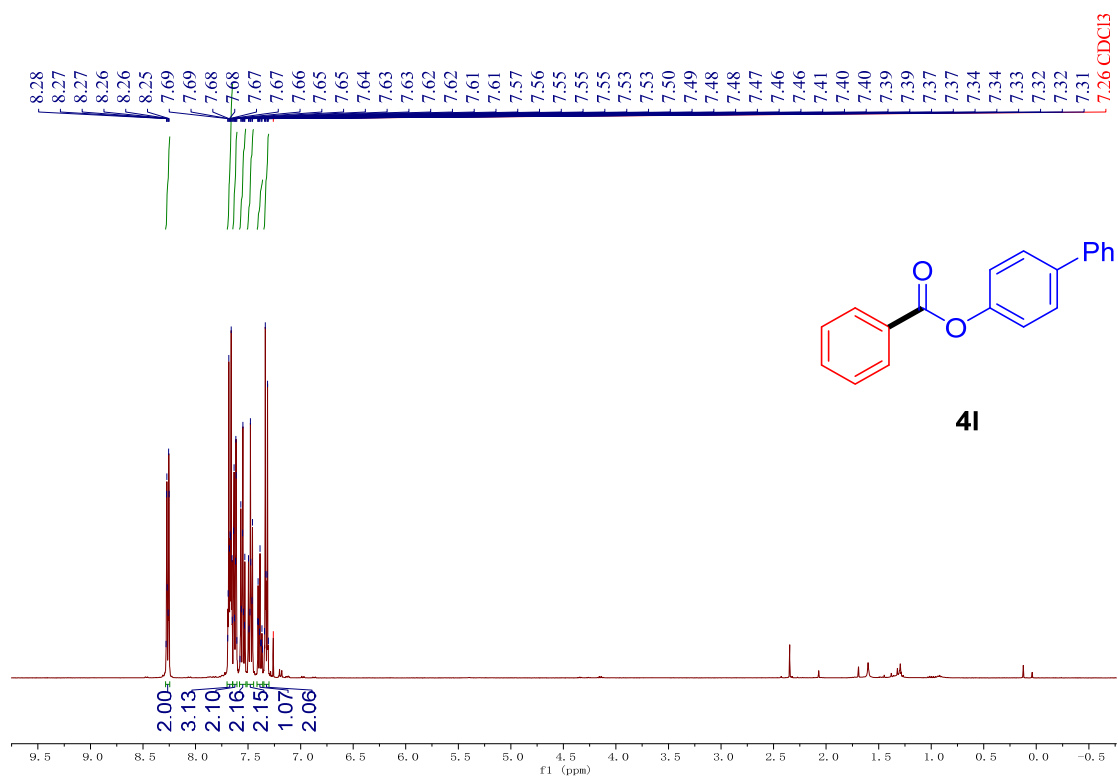

**Figure S65.**  $^{13}\text{C}$  NMR spectrum of **4l** (100 MHz,  $\text{CDCl}_3$ )

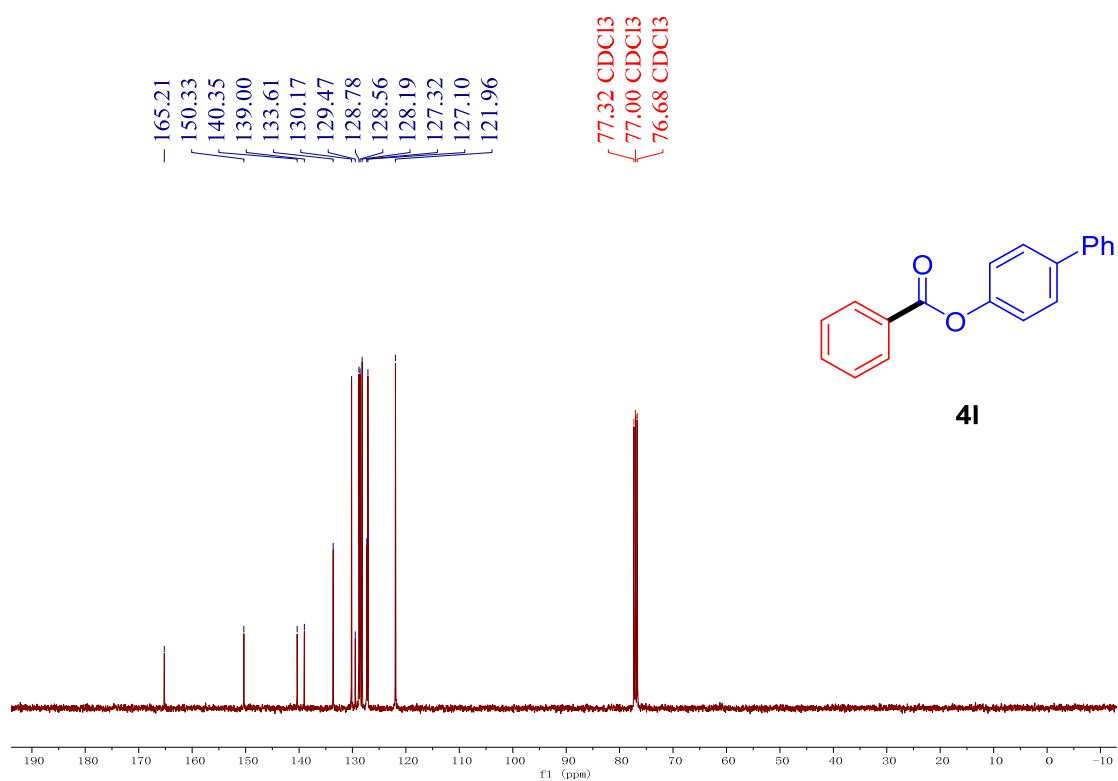

**Figure S66.**  $^1\text{H}$  NMR spectrum of **4m** (400 MHz,  $\text{CDCl}_3$ )

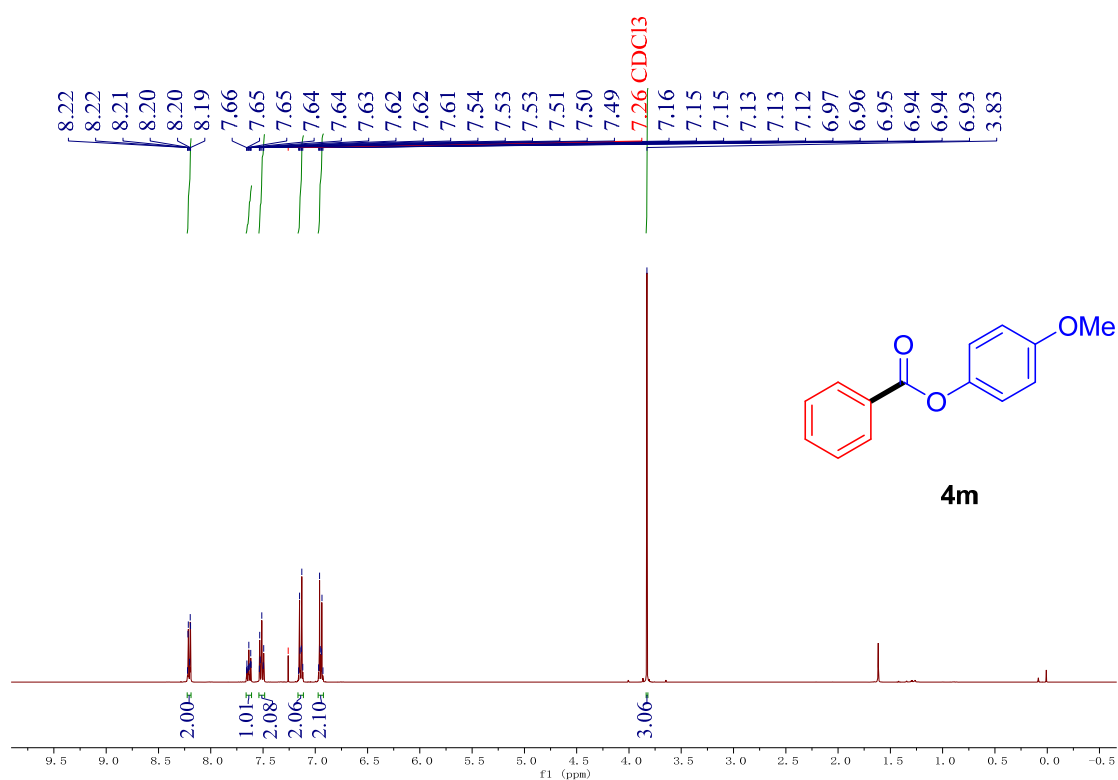



**Figure S67.**  $^{13}\text{C}$  NMR spectrum of **4m** (100 MHz,  $\text{CDCl}_3$ )

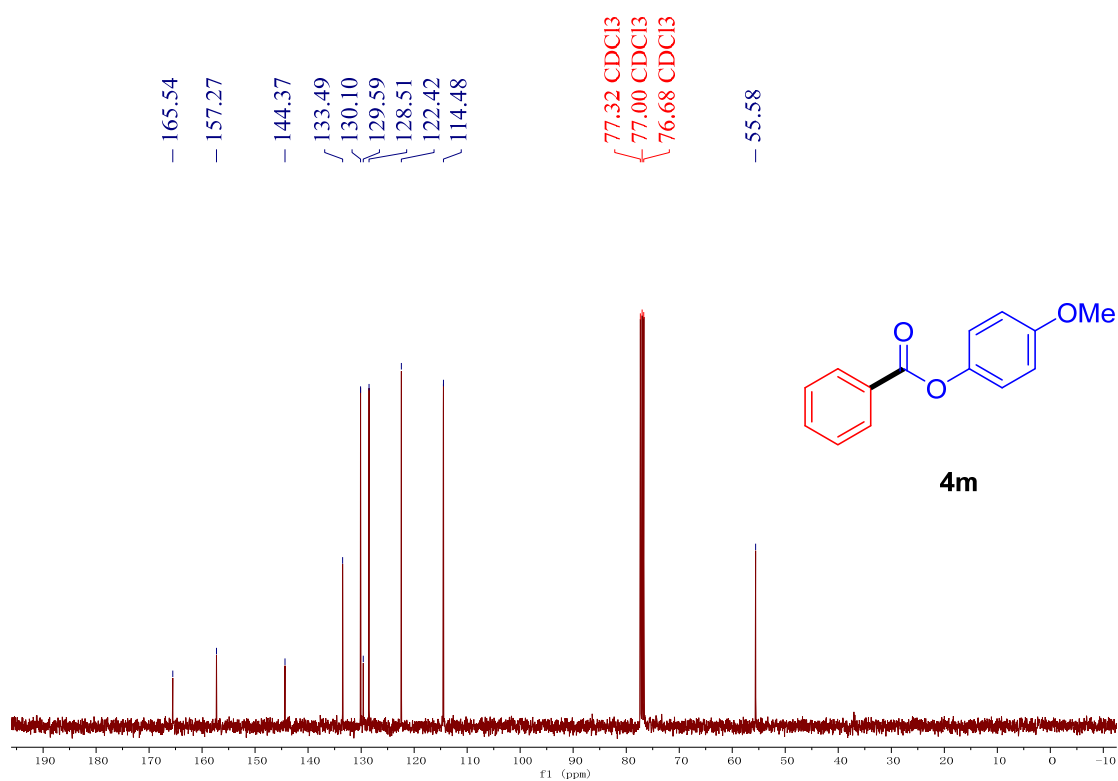

**Figure S68.**  $^1\text{H}$  NMR spectrum of **4n** (400 MHz,  $\text{CDCl}_3$ )

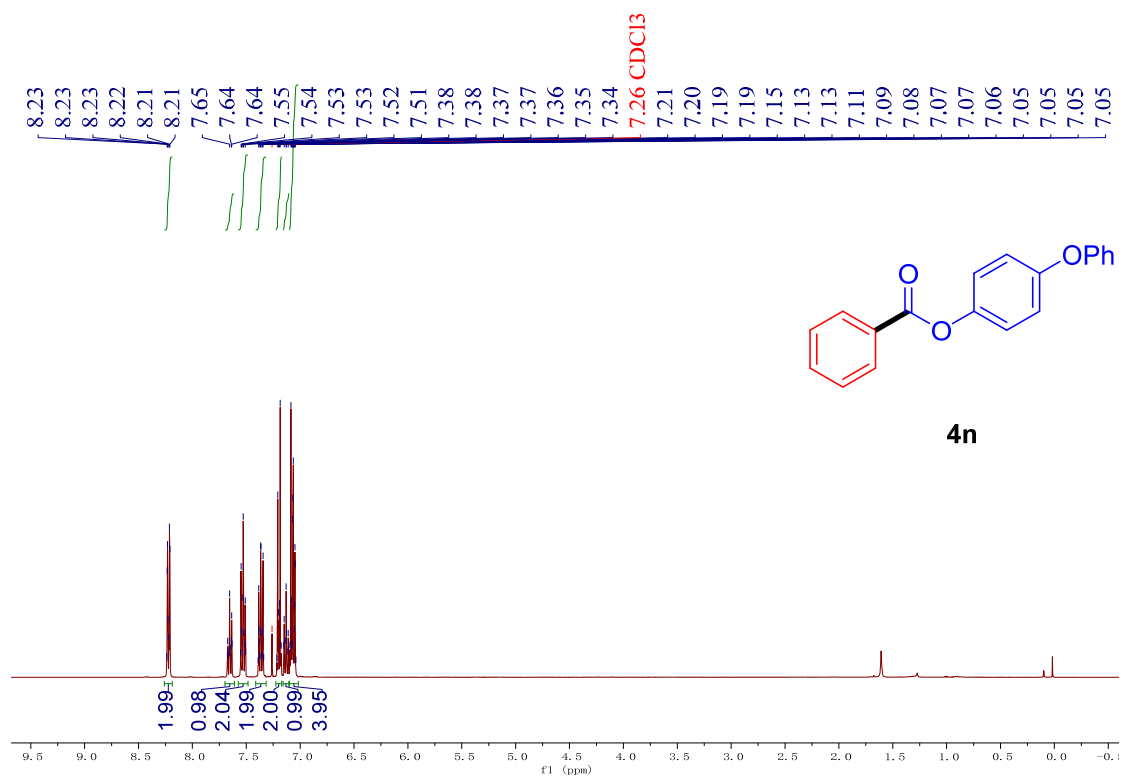

**Figure S69.**  $^{13}\text{C}$  NMR spectrum of **4n** (100 MHz,  $\text{CDCl}_3$ )

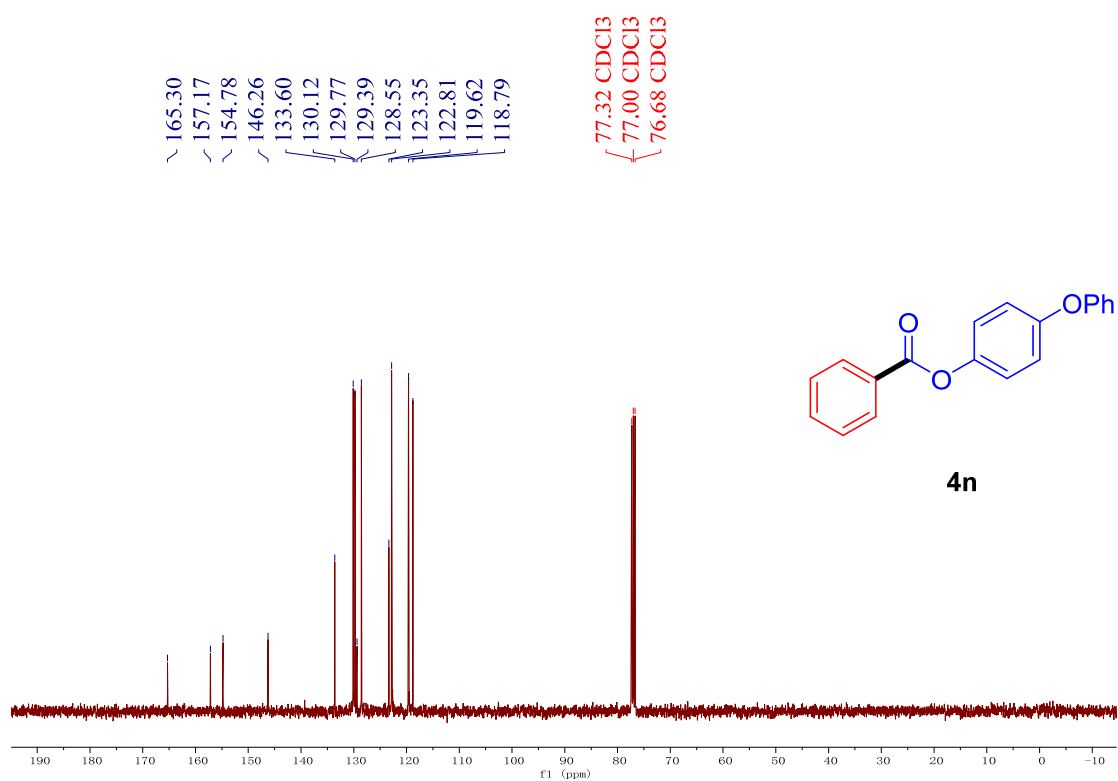

**Figure S70.**  $^1\text{H}$  NMR spectrum of **4o** (400 MHz,  $\text{CDCl}_3$ )

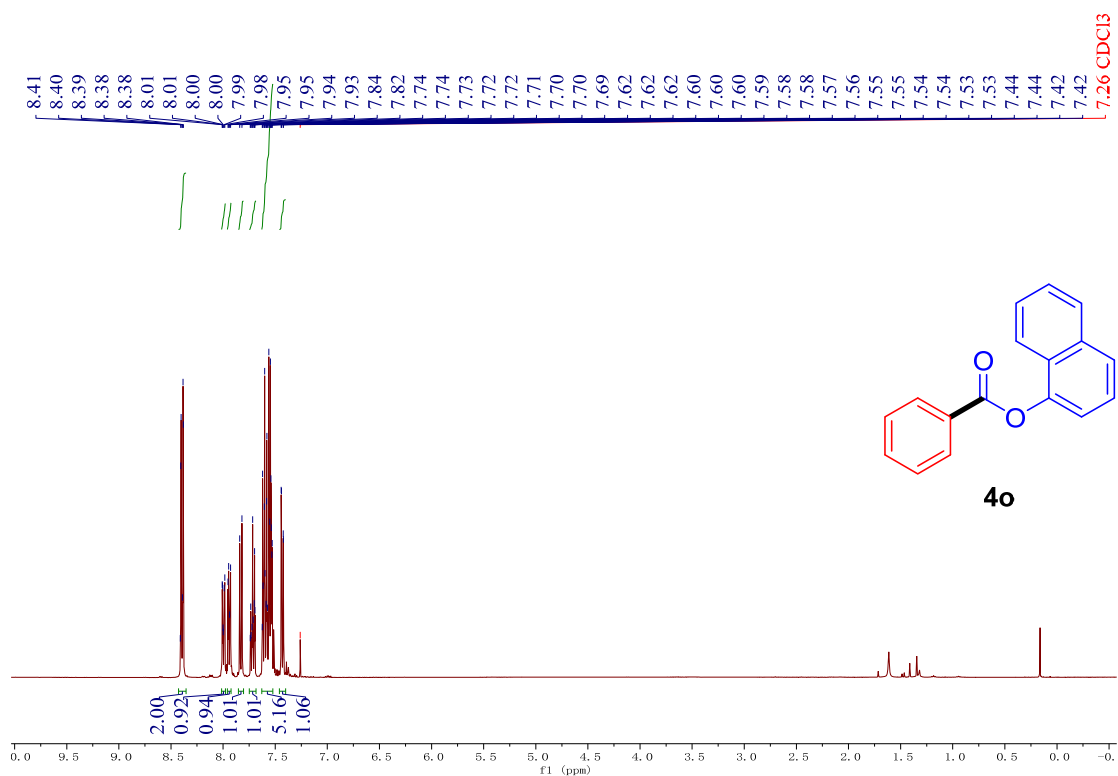

**Figure S71.**  $^{13}\text{C}$  NMR spectrum of **4o** (100 MHz,  $\text{CDCl}_3$ )

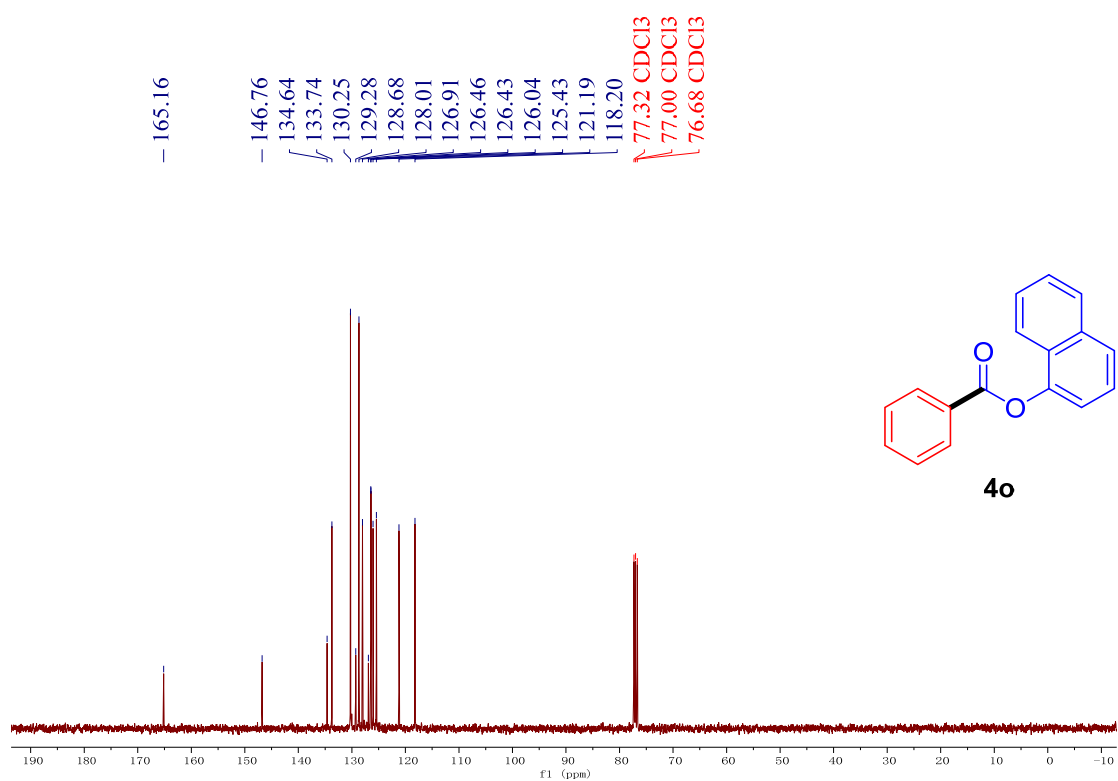

**Figure S72.**  $^1\text{H}$  NMR spectrum of **4p** (400 MHz,  $\text{CDCl}_3$ )

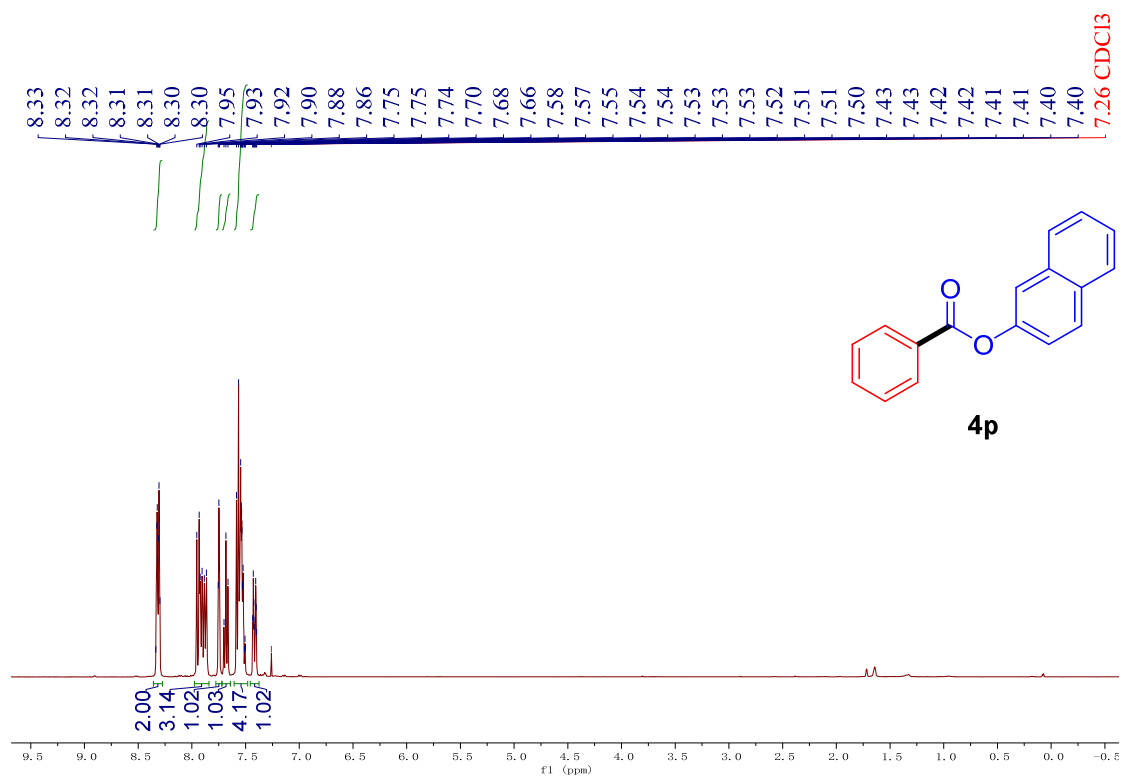

**Figure S73.**  $^{13}\text{C}$  NMR spectrum of **4p** (100 MHz,  $\text{CDCl}_3$ )

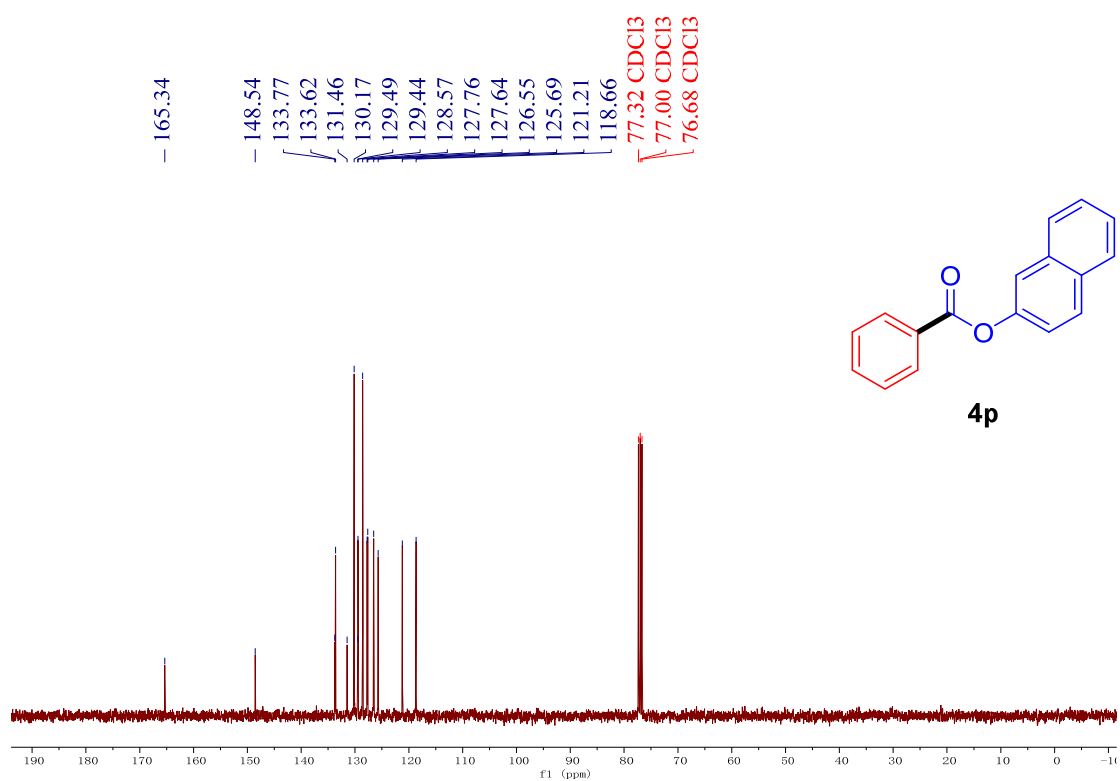

**Figure S74.**  $^1\text{H}$  NMR spectrum of **4q** (400 MHz,  $\text{CDCl}_3$ )

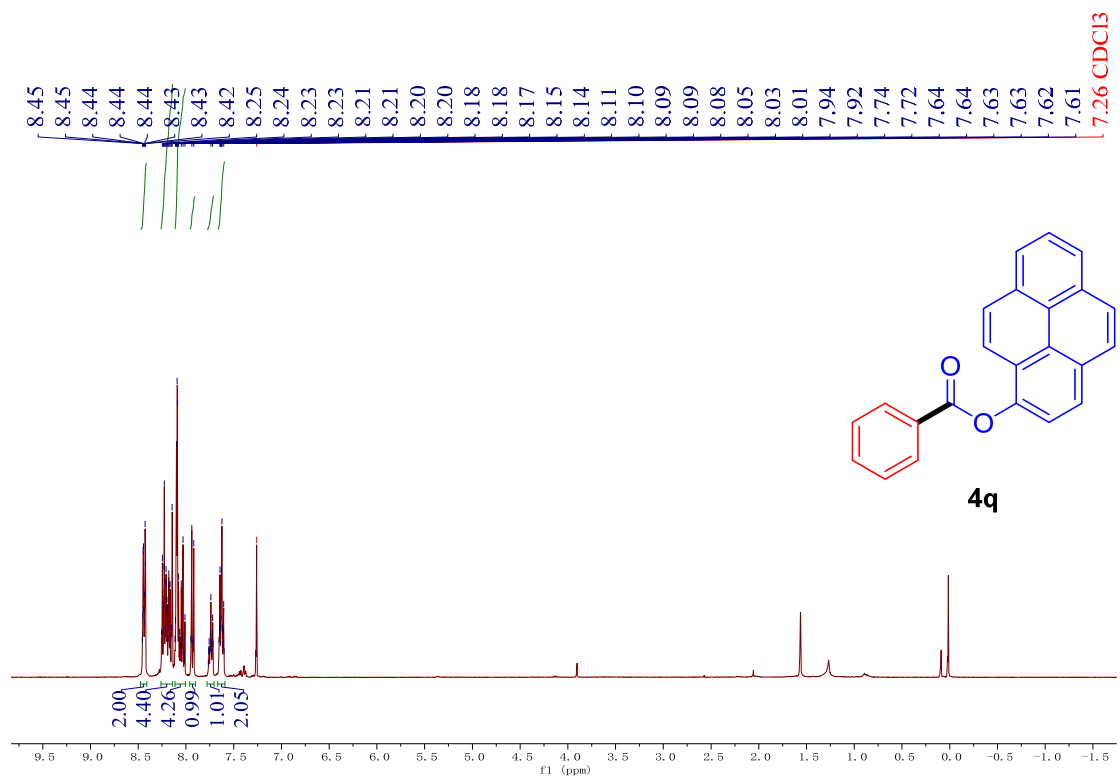

**Figure S75.**  $^{13}\text{C}$  NMR spectrum of **4q** (100 MHz,  $\text{CDCl}_3$ )

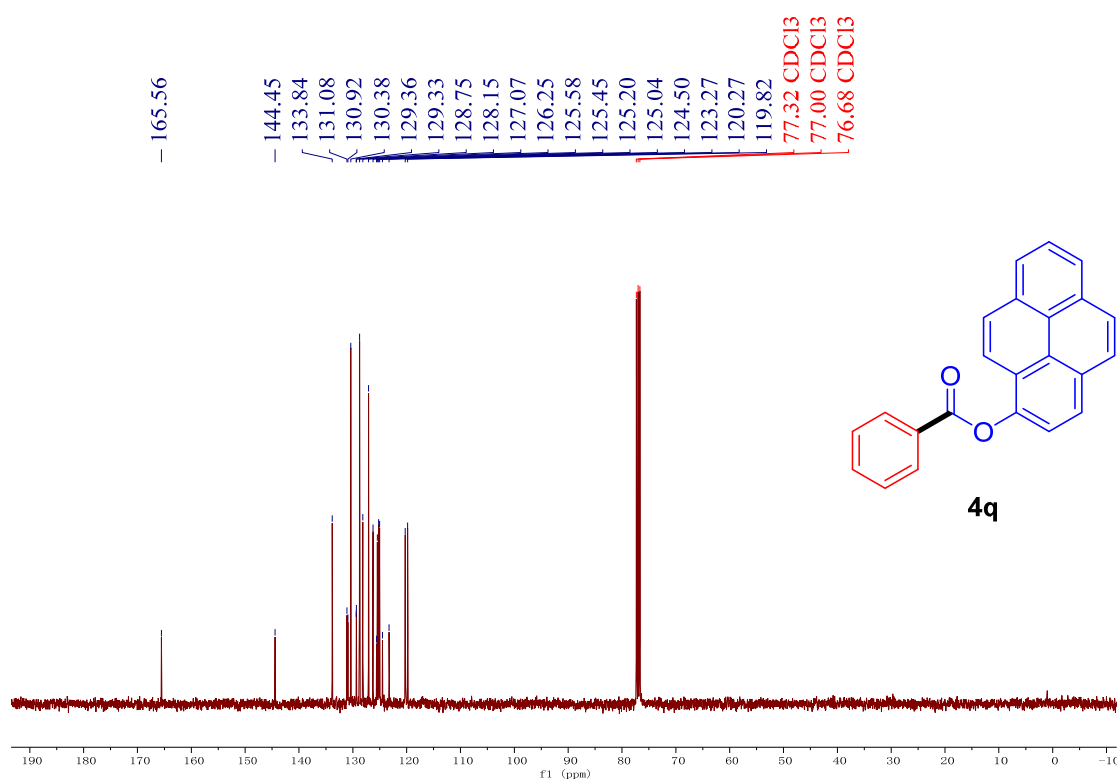

**Figure S76.**  $^1\text{H}$  NMR spectrum of **4s** (400 MHz,  $\text{CDCl}_3$ )

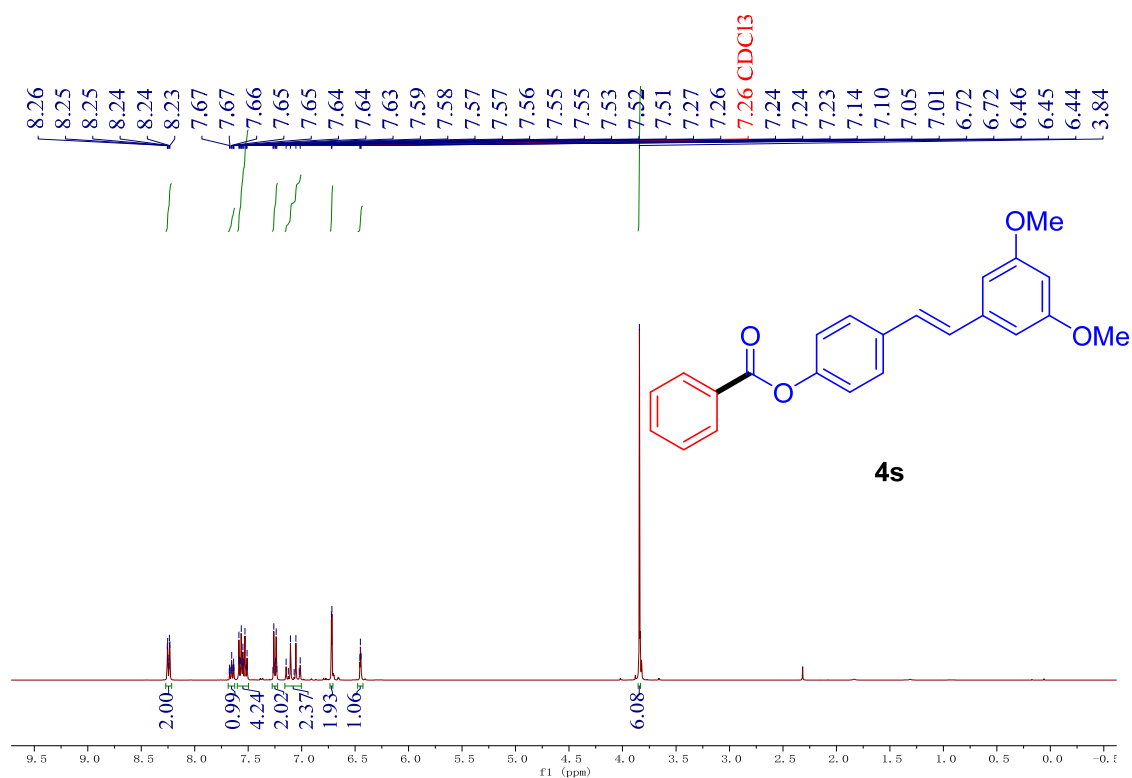

**Figure S77.**  $^{13}\text{C}$  NMR spectrum of **4s** (100 MHz,  $\text{CDCl}_3$ )

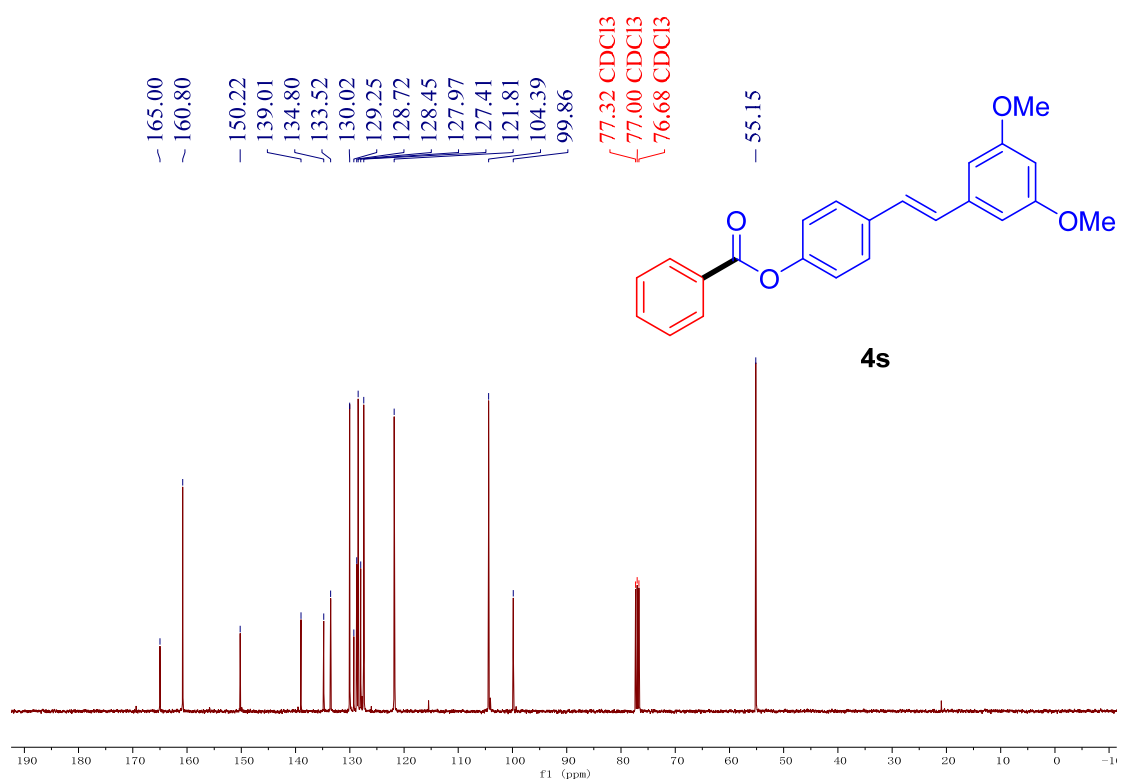

Supplement: s1 [file s1]
